# Supplementary material
Source: publisher figshare collection journal article supplement (https://acs.figshare.com/ndownloader/files/5840040)
Supplement: Supplementary file 1 [file 5840040]

data_alpha-S-1a 
  
_audit_creation_method            SHELXL-97 
_chemical_name_systematic 
; 
(S)-1-(2-methyl-5-pheneyl-3-thienyl)-
2-[2-methyl-5-(4-(3-methyl-1-penten-1-yl)
phenyl)-3-thienyl]perfluorocyclopenentene
; 
_publ_requested_journal
'Organic Letters '
_publ_section_title 
' '
_publ_section_abstract
' '

_publ_contact_author
;Prof. Masahiro. Irie
Department of Chemistry and Biochemistry
Graduate School of Engineering, Kyushu University
Hakozaki 6-10-1, Higashi-ku, Fukuoka, Japan
;
_publ_contact_author_phone            ' 81(92)6423556 '
_publ_contact_author_fax              ' 81(92)6423568 '
_publ_contact_author_email            ' irie@cstf.kyushu-u.ac.jp'

loop_
_publ_author_name
_publ_author_address
'Mr. Satoshi Yamamoto'
;Department of Chemistry and Biochemistry
Graduate School of Engineering, Kyushu University
Hakozaki 6-10-1, Higashi-ku, Fukuoka, Japan
;
'Dr. Kenji Matsuda'
;Department of Chemistry and Biochemistry
Graduate School of Engineering, Kyushu University
Hakozaki 6-10-1, Higashi-ku, Fukuoka, Japan
;
'Prof. Masahiro. Irie'
;Department of Chemistry and Biochemistry
Graduate School of Engineering, Kyushu University
Hakozaki 6-10-1, Higashi-ku, Fukuoka, Japan
;
_chemical_name_common             ? 
_chemical_melting_point           130.5-131.0 
_chemical_formula_moiety          ? 
_chemical_formula_sum 
 'C33 H28 F6 S2' 
_chemical_formula_weight          602.67 
  
loop_ 
 _atom_type_symbol 
 _atom_type_description 
 _atom_type_scat_dispersion_real 
 _atom_type_scat_dispersion_imag 
 _atom_type_scat_source 
 'C'  'C'   0.0033   0.0016 
 'International Tables Vol C Tables 4.2.6.8 and 6.1.1.4' 
 'H'  'H'   0.0000   0.0000 
 'International Tables Vol C Tables 4.2.6.8 and 6.1.1.4' 
 'F'  'F'   0.0171   0.0103 
 'International Tables Vol C Tables 4.2.6.8 and 6.1.1.4' 
 'S'  'S'   0.1246   0.1234 
 'International Tables Vol C Tables 4.2.6.8 and 6.1.1.4' 
  
_symmetry_cell_setting            Monoclinic 
_symmetry_space_group_name_H-M    P2(1) 
  
loop_ 
 _symmetry_equiv_pos_as_xyz 
 'x, y, z' 
 '-x, y+1/2, -z' 
  
_cell_length_a                    15.7480(15) 
_cell_length_b                    8.6888(8) 
_cell_length_c                    21.240(2) 
_cell_angle_alpha                 90.00 
_cell_angle_beta                  102.789(2) 
_cell_angle_gamma                 90.00 
_cell_volume                      2834.2(5) 
_cell_formula_units_Z             4 
_cell_measurement_temperature     86(2) 
_cell_measurement_reflns_used     ? 
_cell_measurement_theta_min       0.98 
_cell_measurement_theta_max       27.52 
  
_exptl_crystal_description        block 
_exptl_crystal_colour             colorless 
_exptl_crystal_size_max           0.5 
_exptl_crystal_size_mid           0.4 
_exptl_crystal_size_min           0.3 
_exptl_crystal_density_meas       ? 
_exptl_crystal_density_diffrn     1.412 
_exptl_crystal_density_method     'not measured' 
_exptl_crystal_F_000              1248 
_exptl_absorpt_coefficient_mu     0.250 
_exptl_absorpt_correction_type    'multi-scan'
_exptl_absorpt_correction_T_min   0.788306 
_exptl_absorpt_correction_T_max   1.000000  
_exptl_absorpt_process_details    'Bruker SADABS' 
  
_exptl_special_details 
; 
 ? 
; 
  
_diffrn_ambient_temperature       86(2) 
_diffrn_radiation_wavelength      0.71073 
_diffrn_radiation_type            MoK\a 
_diffrn_radiation_source          'sealed tube'  
_diffrn_radiation_monochromator   graphite 
_diffrn_measurement_device_type   'CCD area detector' 
_diffrn_measurement_method        'omega scans' 
_diffrn_detector_area_resol_mean  ? 
_diffrn_standards_number          ? 
_diffrn_standards_interval_count  ? 
_diffrn_standards_interval_time   ? 
_diffrn_standards_decay_%         -0.24
_diffrn_reflns_number             11279 
_diffrn_reflns_av_R_equivalents   0.0252 
_diffrn_reflns_av_sigmaI/netI     0.0805 
_diffrn_reflns_limit_h_min        -11 
_diffrn_reflns_limit_h_max        20 
_diffrn_reflns_limit_k_min        -11 
_diffrn_reflns_limit_k_max        11 
_diffrn_reflns_limit_l_min        -26 
_diffrn_reflns_limit_l_max        11 
_diffrn_reflns_theta_min          0.98 
_diffrn_reflns_theta_max          27.52 
_reflns_number_total              9436 
_reflns_number_gt                 5858 
_reflns_threshold_expression      >2sigma(I) 
  
_computing_data_collection        'Bruker SMART' 
_computing_cell_refinement        'Bruker SMART' 
_computing_data_reduction         'Bruker SHELXTL' 
_computing_structure_solution     'SHELXS-97 (Sheldrick, 1990)' 
_computing_structure_refinement   'SHELXL-97 (Sheldrick, 1997)' 
_computing_molecular_graphics     'Bruker SHELXTL' 
_computing_publication_material   'Bruker SHELXTL' 
  
_refine_special_details 
; 
 Refinement of F^2^ against ALL reflections.  The weighted R-factor wR and 
 goodness of fit S are based on F^2^, conventional R-factors R are based 
 on F, with F set to zero for negative F^2^. The threshold expression of 
 F^2^ > 2sigma(F^2^) is used only for calculating R-factors(gt) etc. and is 
 not relevant to the choice of reflections for refinement.  R-factors based 
 on F^2^ are statistically about twice as large as those based on F, and R- 
 factors based on ALL data will be even larger. 
; 
  
_refine_ls_structure_factor_coef  Fsqd 
_refine_ls_matrix_type            full 
_refine_ls_weighting_scheme       calc 
_refine_ls_weighting_details 
 'calc w=1/[\s^2^(Fo^2^)+(0.0542P)^2^+0.0000P] where P=(Fo^2^+2Fc^2^)/3' 
_atom_sites_solution_primary      direct 
_atom_sites_solution_secondary    difmap 
_atom_sites_solution_hydrogens    geom 
_refine_ls_hydrogen_treatment     mixed 
_refine_ls_extinction_method      none 
_refine_ls_extinction_coef        ? 
_refine_ls_abs_structure_details 
 'Flack H D (1983), Acta Cryst. A39, 876-881' 
_refine_ls_abs_structure_Flack    0.06(13) 
_refine_ls_number_reflns          9436 
_refine_ls_number_parameters      747 
_refine_ls_number_restraints      1 
_refine_ls_R_factor_all           0.0946 
_refine_ls_R_factor_gt            0.0479 
_refine_ls_wR_factor_ref          0.1125 
_refine_ls_wR_factor_gt           0.0970 
_refine_ls_goodness_of_fit_ref    0.927 
_refine_ls_restrained_S_all       0.927 
_refine_ls_shift/su_max           0.001 
_refine_ls_shift/su_mean          0.000 
  
loop_ 
 _atom_site_label 
 _atom_site_type_symbol 
 _atom_site_fract_x 
 _atom_site_fract_y 
 _atom_site_fract_z 
 _atom_site_U_iso_or_equiv 
 _atom_site_adp_type 
 _atom_site_occupancy 
 _atom_site_symmetry_multiplicity 
 _atom_site_calc_flag 
 _atom_site_refinement_flags 
 _atom_site_disorder_assembly 
 _atom_site_disorder_group 
F1 F -0.2641(3) -0.1602(6) -0.1844(2) 0.0311(12) Uani 1 1 d . . . 
F2 F -0.2799(3) 0.0094(5) -0.1134(2) 0.0320(12) Uani 1 1 d . . . 
F3 F -0.4086(3) -0.0978(6) -0.25983(19) 0.0344(12) Uani 1 1 d . . . 
F4 F -0.3876(3) 0.1240(5) -0.2124(2) 0.0370(13) Uani 1 1 d . . . 
F5 F -0.5490(3) -0.0948(6) -0.2207(2) 0.0354(13) Uani 1 1 d . . . 
F6 F -0.5010(3) 0.0694(5) -0.1443(2) 0.0339(13) Uani 1 1 d . . . 
S1 S -0.25837(13) -0.6043(2) -0.03583(10) 0.0277(5) Uani 1 1 d . . . 
S2 S -0.58927(13) -0.3716(2) -0.00855(9) 0.0226(5) Uani 1 1 d . . . 
C1 C -0.3381(5) -0.4916(9) -0.0837(4) 0.0227(19) Uani 1 1 d . . . 
C2 C -0.3118(5) -0.3401(9) -0.0852(3) 0.0208(18) Uani 1 1 d . . . 
C3 C -0.2235(5) -0.3197(10) -0.0470(4) 0.024(2) Uani 1 1 d . . . 
H3 H -0.1938 -0.2238 -0.0429 0.028 Uiso 1 1 calc R . . 
C4 C -0.1871(5) -0.4533(10) -0.0175(4) 0.026(2) Uani 1 1 d . . . 
C5 C -0.4964(5) -0.2966(8) -0.0269(3) 0.0164(18) Uani 1 1 d . . . 
C6 C -0.5142(5) -0.2563(9) -0.0919(4) 0.0187(18) Uani 1 1 d . . . 
C7 C -0.6021(5) -0.2860(8) -0.1251(4) 0.0201(18) Uani 1 1 d . . . 
H7 H -0.6242 -0.2625 -0.1694 0.024 Uiso 1 1 calc R . . 
C8 C -0.6513(5) -0.3518(9) -0.0865(3) 0.0210(19) Uani 1 1 d . . . 
C9 C -0.4219(5) -0.5652(8) -0.1172(4) 0.0260(19) Uani 1 1 d . . . 
H9A H -0.4519 -0.4982 -0.1522 0.039 Uiso 1 1 calc R . . 
H9B H -0.4589 -0.5809 -0.0862 0.039 Uiso 1 1 calc R . . 
H9C H -0.4097 -0.6647 -0.1350 0.039 Uiso 1 1 calc R . . 
C10 C -0.4156(5) -0.2844(9) 0.0240(3) 0.0217(19) Uani 1 1 d . . . 
H10A H -0.3741 -0.2170 0.0091 0.033 Uiso 1 1 calc R . . 
H10B H -0.3899 -0.3868 0.0334 0.033 Uiso 1 1 calc R . . 
H10C H -0.4293 -0.2412 0.0632 0.033 Uiso 1 1 calc R . . 
C11 C -0.3657(5) -0.2180(9) -0.1195(4) 0.0224(19) Uani 1 1 d . . . 
C12 C -0.3226(5) -0.0994(8) -0.1539(4) 0.0210(18) Uani 1 1 d . . . 
C13 C -0.3974(5) -0.0264(10) -0.2022(4) 0.026(2) Uani 1 1 d . . . 
C14 C -0.4769(5) -0.0575(9) -0.1728(4) 0.0211(19) Uani 1 1 d . . . 
C15 C -0.4496(5) -0.1870(9) -0.1259(4) 0.0217(19) Uani 1 1 d . . . 
C16 C -0.1001(5) -0.4711(10) 0.0256(4) 0.025(2) Uani 1 1 d . . . 
C17 C -0.0329(5) -0.3769(10) 0.0222(4) 0.035(2) Uani 1 1 d . . . 
H17 H -0.0419 -0.2970 -0.0091 0.042 Uiso 1 1 calc R . . 
C18 C 0.0496(6) -0.3929(13) 0.0631(4) 0.041(2) Uani 1 1 d . . . 
H18 H 0.0953 -0.3232 0.0609 0.049 Uiso 1 1 calc R . . 
C19 C 0.0626(5) -0.5123(12) 0.1067(4) 0.038(2) Uani 1 1 d . . . 
H19 H 0.1183 -0.5271 0.1343 0.045 Uiso 1 1 calc R . . 
C20 C -0.0047(6) -0.6108(10) 0.1106(4) 0.035(2) Uani 1 1 d . . . 
H20 H 0.0049 -0.6919 0.1414 0.042 Uiso 1 1 calc R . . 
C21 C -0.0855(5) -0.5927(10) 0.0704(4) 0.031(2) Uani 1 1 d . . . 
H21 H -0.1312 -0.6620 0.0730 0.038 Uiso 1 1 calc R . . 
C22 C -0.7406(5) -0.4069(9) -0.1046(4) 0.0207(19) Uani 1 1 d . . . 
C23 C -0.7866(5) -0.4053(10) -0.1703(4) 0.030(2) Uani 1 1 d . . . 
H23 H -0.7588 -0.3702 -0.2030 0.036 Uiso 1 1 calc R . . 
C24 C -0.8718(5) -0.4548(9) -0.1862(4) 0.0314(18) Uani 1 1 d . . . 
H24 H -0.9018 -0.4516 -0.2302 0.038 Uiso 1 1 calc R . . 
C25 C -0.9151(5) -0.5085(11) -0.1414(4) 0.033(2) Uani 1 1 d . . . 
C26 C -0.8691(5) -0.5106(11) -0.0767(4) 0.034(2) Uani 1 1 d . . . 
H26 H -0.8972 -0.5474 -0.0444 0.041 Uiso 1 1 calc R . . 
C27 C -0.7853(5) -0.4612(10) -0.0592(4) 0.030(2) Uani 1 1 d . . . 
H27 H -0.7564 -0.4636 -0.0149 0.036 Uiso 1 1 calc R . . 
C28 C -1.0059(5) -0.5668(10) -0.1585(4) 0.042(2) Uani 1 1 d . . . 
H28 H -1.0356 -0.5713 -0.1242 0.051 Uiso 1 1 calc R . . 
C29 C -1.0484(5) -0.6111(11) -0.2130(4) 0.070(3) Uani 1 1 d . . . 
H29 H -1.0188 -0.6031 -0.2473 0.084 Uiso 1 1 calc R . . 
C30 C -1.1401(4) -0.6755(9) -0.2316(3) 0.0591(19) Uani 1 1 d . . . 
H30 H -1.1385 -0.7806 -0.2122 0.071 Uiso 1 1 calc R . . 
C31 C -1.1667(6) -0.6948(12) -0.3039(4) 0.064(3) Uani 1 1 d . . . 
H31A H -1.1714 -0.5916 -0.3241 0.077 Uiso 1 1 calc R . . 
H31B H -1.1200 -0.7512 -0.3186 0.077 Uiso 1 1 calc R . . 
C32 C -1.2496(8) -0.7771(16) -0.3274(6) 0.126(6) Uani 1 1 d . . . 
H32A H -1.2980 -0.7131 -0.3205 0.189 Uiso 1 1 calc R . . 
H32B H -1.2488 -0.8741 -0.3037 0.189 Uiso 1 1 calc R . . 
H32C H -1.2571 -0.7988 -0.3736 0.189 Uiso 1 1 calc R . . 
C33 C -1.2053(6) -0.5828(16) -0.2057(5) 0.106(5) Uani 1 1 d . . . 
H33A H -1.2040 -0.4757 -0.2199 0.159 Uiso 1 1 calc R . . 
H33B H -1.1908 -0.5868 -0.1584 0.159 Uiso 1 1 calc R . . 
H33C H -1.2637 -0.6255 -0.2218 0.159 Uiso 1 1 calc R . . 
F7 F -0.7179(3) -0.6157(5) -0.3893(2) 0.0307(12) Uani 1 1 d . . . 
F8 F -0.7393(3) -0.4460(6) -0.3184(2) 0.0313(12) Uani 1 1 d . . . 
F9 F -0.6129(3) -0.7250(5) -0.2888(2) 0.0361(13) Uani 1 1 d . . . 
F10 F -0.5928(3) -0.5024(6) -0.24192(19) 0.0362(12) Uani 1 1 d . . . 
F11 F -0.4994(3) -0.6712(5) -0.3555(2) 0.0319(12) Uani 1 1 d . . . 
F12 F -0.4528(3) -0.5079(6) -0.2798(2) 0.0335(12) Uani 1 1 d . . . 
S3 S -0.74621(13) -0.0021(2) -0.46607(10) 0.0266(5) Uani 1 1 d . . . 
S4 S -0.40861(14) -0.2325(2) -0.49111(10) 0.0266(5) Uani 1 1 d . . . 
C34 C -0.6653(5) -0.1093(9) -0.4201(4) 0.0243(19) Uani 1 1 d . . . 
C35 C -0.6906(5) -0.2595(9) -0.4193(4) 0.0211(18) Uani 1 1 d . . . 
C36 C -0.7779(5) -0.2854(10) -0.4546(4) 0.023(2) Uani 1 1 d . . . 
H36 H -0.8060 -0.3826 -0.4567 0.028 Uiso 1 1 calc R . . 
C37 C -0.8156(5) -0.1614(10) -0.4839(3) 0.024(2) Uani 1 1 d . . . 
C38 C -0.5004(5) -0.3064(9) -0.4713(4) 0.029(2) Uani 1 1 d . . . 
C39 C -0.4861(5) -0.3465(9) -0.4077(4) 0.023(2) Uani 1 1 d . . . 
C40 C -0.3984(5) -0.3147(9) -0.3754(4) 0.025(2) Uani 1 1 d . . . 
H40 H -0.3767 -0.3365 -0.3310 0.030 Uiso 1 1 calc R . . 
C41 C -0.3485(5) -0.2512(10) -0.4129(4) 0.0221(19) Uani 1 1 d . . . 
C42 C -0.5825(5) -0.0351(10) -0.3851(3) 0.026(2) Uani 1 1 d . . . 
H42A H -0.5368 -0.0534 -0.4088 0.039 Uiso 1 1 calc R . . 
H42B H -0.5649 -0.0793 -0.3417 0.039 Uiso 1 1 calc R . . 
H42C H -0.5917 0.0759 -0.3817 0.039 Uiso 1 1 calc R . . 
C43 C -0.5828(5) -0.3151(10) -0.5247(4) 0.031(2) Uani 1 1 d . . . 
H43A H -0.6166 -0.2203 -0.5249 0.046 Uiso 1 1 calc R . . 
H43B H -0.6179 -0.4034 -0.5170 0.046 Uiso 1 1 calc R . . 
H43C H -0.5669 -0.3272 -0.5665 0.046 Uiso 1 1 calc R . . 
C44 C -0.6375(5) -0.3841(9) -0.3832(3) 0.0171(18) Uani 1 1 d . . . 
C45 C -0.6761(5) -0.5024(10) -0.3474(3) 0.026(2) Uani 1 1 d . . . 
C46 C -0.6009(5) -0.5753(9) -0.2994(4) 0.0239(19) Uani 1 1 d . . . 
C47 C -0.5206(5) -0.5399(9) -0.3272(4) 0.023(2) Uani 1 1 d . . . 
C48 C -0.5492(5) -0.4137(9) -0.3758(3) 0.0193(18) Uani 1 1 d . . . 
C49 C -0.9022(5) -0.1381(11) -0.5263(4) 0.026(2) Uani 1 1 d . . . 
C50 C -0.9696(5) -0.2455(11) -0.5229(4) 0.033(2) Uani 1 1 d . . . 
H50 H -0.9598 -0.3267 -0.4922 0.039 Uiso 1 1 calc R . . 
C51 C -1.0486(5) -0.2287(12) -0.5648(4) 0.037(2) Uani 1 1 d . . . 
H51 H -1.0933 -0.3009 -0.5629 0.045 Uiso 1 1 calc R . . 
C52 C -1.0662(5) -0.1114(12) -0.6096(4) 0.039(2) Uani 1 1 d . . . 
H52 H -1.1215 -0.1042 -0.6383 0.047 Uiso 1 1 calc R . . 
C53 C -1.0031(5) -0.0066(11) -0.6118(4) 0.037(2) Uani 1 1 d . . . 
H53 H -1.0147 0.0765 -0.6416 0.045 Uiso 1 1 calc R . . 
C54 C -0.9212(5) -0.0204(11) -0.5706(4) 0.032(2) Uani 1 1 d . . . 
H54 H -0.8774 0.0531 -0.5731 0.039 Uiso 1 1 calc R . . 
C55 C -0.2555(5) -0.2041(10) -0.3941(4) 0.028(2) Uani 1 1 d . . . 
C56 C -0.2119(5) -0.2193(12) -0.3315(4) 0.045(3) Uani 1 1 d . . . 
H56 H -0.2423 -0.2598 -0.3013 0.055 Uiso 1 1 calc R . . 
C57 C -0.1256(5) -0.1788(12) -0.3100(4) 0.059(3) Uani 1 1 d . . . 
H57 H -0.0974 -0.1926 -0.2659 0.070 Uiso 1 1 calc R . . 
C58 C -0.0793(5) -0.1162(10) -0.3543(4) 0.030(2) Uani 1 1 d . . . 
C59 C -0.1222(5) -0.1050(9) -0.4169(4) 0.030(2) Uani 1 1 d . . . 
H59 H -0.0916 -0.0679 -0.4477 0.035 Uiso 1 1 calc R . . 
C60 C -0.2104(5) -0.1462(9) -0.4382(4) 0.027(2) Uani 1 1 d . . . 
H60 H -0.2388 -0.1345 -0.4823 0.032 Uiso 1 1 calc R . . 
C61 C 0.0160(5) -0.0778(9) -0.3332(4) 0.0340(19) Uani 1 1 d . . . 
H61 H 0.0482 -0.0690 -0.3659 0.041 Uiso 1 1 calc R . . 
C62 C 0.0584(5) -0.0553(8) -0.2731(3) 0.0382(18) Uani 1 1 d . . . 
H62 H 0.0244 -0.0640 -0.2414 0.046 Uiso 1 1 calc R . . 
C63 C 0.1522(3) -0.0181(6) -0.2476(3) 0.0314(12) Uani 1 1 d . . . 
H63 H 0.1768 -0.1013 -0.2164 0.038 Uiso 1 1 calc R . . 
C64 C 0.1607(5) 0.1318(10) -0.2098(4) 0.0393(19) Uani 1 1 d . . . 
H64A H 0.1162 0.1337 -0.1833 0.047 Uiso 1 1 calc R . . 
H64B H 0.1485 0.2188 -0.2406 0.047 Uiso 1 1 calc R . . 
C65 C 0.2515(5) 0.1545(10) -0.1652(4) 0.046(2) Uani 1 1 d . . . 
H65A H 0.2957 0.1561 -0.1912 0.069 Uiso 1 1 calc R . . 
H65B H 0.2636 0.0697 -0.1341 0.069 Uiso 1 1 calc R . . 
H65C H 0.2528 0.2523 -0.1420 0.069 Uiso 1 1 calc R . . 
C66 C 0.2052(5) -0.0171(11) -0.3000(4) 0.051(2) Uani 1 1 d . . . 
H66A H 0.2668 -0.0002 -0.2800 0.077 Uiso 1 1 calc R . . 
H66B H 0.1843 0.0657 -0.3309 0.077 Uiso 1 1 calc R . . 
H66C H 0.1985 -0.1162 -0.3226 0.077 Uiso 1 1 calc R . . 
  
loop_ 
 _atom_site_aniso_label 
 _atom_site_aniso_U_11 
 _atom_site_aniso_U_22 
 _atom_site_aniso_U_33 
 _atom_site_aniso_U_23 
 _atom_site_aniso_U_13 
 _atom_site_aniso_U_12 
F1 0.022(3) 0.046(3) 0.025(2) 0.005(3) 0.005(2) 0.001(2) 
F2 0.033(3) 0.038(3) 0.025(2) -0.005(3) 0.005(2) -0.016(2) 
F3 0.030(3) 0.056(3) 0.016(2) -0.009(3) 0.004(2) -0.001(3) 
F4 0.035(3) 0.031(3) 0.045(3) 0.016(3) 0.008(3) 0.001(2) 
F5 0.024(3) 0.052(3) 0.027(2) 0.011(3) -0.003(2) -0.006(3) 
F6 0.042(3) 0.032(3) 0.035(3) 0.007(3) 0.024(3) 0.008(2) 
S1 0.0234(12) 0.0296(12) 0.0288(11) 0.0015(11) 0.0028(10) -0.0008(9) 
S2 0.0207(12) 0.0296(12) 0.0172(11) 0.0005(10) 0.0034(10) -0.0025(9) 
C1 0.021(4) 0.028(5) 0.017(4) -0.006(4) -0.002(4) 0.005(4) 
C2 0.024(4) 0.025(4) 0.017(4) -0.006(4) 0.013(3) -0.005(3) 
C3 0.015(5) 0.034(5) 0.020(4) -0.002(4) -0.001(4) -0.003(4) 
C4 0.023(5) 0.029(5) 0.026(5) -0.002(4) 0.005(4) 0.010(3) 
C5 0.019(4) 0.016(4) 0.016(4) 0.003(4) 0.009(4) 0.001(3) 
C6 0.012(4) 0.025(4) 0.019(4) 0.004(4) 0.004(4) 0.002(3) 
C7 0.022(4) 0.018(4) 0.016(4) 0.002(4) -0.004(4) 0.000(3) 
C8 0.024(5) 0.024(5) 0.013(4) -0.003(4) -0.001(4) 0.001(4) 
C9 0.025(4) 0.017(4) 0.033(4) -0.007(4) 0.000(4) -0.002(3) 
C10 0.021(5) 0.022(4) 0.022(4) 0.003(4) 0.005(4) 0.001(3) 
C11 0.024(5) 0.022(4) 0.017(4) -0.003(4) -0.004(4) -0.008(3) 
C12 0.026(5) 0.018(4) 0.021(4) 0.003(4) 0.012(4) -0.004(4) 
C13 0.020(4) 0.043(5) 0.015(4) 0.007(4) 0.004(4) -0.008(4) 
C14 0.014(4) 0.023(4) 0.023(4) -0.009(4) -0.005(4) -0.003(3) 
C15 0.028(5) 0.023(4) 0.018(4) -0.002(4) 0.013(4) -0.008(4) 
C16 0.021(5) 0.027(5) 0.025(4) -0.006(4) 0.004(4) 0.001(4) 
C17 0.033(5) 0.041(4) 0.031(5) 0.005(4) 0.005(4) 0.012(4) 
C18 0.022(5) 0.060(6) 0.041(5) -0.005(5) 0.008(5) 0.003(4) 
C19 0.025(5) 0.061(6) 0.026(4) -0.007(5) 0.003(4) 0.012(4) 
C20 0.039(5) 0.037(5) 0.027(4) -0.002(4) 0.003(4) 0.001(4) 
C21 0.024(4) 0.029(4) 0.041(5) -0.004(4) 0.007(4) 0.008(4) 
C22 0.024(5) 0.019(4) 0.021(4) -0.007(4) 0.009(4) -0.006(3) 
C23 0.032(5) 0.038(4) 0.023(4) 0.002(3) 0.012(4) -0.009(3) 
C24 0.027(4) 0.045(4) 0.018(3) -0.006(3) -0.005(3) -0.003(3) 
C25 0.028(4) 0.036(4) 0.035(4) -0.001(4) 0.007(4) -0.014(4) 
C26 0.037(5) 0.051(5) 0.013(3) 0.008(4) 0.003(4) -0.003(4) 
C27 0.024(5) 0.043(5) 0.020(4) 0.002(4) -0.005(4) -0.011(4) 
C28 0.027(4) 0.072(6) 0.027(4) -0.001(4) 0.005(3) -0.010(4) 
C29 0.044(5) 0.133(9) 0.031(4) -0.001(5) 0.004(4) -0.039(5) 
C30 0.037(4) 0.090(5) 0.042(4) 0.026(4) -0.009(3) -0.020(4) 
C31 0.035(5) 0.097(7) 0.053(5) -0.016(5) -0.007(4) -0.011(5) 
C32 0.058(8) 0.197(14) 0.119(10) -0.105(10) 0.011(7) -0.032(8) 
C33 0.046(7) 0.210(14) 0.072(7) -0.057(9) 0.032(6) -0.069(8) 
F7 0.030(3) 0.036(3) 0.024(2) -0.004(3) 0.001(2) -0.008(2) 
F8 0.023(3) 0.047(3) 0.030(2) -0.001(2) 0.018(2) 0.004(2) 
F9 0.033(3) 0.034(3) 0.045(3) 0.005(3) 0.015(3) -0.003(2) 
F10 0.034(3) 0.059(3) 0.016(2) -0.003(3) 0.007(2) 0.008(3) 
F11 0.034(3) 0.034(3) 0.029(3) 0.001(3) 0.008(2) 0.009(2) 
F12 0.023(3) 0.054(3) 0.019(2) 0.009(3) -0.003(2) -0.008(3) 
S3 0.0221(12) 0.0275(12) 0.0290(11) -0.0014(11) 0.0029(10) 0.0036(9) 
S4 0.0219(13) 0.0390(14) 0.0199(11) -0.0016(11) 0.0068(11) -0.0054(10) 
C34 0.022(4) 0.033(5) 0.022(4) 0.002(4) 0.012(4) 0.000(4) 
C35 0.013(4) 0.030(5) 0.017(4) 0.004(4) -0.003(3) 0.008(4) 
C36 0.022(5) 0.024(5) 0.026(5) -0.001(4) 0.010(4) 0.002(4) 
C37 0.020(4) 0.034(5) 0.020(4) -0.004(4) 0.007(4) -0.010(4) 
C38 0.014(4) 0.037(5) 0.034(5) -0.009(5) 0.002(4) 0.001(4) 
C39 0.032(5) 0.021(4) 0.018(4) -0.005(4) 0.009(4) -0.003(4) 
C40 0.023(5) 0.040(5) 0.015(4) -0.002(4) 0.009(4) 0.004(4) 
C41 0.014(5) 0.032(5) 0.019(4) -0.001(4) 0.002(4) -0.004(4) 
C42 0.023(4) 0.037(5) 0.017(4) 0.000(4) 0.000(4) -0.001(4) 
C43 0.025(5) 0.046(6) 0.020(4) -0.002(5) 0.004(4) -0.002(4) 
C44 0.014(4) 0.025(4) 0.015(4) -0.007(4) 0.010(3) 0.001(3) 
C45 0.011(4) 0.047(5) 0.017(4) -0.011(5) 0.000(4) 0.001(4) 
C46 0.033(5) 0.016(4) 0.024(4) -0.010(4) 0.010(4) 0.001(4) 
C47 0.018(4) 0.035(5) 0.017(4) 0.005(4) 0.005(4) 0.001(4) 
C48 0.016(4) 0.025(4) 0.013(4) -0.008(4) -0.006(4) 0.003(3) 
C49 0.020(5) 0.038(5) 0.020(4) -0.002(5) 0.003(4) 0.010(4) 
C50 0.015(4) 0.048(5) 0.036(5) 0.003(4) 0.006(4) -0.007(4) 
C51 0.018(5) 0.061(6) 0.032(5) 0.003(5) 0.003(4) -0.005(4) 
C52 0.013(4) 0.062(6) 0.039(5) -0.015(5) -0.002(4) 0.007(4) 
C53 0.028(5) 0.049(5) 0.033(4) 0.004(5) 0.002(4) 0.027(4) 
C54 0.022(4) 0.050(5) 0.022(4) -0.005(5) 0.000(4) -0.002(4) 
C55 0.012(4) 0.047(5) 0.021(4) 0.000(5) -0.006(4) -0.001(4) 
C56 0.022(5) 0.094(7) 0.019(4) -0.003(5) 0.001(4) -0.025(4) 
C57 0.032(5) 0.121(8) 0.023(4) 0.014(5) 0.007(4) -0.031(5) 
C58 0.021(4) 0.049(5) 0.019(3) -0.006(4) 0.004(3) -0.006(3) 
C59 0.019(4) 0.038(4) 0.034(4) -0.011(4) 0.012(4) -0.016(3) 
C60 0.028(5) 0.035(5) 0.022(4) -0.009(4) 0.013(4) -0.005(4) 
C61 0.022(4) 0.052(4) 0.028(4) -0.002(3) 0.008(3) -0.014(3) 
C62 0.029(4) 0.057(4) 0.030(3) 0.001(3) 0.008(3) -0.004(3) 
C63 0.022(3) 0.041(3) 0.027(3) -0.001(3) -0.003(3) -0.001(3) 
C64 0.024(4) 0.048(4) 0.043(4) -0.011(4) 0.001(3) 0.000(3) 
C65 0.026(5) 0.060(5) 0.041(4) -0.003(4) -0.018(4) -0.002(4) 
C66 0.033(5) 0.080(6) 0.045(5) -0.020(5) 0.018(4) -0.007(5) 
  
_geom_special_details 
; 
 All esds (except the esd in the dihedral angle between two l.s. planes) 
 are estimated using the full covariance matrix.  The cell esds are taken 
 into account individually in the estimation of esds in distances, angles 
 and torsion angles; correlations between esds in cell parameters are only 
 used when they are defined by crystal symmetry.  An approximate (isotropic) 
 treatment of cell esds is used for estimating esds involving l.s. planes. 
; 
  
loop_ 
 _geom_bond_atom_site_label_1 
 _geom_bond_atom_site_label_2 
 _geom_bond_distance 
 _geom_bond_site_symmetry_2 
 _geom_bond_publ_flag 
F1 C12 1.345(8) . ? 
F2 C12 1.353(8) . ? 
F3 C13 1.349(8) . ? 
F4 C13 1.339(9) . ? 
F5 C14 1.385(9) . ? 
F6 C14 1.353(8) . ? 
S1 C4 1.714(9) . ? 
S1 C1 1.733(8) . ? 
S2 C5 1.723(7) . ? 
S2 C8 1.735(8) . ? 
C1 C2 1.383(11) . ? 
C1 C9 1.497(10) . ? 
C2 C11 1.450(11) . ? 
C2 C3 1.457(11) . ? 
C3 C4 1.383(11) . ? 
C4 C16 1.477(10) . ? 
C5 C6 1.391(9) . ? 
C5 C10 1.480(10) . ? 
C6 C7 1.432(11) . ? 
C6 C15 1.497(9) . ? 
C7 C8 1.370(10) . ? 
C8 C22 1.455(11) . ? 
C11 C15 1.326(11) . ? 
C11 C12 1.509(9) . ? 
C12 C13 1.519(11) . ? 
C13 C14 1.540(10) . ? 
C14 C15 1.502(11) . ? 
C16 C17 1.353(11) . ? 
C16 C21 1.407(11) . ? 
C17 C18 1.402(11) . ? 
C18 C19 1.375(12) . ? 
C19 C20 1.378(12) . ? 
C20 C21 1.375(11) . ? 
C22 C27 1.395(9) . ? 
C22 C23 1.424(10) . ? 
C23 C24 1.378(10) . ? 
C24 C25 1.368(10) . ? 
C25 C26 1.405(10) . ? 
C25 C28 1.485(11) . ? 
C26 C27 1.359(11) . ? 
C28 C29 1.262(11) . ? 
C29 C30 1.517(9) . ? 
C30 C33 1.502(12) . ? 
C30 C31 1.510(10) . ? 
C31 C32 1.475(14) . ? 
F7 C45 1.392(9) . ? 
F8 C45 1.370(7) . ? 
F9 C46 1.341(8) . ? 
F10 C46 1.356(8) . ? 
F11 C47 1.365(9) . ? 
F12 C47 1.325(9) . ? 
S3 C34 1.702(8) . ? 
S3 C37 1.753(8) . ? 
S4 C38 1.718(8) . ? 
S4 C41 1.728(8) . ? 
C34 C35 1.366(11) . ? 
C34 C42 1.495(11) . ? 
C35 C36 1.431(11) . ? 
C35 C44 1.475(11) . ? 
C36 C37 1.318(11) . ? 
C37 C49 1.473(10) . ? 
C38 C39 1.363(10) . ? 
C38 C43 1.525(11) . ? 
C39 C40 1.426(11) . ? 
C39 C48 1.445(10) . ? 
C40 C41 1.354(10) . ? 
C41 C55 1.487(11) . ? 
C44 C48 1.389(10) . ? 
C44 C45 1.487(10) . ? 
C45 C46 1.519(11) . ? 
C46 C47 1.541(10) . ? 
C47 C48 1.506(10) . ? 
C49 C54 1.376(12) . ? 
C49 C50 1.427(11) . ? 
C50 C51 1.367(11) . ? 
C51 C52 1.380(12) . ? 
C52 C53 1.356(12) . ? 
C53 C54 1.394(11) . ? 
C55 C56 1.361(10) . ? 
C55 C60 1.388(10) . ? 
C56 C57 1.381(11) . ? 
C57 C58 1.420(10) . ? 
C58 C59 1.356(10) . ? 
C58 C61 1.505(10) . ? 
C59 C60 1.409(11) . ? 
C61 C62 1.319(10) . ? 
C62 C63 1.491(8) . ? 
C63 C64 1.520(9) . ? 
C63 C66 1.532(8) . ? 
C64 C65 1.544(11) . ? 
  
loop_ 
 _geom_angle_atom_site_label_1 
 _geom_angle_atom_site_label_2 
 _geom_angle_atom_site_label_3 
 _geom_angle 
 _geom_angle_site_symmetry_1 
 _geom_angle_site_symmetry_3 
 _geom_angle_publ_flag 
C4 S1 C1 93.1(4) . . ? 
C5 S2 C8 94.2(4) . . ? 
C2 C1 C9 129.2(7) . . ? 
C2 C1 S1 111.7(6) . . ? 
C9 C1 S1 119.0(6) . . ? 
C1 C2 C11 124.3(7) . . ? 
C1 C2 C3 110.9(7) . . ? 
C11 C2 C3 124.8(7) . . ? 
C4 C3 C2 113.5(7) . . ? 
C3 C4 C16 127.1(8) . . ? 
C3 C4 S1 110.8(6) . . ? 
C16 C4 S1 122.1(6) . . ? 
C6 C5 C10 131.2(7) . . ? 
C6 C5 S2 109.0(6) . . ? 
C10 C5 S2 119.8(5) . . ? 
C5 C6 C7 113.8(6) . . ? 
C5 C6 C15 124.8(7) . . ? 
C7 C6 C15 121.4(7) . . ? 
C8 C7 C6 113.2(7) . . ? 
C7 C8 C22 128.4(7) . . ? 
C7 C8 S2 109.8(6) . . ? 
C22 C8 S2 121.7(6) . . ? 
C15 C11 C2 131.2(8) . . ? 
C15 C11 C12 110.9(7) . . ? 
C2 C11 C12 117.9(7) . . ? 
F1 C12 F2 106.5(6) . . ? 
F1 C12 C11 113.2(6) . . ? 
F2 C12 C11 112.4(5) . . ? 
F1 C12 C13 110.6(6) . . ? 
F2 C12 C13 109.8(6) . . ? 
C11 C12 C13 104.3(6) . . ? 
F4 C13 F3 107.3(6) . . ? 
F4 C13 C12 114.6(7) . . ? 
F3 C13 C12 110.2(7) . . ? 
F4 C13 C14 111.7(7) . . ? 
F3 C13 C14 109.4(6) . . ? 
C12 C13 C14 103.4(6) . . ? 
F6 C14 F5 104.7(6) . . ? 
F6 C14 C15 112.3(6) . . ? 
F5 C14 C15 112.3(6) . . ? 
F6 C14 C13 111.9(6) . . ? 
F5 C14 C13 110.6(6) . . ? 
C15 C14 C13 105.2(6) . . ? 
C11 C15 C6 129.6(8) . . ? 
C11 C15 C14 110.6(7) . . ? 
C6 C15 C14 119.8(7) . . ? 
C17 C16 C21 118.5(8) . . ? 
C17 C16 C4 122.3(8) . . ? 
C21 C16 C4 119.2(7) . . ? 
C16 C17 C18 122.4(9) . . ? 
C19 C18 C17 118.2(9) . . ? 
C18 C19 C20 120.5(8) . . ? 
C21 C20 C19 120.6(8) . . ? 
C20 C21 C16 119.8(8) . . ? 
C27 C22 C23 117.1(7) . . ? 
C27 C22 C8 122.4(7) . . ? 
C23 C22 C8 120.5(7) . . ? 
C24 C23 C22 119.5(7) . . ? 
C25 C24 C23 123.0(8) . . ? 
C24 C25 C26 117.2(7) . . ? 
C24 C25 C28 123.2(8) . . ? 
C26 C25 C28 119.6(7) . . ? 
C27 C26 C25 121.4(8) . . ? 
C26 C27 C22 121.7(8) . . ? 
C29 C28 C25 128.0(8) . . ? 
C28 C29 C30 129.2(7) . . ? 
C33 C30 C31 112.0(7) . . ? 
C33 C30 C29 113.3(7) . . ? 
C31 C30 C29 109.9(6) . . ? 
C32 C31 C30 115.1(8) . . ? 
C34 S3 C37 92.5(4) . . ? 
C38 S4 C41 92.3(4) . . ? 
C35 C34 C42 129.1(8) . . ? 
C35 C34 S3 110.2(6) . . ? 
C42 C34 S3 120.6(6) . . ? 
C34 C35 C36 113.2(7) . . ? 
C34 C35 C44 125.0(7) . . ? 
C36 C35 C44 121.7(7) . . ? 
C37 C36 C35 113.5(8) . . ? 
C36 C37 C49 131.4(8) . . ? 
C36 C37 S3 110.5(6) . . ? 
C49 C37 S3 118.2(7) . . ? 
C39 C38 C43 130.6(8) . . ? 
C39 C38 S4 112.0(7) . . ? 
C43 C38 S4 117.4(6) . . ? 
C38 C39 C40 110.9(7) . . ? 
C38 C39 C48 125.9(8) . . ? 
C40 C39 C48 123.1(7) . . ? 
C41 C40 C39 115.0(7) . . ? 
C40 C41 C55 128.3(7) . . ? 
C40 C41 S4 109.7(6) . . ? 
C55 C41 S4 122.0(6) . . ? 
C48 C44 C35 129.3(7) . . ? 
C48 C44 C45 109.1(7) . . ? 
C35 C44 C45 121.6(6) . . ? 
F8 C45 F7 104.7(6) . . ? 
F8 C45 C44 113.7(7) . . ? 
F7 C45 C44 110.5(5) . . ? 
F8 C45 C46 112.6(6) . . ? 
F7 C45 C46 108.8(6) . . ? 
C44 C45 C46 106.6(6) . . ? 
F9 C46 F10 106.9(7) . . ? 
F9 C46 C45 113.6(7) . . ? 
F10 C46 C45 108.2(6) . . ? 
F9 C46 C47 114.5(6) . . ? 
F10 C46 C47 109.3(6) . . ? 
C45 C46 C47 104.2(6) . . ? 
F12 C47 F11 106.0(6) . . ? 
F12 C47 C48 115.9(7) . . ? 
F11 C47 C48 111.8(6) . . ? 
F12 C47 C46 110.1(6) . . ? 
F11 C47 C46 107.7(6) . . ? 
C48 C47 C46 105.2(7) . . ? 
C44 C48 C39 130.4(7) . . ? 
C44 C48 C47 110.7(7) . . ? 
C39 C48 C47 118.9(7) . . ? 
C54 C49 C50 118.0(8) . . ? 
C54 C49 C37 123.5(8) . . ? 
C50 C49 C37 118.5(8) . . ? 
C51 C50 C49 118.4(9) . . ? 
C50 C51 C52 122.8(9) . . ? 
C53 C52 C51 118.9(8) . . ? 
C52 C53 C54 120.2(9) . . ? 
C49 C54 C53 121.6(9) . . ? 
C56 C55 C60 118.1(7) . . ? 
C56 C55 C41 119.3(8) . . ? 
C60 C55 C41 122.6(7) . . ? 
C55 C56 C57 123.1(8) . . ? 
C56 C57 C58 119.3(8) . . ? 
C59 C58 C57 117.4(7) . . ? 
C59 C58 C61 121.6(7) . . ? 
C57 C58 C61 120.8(7) . . ? 
C58 C59 C60 122.6(7) . . ? 
C55 C60 C59 119.4(8) . . ? 
C62 C61 C58 125.4(7) . . ? 
C61 C62 C63 129.2(6) . . ? 
C62 C63 C64 110.0(5) . . ? 
C62 C63 C66 113.2(5) . . ? 
C64 C63 C66 112.4(6) . . ? 
C63 C64 C65 113.3(6) . . ? 
  
loop_ 
 _geom_torsion_atom_site_label_1 
 _geom_torsion_atom_site_label_2 
 _geom_torsion_atom_site_label_3 
 _geom_torsion_atom_site_label_4 
 _geom_torsion 
 _geom_torsion_site_symmetry_1 
 _geom_torsion_site_symmetry_2 
 _geom_torsion_site_symmetry_3 
 _geom_torsion_site_symmetry_4 
 _geom_torsion_publ_flag 
C4 S1 C1 C2 -0.9(6) . . . . ? 
C4 S1 C1 C9 178.5(6) . . . . ? 
C9 C1 C2 C11 2.7(13) . . . . ? 
S1 C1 C2 C11 -178.0(6) . . . . ? 
C9 C1 C2 C3 -178.0(7) . . . . ? 
S1 C1 C2 C3 1.3(8) . . . . ? 
C1 C2 C3 C4 -1.2(9) . . . . ? 
C11 C2 C3 C4 178.1(7) . . . . ? 
C2 C3 C4 C16 -178.4(7) . . . . ? 
C2 C3 C4 S1 0.5(9) . . . . ? 
C1 S1 C4 C3 0.2(6) . . . . ? 
C1 S1 C4 C16 179.2(6) . . . . ? 
C8 S2 C5 C6 0.5(6) . . . . ? 
C8 S2 C5 C10 -179.5(6) . . . . ? 
C10 C5 C6 C7 -179.6(7) . . . . ? 
S2 C5 C6 C7 0.4(8) . . . . ? 
C10 C5 C6 C15 0.0(13) . . . . ? 
S2 C5 C6 C15 179.9(6) . . . . ? 
C5 C6 C7 C8 -1.4(10) . . . . ? 
C15 C6 C7 C8 179.0(7) . . . . ? 
C6 C7 C8 C22 -175.5(7) . . . . ? 
C6 C7 C8 S2 1.7(9) . . . . ? 
C5 S2 C8 C7 -1.3(6) . . . . ? 
C5 S2 C8 C22 176.1(7) . . . . ? 
C1 C2 C11 C15 40.6(13) . . . . ? 
C3 C2 C11 C15 -138.6(9) . . . . ? 
C1 C2 C11 C12 -140.9(7) . . . . ? 
C3 C2 C11 C12 39.9(10) . . . . ? 
C15 C11 C12 F1 -140.6(7) . . . . ? 
C2 C11 C12 F1 40.6(9) . . . . ? 
C15 C11 C12 F2 98.7(8) . . . . ? 
C2 C11 C12 F2 -80.1(8) . . . . ? 
C15 C11 C12 C13 -20.3(8) . . . . ? 
C2 C11 C12 C13 160.9(6) . . . . ? 
F1 C12 C13 F4 -92.8(8) . . . . ? 
F2 C12 C13 F4 24.4(8) . . . . ? 
C11 C12 C13 F4 145.1(6) . . . . ? 
F1 C12 C13 F3 28.3(8) . . . . ? 
F2 C12 C13 F3 145.6(5) . . . . ? 
C11 C12 C13 F3 -93.7(7) . . . . ? 
F1 C12 C13 C14 145.3(6) . . . . ? 
F2 C12 C13 C14 -97.5(7) . . . . ? 
C11 C12 C13 C14 23.2(7) . . . . ? 
F4 C13 C14 F6 -20.8(9) . . . . ? 
F3 C13 C14 F6 -139.4(7) . . . . ? 
C12 C13 C14 F6 103.1(7) . . . . ? 
F4 C13 C14 F5 95.6(8) . . . . ? 
F3 C13 C14 F5 -23.1(9) . . . . ? 
C12 C13 C14 F5 -140.6(6) . . . . ? 
F4 C13 C14 C15 -143.0(7) . . . . ? 
F3 C13 C14 C15 98.3(7) . . . . ? 
C12 C13 C14 C15 -19.2(8) . . . . ? 
C2 C11 C15 C6 9.5(15) . . . . ? 
C12 C11 C15 C6 -169.1(7) . . . . ? 
C2 C11 C15 C14 -173.4(7) . . . . ? 
C12 C11 C15 C14 7.9(9) . . . . ? 
C5 C6 C15 C11 38.9(13) . . . . ? 
C7 C6 C15 C11 -141.6(9) . . . . ? 
C5 C6 C15 C14 -137.9(8) . . . . ? 
C7 C6 C15 C14 41.6(10) . . . . ? 
F6 C14 C15 C11 -114.4(7) . . . . ? 
F5 C14 C15 C11 127.8(7) . . . . ? 
C13 C14 C15 C11 7.5(9) . . . . ? 
F6 C14 C15 C6 62.9(9) . . . . ? 
F5 C14 C15 C6 -54.8(9) . . . . ? 
C13 C14 C15 C6 -175.1(7) . . . . ? 
C3 C4 C16 C17 -26.5(13) . . . . ? 
S1 C4 C16 C17 154.7(7) . . . . ? 
C3 C4 C16 C21 155.4(8) . . . . ? 
S1 C4 C16 C21 -23.4(10) . . . . ? 
C21 C16 C17 C18 -2.3(13) . . . . ? 
C4 C16 C17 C18 179.6(8) . . . . ? 
C16 C17 C18 C19 2.2(13) . . . . ? 
C17 C18 C19 C20 -1.5(13) . . . . ? 
C18 C19 C20 C21 0.9(13) . . . . ? 
C19 C20 C21 C16 -1.0(12) . . . . ? 
C17 C16 C21 C20 1.7(12) . . . . ? 
C4 C16 C21 C20 179.8(8) . . . . ? 
C7 C8 C22 C27 -175.0(8) . . . . ? 
S2 C8 C22 C27 8.1(11) . . . . ? 
C7 C8 C22 C23 4.2(13) . . . . ? 
S2 C8 C22 C23 -172.8(6) . . . . ? 
C27 C22 C23 C24 0.6(12) . . . . ? 
C8 C22 C23 C24 -178.6(7) . . . . ? 
C22 C23 C24 C25 -0.9(13) . . . . ? 
C23 C24 C25 C26 0.5(13) . . . . ? 
C23 C24 C25 C28 -177.9(8) . . . . ? 
C24 C25 C26 C27 0.2(14) . . . . ? 
C28 C25 C26 C27 178.6(9) . . . . ? 
C25 C26 C27 C22 -0.4(15) . . . . ? 
C23 C22 C27 C26 0.0(13) . . . . ? 
C8 C22 C27 C26 179.2(8) . . . . ? 
C24 C25 C28 C29 18.6(16) . . . . ? 
C26 C25 C28 C29 -159.8(10) . . . . ? 
C25 C28 C29 C30 178.0(9) . . . . ? 
C28 C29 C30 C33 47.2(14) . . . . ? 
C28 C29 C30 C31 173.3(10) . . . . ? 
C33 C30 C31 C32 -61.5(12) . . . . ? 
C29 C30 C31 C32 171.6(9) . . . . ? 
C37 S3 C34 C35 0.5(6) . . . . ? 
C37 S3 C34 C42 -176.7(6) . . . . ? 
C42 C34 C35 C36 174.8(7) . . . . ? 
S3 C34 C35 C36 -2.2(8) . . . . ? 
C42 C34 C35 C44 -1.8(13) . . . . ? 
S3 C34 C35 C44 -178.7(5) . . . . ? 
C34 C35 C36 C37 3.4(10) . . . . ? 
C44 C35 C36 C37 -179.9(7) . . . . ? 
C35 C36 C37 C49 177.7(7) . . . . ? 
C35 C36 C37 S3 -2.9(9) . . . . ? 
C34 S3 C37 C36 1.4(6) . . . . ? 
C34 S3 C37 C49 -179.1(6) . . . . ? 
C41 S4 C38 C39 -1.0(7) . . . . ? 
C41 S4 C38 C43 178.2(6) . . . . ? 
C43 C38 C39 C40 -178.7(8) . . . . ? 
S4 C38 C39 C40 0.3(9) . . . . ? 
C43 C38 C39 C48 1.8(15) . . . . ? 
S4 C38 C39 C48 -179.1(6) . . . . ? 
C38 C39 C40 C41 0.7(11) . . . . ? 
C48 C39 C40 C41 -179.8(7) . . . . ? 
C39 C40 C41 C55 179.7(8) . . . . ? 
C39 C40 C41 S4 -1.4(9) . . . . ? 
C38 S4 C41 C40 1.3(6) . . . . ? 
C38 S4 C41 C55 -179.7(7) . . . . ? 
C34 C35 C44 C48 -41.6(12) . . . . ? 
C36 C35 C44 C48 142.1(8) . . . . ? 
C34 C35 C44 C45 138.2(8) . . . . ? 
C36 C35 C44 C45 -38.1(10) . . . . ? 
C48 C44 C45 F8 143.1(6) . . . . ? 
C35 C44 C45 F8 -36.7(9) . . . . ? 
C48 C44 C45 F7 -99.5(7) . . . . ? 
C35 C44 C45 F7 80.6(8) . . . . ? 
C48 C44 C45 C46 18.5(8) . . . . ? 
C35 C44 C45 C46 -161.3(6) . . . . ? 
F8 C45 C46 F9 88.3(8) . . . . ? 
F7 C45 C46 F9 -27.2(8) . . . . ? 
C44 C45 C46 F9 -146.4(6) . . . . ? 
F8 C45 C46 F10 -30.2(9) . . . . ? 
F7 C45 C46 F10 -145.7(5) . . . . ? 
C44 C45 C46 F10 95.1(7) . . . . ? 
F8 C45 C46 C47 -146.4(7) . . . . ? 
F7 C45 C46 C47 98.1(7) . . . . ? 
C44 C45 C46 C47 -21.1(7) . . . . ? 
F9 C46 C47 F12 -93.5(8) . . . . ? 
F10 C46 C47 F12 26.3(9) . . . . ? 
C45 C46 C47 F12 141.8(7) . . . . ? 
F9 C46 C47 F11 21.7(9) . . . . ? 
F10 C46 C47 F11 141.5(6) . . . . ? 
C45 C46 C47 F11 -103.0(7) . . . . ? 
F9 C46 C47 C48 141.0(7) . . . . ? 
F10 C46 C47 C48 -99.2(7) . . . . ? 
C45 C46 C47 C48 16.3(8) . . . . ? 
C35 C44 C48 C39 -9.7(14) . . . . ? 
C45 C44 C48 C39 170.4(7) . . . . ? 
C35 C44 C48 C47 171.9(7) . . . . ? 
C45 C44 C48 C47 -7.9(8) . . . . ? 
C38 C39 C48 C44 -38.5(14) . . . . ? 
C40 C39 C48 C44 142.1(9) . . . . ? 
C38 C39 C48 C47 139.7(8) . . . . ? 
C40 C39 C48 C47 -39.7(11) . . . . ? 
F12 C47 C48 C44 -127.4(7) . . . . ? 
F11 C47 C48 C44 110.9(7) . . . . ? 
C46 C47 C48 C44 -5.6(8) . . . . ? 
F12 C47 C48 C39 54.0(9) . . . . ? 
F11 C47 C48 C39 -67.7(9) . . . . ? 
C46 C47 C48 C39 175.8(7) . . . . ? 
C36 C37 C49 C54 -156.1(9) . . . . ? 
S3 C37 C49 C54 24.5(10) . . . . ? 
C36 C37 C49 C50 22.0(13) . . . . ? 
S3 C37 C49 C50 -157.4(6) . . . . ? 
C54 C49 C50 C51 1.8(12) . . . . ? 
C37 C49 C50 C51 -176.4(8) . . . . ? 
C49 C50 C51 C52 -0.9(13) . . . . ? 
C50 C51 C52 C53 -0.9(13) . . . . ? 
C51 C52 C53 C54 1.7(13) . . . . ? 
C50 C49 C54 C53 -1.0(12) . . . . ? 
C37 C49 C54 C53 177.1(8) . . . . ? 
C52 C53 C54 C49 -0.8(12) . . . . ? 
C40 C41 C55 C56 -2.3(14) . . . . ? 
S4 C41 C55 C56 179.0(7) . . . . ? 
C40 C41 C55 C60 177.0(8) . . . . ? 
S4 C41 C55 C60 -1.8(12) . . . . ? 
C60 C55 C56 C57 0.6(15) . . . . ? 
C41 C55 C56 C57 179.9(9) . . . . ? 
C55 C56 C57 C58 0.8(16) . . . . ? 
C56 C57 C58 C59 -2.5(14) . . . . ? 
C56 C57 C58 C61 -177.1(9) . . . . ? 
C57 C58 C59 C60 2.9(14) . . . . ? 
C61 C58 C59 C60 177.4(8) . . . . ? 
C56 C55 C60 C59 -0.3(13) . . . . ? 
C41 C55 C60 C59 -179.6(8) . . . . ? 
C58 C59 C60 C55 -1.5(13) . . . . ? 
C59 C58 C61 C62 165.5(8) . . . . ? 
C57 C58 C61 C62 -20.2(14) . . . . ? 
C58 C61 C62 C63 179.5(7) . . . . ? 
C61 C62 C63 C64 122.4(9) . . . . ? 
C61 C62 C63 C66 -4.2(11) . . . . ? 
C62 C63 C64 C65 162.6(6) . . . . ? 
C66 C63 C64 C65 -70.3(8) . . . . ? 
  
_diffrn_measured_fraction_theta_max    0.822 
_diffrn_reflns_theta_full              27.52 
_diffrn_measured_fraction_theta_full   0.822 
_refine_diff_density_max    0.340 
_refine_diff_density_min   -0.298 
_refine_diff_density_rms    0.061 
  
#===END

data_beta-S-1a 
  
_audit_creation_method            SHELXL-97 
_chemical_name_systematic 
; 
(S)-1-(2-methyl-5-pheneyl-3-thienyl)-
2-[2-methyl-5-(4-(3-methyl-1-penten-1-yl)phenyl)-
3-thienyl]perfluorocyclopenentene
; 
_publ_requested_journal
'Organic Letters '
_publ_section_title 
' '
_publ_section_abstract
' '

_publ_contact_author
;Prof. Masahiro. Irie
Department of Chemistry and Biochemistry
Graduate School of Engineering, Kyushu University
Hakozaki 6-10-1, Higashi-ku, Fukuoka, Japan
;
_publ_contact_author_phone            ' 81(92)6423556 '
_publ_contact_author_fax              ' 81(92)6423568 '
_publ_contact_author_email            ' irie@cstf.kyushu-u.ac.jp'

loop_
_publ_author_name
_publ_author_address
'Mr. Satoshi Yamamoto'
;Department of Chemistry and Biochemistry
Graduate School of Engineering, Kyushu University
Hakozaki 6-10-1, Higashi-ku, Fukuoka, Japan
;
'Dr. Kenji Matsuda'
;Department of Chemistry and Biochemistry
Graduate School of Engineering, Kyushu University
Hakozaki 6-10-1, Higashi-ku, Fukuoka, Japan
;
'Prof. Masahiro. Irie'
;Department of Chemistry and Biochemistry
Graduate School of Engineering, Kyushu University
Hakozaki 6-10-1, Higashi-ku, Fukuoka, Japan
;
_chemical_name_common             ? 
_chemical_melting_point           127-130 
_chemical_formula_moiety          ? 
_chemical_formula_sum 
 'C33 H28 F6 S2' 
_chemical_formula_weight          602.67 
  
loop_ 
 _atom_type_symbol 
 _atom_type_description 
 _atom_type_scat_dispersion_real 
 _atom_type_scat_dispersion_imag 
 _atom_type_scat_source 
 'C'  'C'   0.0033   0.0016 
 'International Tables Vol C Tables 4.2.6.8 and 6.1.1.4' 
 'H'  'H'   0.0000   0.0000 
 'International Tables Vol C Tables 4.2.6.8 and 6.1.1.4' 
 'F'  'F'   0.0171   0.0103 
 'International Tables Vol C Tables 4.2.6.8 and 6.1.1.4' 
 'S'  'S'   0.1246   0.1234 
 'International Tables Vol C Tables 4.2.6.8 and 6.1.1.4' 
  
_symmetry_cell_setting            Monoclinic 
_symmetry_space_group_name_H-M    P2(1) 
  
loop_ 
 _symmetry_equiv_pos_as_xyz 
 'x, y, z' 
 '-x, y+1/2, -z' 
  
_cell_length_a                    10.3986(16) 
_cell_length_b                    8.6686(13) 
_cell_length_c                    16.054(3) 
_cell_angle_alpha                 90.00 
_cell_angle_beta                  100.890(3) 
_cell_angle_gamma                 90.00 
_cell_volume                      1421.1(4) 
_cell_formula_units_Z             2 
_cell_measurement_temperature     147(2) 
_cell_measurement_reflns_used     ? 
_cell_measurement_theta_min       1.29 
_cell_measurement_theta_max       27.52 
  
_exptl_crystal_description        plate 
_exptl_crystal_colour             colorless 
_exptl_crystal_size_max           0.8 
_exptl_crystal_size_mid           0.4 
_exptl_crystal_size_min           0.1 
_exptl_crystal_density_meas       ? 
_exptl_crystal_density_diffrn     1.408 
_exptl_crystal_density_method     'not measured' 
_exptl_crystal_F_000              624 
_exptl_absorpt_coefficient_mu     0.249 
_exptl_absorpt_correction_type    'multi-scan' 
_exptl_absorpt_correction_T_min   0.879458 
_exptl_absorpt_correction_T_max   1.000000 
_exptl_absorpt_process_details    'Bruker SADABS'  
  
_exptl_special_details 
; 
 ? 
; 
  
_diffrn_ambient_temperature       147(2) 
_diffrn_radiation_wavelength      0.71073 
_diffrn_radiation_type            MoK\a 
_diffrn_radiation_source          'sealed tube' 
_diffrn_radiation_monochromator   graphite 
_diffrn_measurement_device_type   'CCD area detector' 
_diffrn_measurement_method        'omega scans'  
_diffrn_detector_area_resol_mean  ? 
_diffrn_standards_number          ? 
_diffrn_standards_interval_count  ? 
_diffrn_standards_interval_time   ? 
_diffrn_standards_decay_%         0.22 
_diffrn_reflns_number             8479 
_diffrn_reflns_av_R_equivalents   0.0198 
_diffrn_reflns_av_sigmaI/netI     0.0413 
_diffrn_reflns_limit_h_min        -12 
_diffrn_reflns_limit_h_max        12 
_diffrn_reflns_limit_k_min        -10 
_diffrn_reflns_limit_k_max        11 
_diffrn_reflns_limit_l_min        -20 
_diffrn_reflns_limit_l_max        14 
_diffrn_reflns_theta_min          1.29 
_diffrn_reflns_theta_max          27.52 
_reflns_number_total              5713 
_reflns_number_gt                 4964 
_reflns_threshold_expression      >2sigma(I) 
  
_computing_data_collection        'Bruker SMART' 
_computing_cell_refinement        'Bruker SMART' 
_computing_data_reduction         'Bruker SHELXTL' 
_computing_structure_solution     'SHELXS-97 (Sheldrick, 1990)' 
_computing_structure_refinement   'SHELXL-97 (Sheldrick, 1997)' 
_computing_molecular_graphics     'Bruker SHELXTL' 
_computing_publication_material   'Bruker SHELXTL' 
  
_refine_special_details 
; 
 Refinement of F^2^ against ALL reflections.  The weighted R-factor wR and 
 goodness of fit S are based on F^2^, conventional R-factors R are based 
 on F, with F set to zero for negative F^2^. The threshold expression of 
 F^2^ > 2sigma(F^2^) is used only for calculating R-factors(gt) etc. and is 
 not relevant to the choice of reflections for refinement.  R-factors based 
 on F^2^ are statistically about twice as large as those based on F, and R- 
 factors based on ALL data will be even larger. 
; 
  
_refine_ls_structure_factor_coef  Fsqd 
_refine_ls_matrix_type            full 
_refine_ls_weighting_scheme       calc 
_refine_ls_weighting_details 
 'calc w=1/[\s^2^(Fo^2^)+(0.0505P)^2^+0.0000P] where P=(Fo^2^+2Fc^2^)/3' 
_atom_sites_solution_primary      direct 
_atom_sites_solution_secondary    difmap 
_atom_sites_solution_hydrogens    geom 
_refine_ls_hydrogen_treatment     mixed 
_refine_ls_extinction_method      none 
_refine_ls_extinction_coef        ? 
_refine_ls_abs_structure_details 
 'Flack H D (1983), Acta Cryst. A39, 876-881' 
_refine_ls_abs_structure_Flack    -0.02(5) 
_refine_ls_number_reflns          5713 
_refine_ls_number_parameters      374 
_refine_ls_number_restraints      1 
_refine_ls_R_factor_all           0.0455 
_refine_ls_R_factor_gt            0.0351 
_refine_ls_wR_factor_ref          0.0833 
_refine_ls_wR_factor_gt           0.0791 
_refine_ls_goodness_of_fit_ref    0.987 
_refine_ls_restrained_S_all       0.987 
_refine_ls_shift/su_max           0.001 
_refine_ls_shift/su_mean          0.000 
  
loop_ 
 _atom_site_label 
 _atom_site_type_symbol 
 _atom_site_fract_x 
 _atom_site_fract_y 
 _atom_site_fract_z 
 _atom_site_U_iso_or_equiv 
 _atom_site_adp_type 
 _atom_site_occupancy 
 _atom_site_symmetry_multiplicity 
 _atom_site_calc_flag 
 _atom_site_refinement_flags 
 _atom_site_disorder_assembly 
 _atom_site_disorder_group 
C1 C 0.9477(2) 0.6123(3) 0.50565(14) 0.0194(5) Uani 1 1 d . . . 
C2 C 0.8165(2) 0.5724(2) 0.49362(14) 0.0184(5) Uani 1 1 d . . . 
C3 C 0.7485(2) 0.6048(3) 0.40930(14) 0.0214(5) Uani 1 1 d . . . 
H3 H 0.6580 0.5834 0.3908 0.026 Uiso 1 1 calc R . . 
C4 C 0.8238(2) 0.6684(3) 0.35808(14) 0.0196(5) Uani 1 1 d . . . 
C14 C 1.0541(2) 0.6010(3) 0.58215(15) 0.0237(5) Uani 1 1 d . . . 
H14A H 1.0674 0.7020 0.6098 0.036 Uiso 1 1 calc R . . 
H14B H 1.1354 0.5680 0.5650 0.036 Uiso 1 1 calc R . . 
H14C H 1.0294 0.5256 0.6218 0.036 Uiso 1 1 calc R . . 
S1 S 0.98338(5) 0.68734(7) 0.41285(3) 0.02177(13) Uani 1 1 d . . . 
C5 C 0.7515(2) 0.5033(3) 0.55817(15) 0.0201(5) Uani 1 1 d . . . 
C6 C 0.6549(2) 0.3740(3) 0.53319(15) 0.0220(5) Uani 1 1 d . . . 
C7 C 0.5964(2) 0.3411(3) 0.61215(16) 0.0236(5) Uani 1 1 d . . . 
C8 C 0.6963(2) 0.4122(3) 0.68462(14) 0.0220(4) Uani 1 1 d . . . 
C9 C 0.7673(2) 0.5313(2) 0.64262(14) 0.0194(5) Uani 1 1 d . . . 
F1 F 0.55780(12) 0.40807(19) 0.46624(8) 0.0323(3) Uani 1 1 d . . . 
F2 F 0.71313(13) 0.24435(15) 0.50980(9) 0.0287(3) Uani 1 1 d . . . 
F3 F 0.48093(12) 0.4143(2) 0.60608(9) 0.0338(3) Uani 1 1 d . . . 
F4 F 0.57539(13) 0.18991(18) 0.62361(9) 0.0318(3) Uani 1 1 d . . . 
F5 F 0.63754(13) 0.46840(16) 0.74644(9) 0.0305(3) Uani 1 1 d . . . 
F6 F 0.77969(13) 0.29907(16) 0.72192(9) 0.0292(3) Uani 1 1 d . . . 
C10 C 0.8386(2) 0.8061(3) 0.66939(15) 0.0222(5) Uani 1 1 d . . . 
C11 C 0.8384(2) 0.6547(3) 0.69444(14) 0.0197(5) Uani 1 1 d . . . 
C12 C 0.9121(2) 0.6291(3) 0.77837(14) 0.0220(5) Uani 1 1 d . . . 
H12 H 0.9193 0.5312 0.8055 0.026 Uiso 1 1 calc R . . 
C13 C 0.9707(2) 0.7589(3) 0.81528(15) 0.0220(5) Uani 1 1 d . . . 
C15 C 0.7693(2) 0.8805(3) 0.58979(15) 0.0266(6) Uani 1 1 d . . . 
H15A H 0.8261 0.8794 0.5475 0.040 Uiso 1 1 calc R . . 
H15B H 0.7478 0.9873 0.6017 0.040 Uiso 1 1 calc R . . 
H15C H 0.6886 0.8236 0.5678 0.040 Uiso 1 1 calc R . . 
S2 S 0.93310(6) 0.91576(7) 0.74764(4) 0.02456(13) Uani 1 1 d . . . 
C16 C 0.7837(2) 0.7178(3) 0.26897(14) 0.0211(5) Uani 1 1 d . . . 
C17 C 0.6528(2) 0.7070(3) 0.22963(15) 0.0310(6) Uani 1 1 d . . . 
H17 H 0.5901 0.6714 0.2612 0.037 Uiso 1 1 calc R . . 
C18 C 0.6125(2) 0.7470(3) 0.14583(15) 0.0323(6) Uani 1 1 d . . . 
H18 H 0.5223 0.7383 0.1210 0.039 Uiso 1 1 calc R . . 
C19 C 0.7002(2) 0.7998(3) 0.09630(15) 0.0242(5) Uani 1 1 d . . . 
C20 C 0.8299(2) 0.8144(3) 0.13653(16) 0.0280(5) Uani 1 1 d . . . 
H20 H 0.8920 0.8531 0.1054 0.034 Uiso 1 1 calc R . . 
C21 C 0.8715(2) 0.7739(3) 0.22108(15) 0.0264(5) Uani 1 1 d . . . 
H21 H 0.9613 0.7848 0.2465 0.032 Uiso 1 1 calc R . . 
C22 C 0.6602(2) 0.8343(3) 0.00523(15) 0.0265(5) Uani 1 1 d . . . 
H22 H 0.7239 0.8787 -0.0228 0.032 Uiso 1 1 calc R . . 
C23 C 0.5424(2) 0.8083(3) -0.04056(15) 0.0289(6) Uani 1 1 d . . . 
H23 H 0.4795 0.7697 -0.0099 0.035 Uiso 1 1 calc R . . 
C24 C 0.4935(2) 0.8309(3) -0.13429(15) 0.0291(6) Uani 1 1 d . . . 
H24 H 0.4270 0.9154 -0.1407 0.035 Uiso 1 1 calc R . . 
C25 C 0.4221(3) 0.6843(4) -0.17052(16) 0.0394(6) Uani 1 1 d . . . 
H25A H 0.4872 0.6003 -0.1684 0.047 Uiso 1 1 calc R . . 
H25B H 0.3600 0.6538 -0.1337 0.047 Uiso 1 1 calc R . . 
C26 C 0.3470(3) 0.6994(5) -0.2613(2) 0.0630(10) Uani 1 1 d . . . 
H26A H 0.2826 0.7827 -0.2643 0.095 Uiso 1 1 calc R . . 
H26B H 0.3019 0.6022 -0.2789 0.095 Uiso 1 1 calc R . . 
H26C H 0.4083 0.7230 -0.2990 0.095 Uiso 1 1 calc R . . 
C27 C 0.6003(3) 0.8814(4) -0.18147(17) 0.0405(7) Uani 1 1 d . . . 
H27A H 0.6394 0.9780 -0.1570 0.061 Uiso 1 1 calc R . . 
H27B H 0.5623 0.8972 -0.2415 0.061 Uiso 1 1 calc R . . 
H27C H 0.6680 0.8014 -0.1762 0.061 Uiso 1 1 calc R . . 
C28 C 1.0552(2) 0.7782(3) 0.89951(14) 0.0231(5) Uani 1 1 d . . . 
C29 C 1.0425(2) 0.6761(3) 0.96523(15) 0.0304(5) Uani 1 1 d . . . 
H29 H 0.9791 0.5959 0.9556 0.036 Uiso 1 1 calc R . . 
C30 C 1.1223(2) 0.6923(4) 1.04421(16) 0.0338(6) Uani 1 1 d . . . 
H30 H 1.1140 0.6221 1.0883 0.041 Uiso 1 1 calc R . . 
C31 C 1.2139(2) 0.8095(3) 1.05962(16) 0.0320(6) Uani 1 1 d . . . 
H31 H 1.2682 0.8201 1.1140 0.038 Uiso 1 1 calc R . . 
C32 C 1.2257(2) 0.9112(3) 0.99493(16) 0.0307(5) Uani 1 1 d . . . 
H32 H 1.2884 0.9921 1.0053 0.037 Uiso 1 1 calc R . . 
C33 C 1.1473(2) 0.8964(3) 0.91534(15) 0.0276(5) Uani 1 1 d . . . 
H33 H 1.1564 0.9669 0.8715 0.033 Uiso 1 1 calc R . . 
  
loop_ 
 _atom_site_aniso_label 
 _atom_site_aniso_U_11 
 _atom_site_aniso_U_22 
 _atom_site_aniso_U_33 
 _atom_site_aniso_U_23 
 _atom_site_aniso_U_13 
 _atom_site_aniso_U_12 
C1 0.0208(11) 0.0157(11) 0.0220(12) -0.0004(9) 0.0044(9) -0.0005(9) 
C2 0.0195(11) 0.0176(11) 0.0179(11) -0.0022(9) 0.0029(9) -0.0003(9) 
C3 0.0180(11) 0.0234(12) 0.0222(12) -0.0008(9) 0.0025(9) -0.0004(9) 
C4 0.0197(11) 0.0179(12) 0.0203(11) -0.0005(9) 0.0019(9) 0.0019(9) 
C14 0.0207(11) 0.0290(13) 0.0213(12) 0.0010(10) 0.0034(10) -0.0023(10) 
S1 0.0184(3) 0.0264(3) 0.0202(3) 0.0021(2) 0.0027(2) -0.0019(2) 
C5 0.0163(10) 0.0179(12) 0.0254(13) 0.0018(10) 0.0025(10) 0.0026(9) 
C6 0.0182(11) 0.0252(13) 0.0215(11) 0.0021(9) 0.0005(9) 0.0016(9) 
C7 0.0158(11) 0.0230(12) 0.0316(13) 0.0000(10) 0.0040(10) -0.0015(9) 
C8 0.0224(11) 0.0219(11) 0.0223(11) 0.0022(10) 0.0057(9) 0.0039(10) 
C9 0.0179(11) 0.0175(11) 0.0231(12) 0.0020(9) 0.0046(10) 0.0031(9) 
F1 0.0219(7) 0.0421(8) 0.0287(7) 0.0075(7) -0.0065(6) -0.0069(7) 
F2 0.0316(7) 0.0231(7) 0.0336(8) -0.0074(6) 0.0115(6) -0.0033(6) 
F3 0.0190(6) 0.0451(9) 0.0379(8) -0.0045(8) 0.0065(6) 0.0025(7) 
F4 0.0372(7) 0.0249(7) 0.0346(8) 0.0004(7) 0.0107(6) -0.0125(7) 
F5 0.0338(8) 0.0352(8) 0.0255(8) -0.0025(6) 0.0136(6) -0.0030(6) 
F6 0.0292(7) 0.0250(7) 0.0315(8) 0.0093(6) 0.0005(6) 0.0006(6) 
C10 0.0183(11) 0.0250(12) 0.0227(12) -0.0037(10) 0.0027(9) 0.0004(9) 
C11 0.0172(10) 0.0209(12) 0.0206(12) 0.0002(9) 0.0029(9) 0.0003(8) 
C12 0.0229(11) 0.0230(12) 0.0204(12) 0.0024(9) 0.0051(9) 0.0004(9) 
C13 0.0232(11) 0.0219(12) 0.0212(12) 0.0001(9) 0.0047(10) -0.0002(9) 
C15 0.0276(12) 0.0223(13) 0.0276(13) 0.0020(10) -0.0004(11) 0.0033(10) 
S2 0.0293(3) 0.0195(3) 0.0234(3) -0.0013(3) 0.0013(2) -0.0016(3) 
C16 0.0243(11) 0.0193(13) 0.0190(11) -0.0006(9) 0.0023(9) 0.0020(9) 
C17 0.0223(11) 0.0451(16) 0.0263(13) 0.0058(12) 0.0059(10) -0.0027(12) 
C18 0.0213(12) 0.0499(17) 0.0238(13) 0.0040(12) -0.0003(10) -0.0005(11) 
C19 0.0270(12) 0.0226(12) 0.0229(12) 0.0022(10) 0.0045(10) 0.0017(10) 
C20 0.0282(13) 0.0303(14) 0.0263(13) 0.0064(11) 0.0074(10) -0.0029(10) 
C21 0.0217(11) 0.0304(14) 0.0260(13) 0.0008(10) 0.0015(10) -0.0041(10) 
C22 0.0291(13) 0.0269(13) 0.0236(13) 0.0050(10) 0.0048(11) 0.0011(10) 
C23 0.0276(13) 0.0374(15) 0.0225(12) 0.0032(11) 0.0062(10) 0.0043(11) 
C24 0.0267(13) 0.0377(15) 0.0220(12) 0.0012(11) 0.0024(10) 0.0072(11) 
C25 0.0390(14) 0.0461(16) 0.0315(14) -0.0038(14) 0.0030(12) 0.0034(15) 
C26 0.063(2) 0.072(2) 0.0441(19) -0.0137(19) -0.0150(16) -0.001(2) 
C27 0.0400(15) 0.056(2) 0.0256(14) 0.0076(13) 0.0066(12) 0.0013(14) 
C28 0.0225(11) 0.0269(13) 0.0196(12) -0.0042(10) 0.0029(10) 0.0030(10) 
C29 0.0314(12) 0.0353(14) 0.0250(12) -0.0007(11) 0.0065(10) -0.0041(12) 
C30 0.0350(13) 0.0420(15) 0.0246(12) 0.0025(13) 0.0064(10) 0.0026(13) 
C31 0.0292(13) 0.0423(16) 0.0215(13) -0.0097(12) -0.0026(11) 0.0055(12) 
C32 0.0262(12) 0.0308(13) 0.0339(13) -0.0099(13) 0.0028(10) 0.0005(12) 
C33 0.0292(12) 0.0248(13) 0.0280(13) -0.0033(11) 0.0034(10) 0.0000(11) 
  
_geom_special_details 
; 
 All esds (except the esd in the dihedral angle between two l.s. planes) 
 are estimated using the full covariance matrix.  The cell esds are taken 
 into account individually in the estimation of esds in distances, angles 
 and torsion angles; correlations between esds in cell parameters are only 
 used when they are defined by crystal symmetry.  An approximate (isotropic) 
 treatment of cell esds is used for estimating esds involving l.s. planes. 
; 
  
loop_ 
 _geom_bond_atom_site_label_1 
 _geom_bond_atom_site_label_2 
 _geom_bond_distance 
 _geom_bond_site_symmetry_2 
 _geom_bond_publ_flag 
C1 C2 1.385(3) . ? 
C1 C14 1.493(3) . ? 
C1 S1 1.729(2) . ? 
C2 C3 1.431(3) . ? 
C2 C5 1.467(3) . ? 
C3 C4 1.355(3) . ? 
C4 C16 1.476(3) . ? 
C4 S1 1.733(2) . ? 
C5 C9 1.356(3) . ? 
C5 C6 1.508(3) . ? 
C6 F1 1.361(3) . ? 
C6 F2 1.363(3) . ? 
C6 C7 1.533(3) . ? 
C7 F3 1.345(3) . ? 
C7 F4 1.347(3) . ? 
C7 C8 1.535(3) . ? 
C8 F5 1.351(3) . ? 
C8 F6 1.370(3) . ? 
C8 C9 1.501(3) . ? 
C9 C11 1.466(3) . ? 
C10 C11 1.372(3) . ? 
C10 C15 1.490(3) . ? 
C10 S2 1.727(2) . ? 
C11 C12 1.436(3) . ? 
C12 C13 1.361(3) . ? 
C13 C28 1.476(3) . ? 
C13 S2 1.738(2) . ? 
C16 C21 1.388(3) . ? 
C16 C17 1.391(3) . ? 
C17 C18 1.376(3) . ? 
C18 C19 1.396(3) . ? 
C19 C20 1.386(3) . ? 
C19 C22 1.473(3) . ? 
C20 C21 1.389(3) . ? 
C22 C23 1.323(3) . ? 
C23 C24 1.507(3) . ? 
C24 C27 1.522(4) . ? 
C24 C25 1.530(4) . ? 
C25 C26 1.523(4) . ? 
C28 C33 1.393(3) . ? 
C28 C29 1.403(3) . ? 
C29 C30 1.385(3) . ? 
C30 C31 1.382(4) . ? 
C31 C32 1.385(4) . ? 
C32 C33 1.386(3) . ? 
  
loop_ 
 _geom_angle_atom_site_label_1 
 _geom_angle_atom_site_label_2 
 _geom_angle_atom_site_label_3 
 _geom_angle 
 _geom_angle_site_symmetry_1 
 _geom_angle_site_symmetry_3 
 _geom_angle_publ_flag 
C2 C1 C14 131.0(2) . . ? 
C2 C1 S1 109.88(17) . . ? 
C14 C1 S1 119.13(16) . . ? 
C1 C2 C3 112.4(2) . . ? 
C1 C2 C5 125.2(2) . . ? 
C3 C2 C5 122.5(2) . . ? 
C4 C3 C2 114.52(19) . . ? 
C3 C4 C16 128.1(2) . . ? 
C3 C4 S1 109.77(16) . . ? 
C16 C4 S1 122.17(16) . . ? 
C1 S1 C4 93.47(11) . . ? 
C9 C5 C2 130.4(2) . . ? 
C9 C5 C6 110.3(2) . . ? 
C2 C5 C6 119.2(2) . . ? 
F1 C6 F2 105.27(18) . . ? 
F1 C6 C5 113.97(18) . . ? 
F2 C6 C5 112.22(17) . . ? 
F1 C6 C7 110.00(17) . . ? 
F2 C6 C7 109.93(18) . . ? 
C5 C6 C7 105.49(19) . . ? 
F3 C7 F4 107.66(18) . . ? 
F3 C7 C6 109.92(19) . . ? 
F4 C7 C6 113.20(19) . . ? 
F3 C7 C8 109.43(19) . . ? 
F4 C7 C8 113.0(2) . . ? 
C6 C7 C8 103.54(18) . . ? 
F5 C8 F6 105.89(17) . . ? 
F5 C8 C9 114.3(2) . . ? 
F6 C8 C9 111.39(17) . . ? 
F5 C8 C7 111.47(18) . . ? 
F6 C8 C7 109.0(2) . . ? 
C9 C8 C7 104.81(18) . . ? 
C5 C9 C11 130.6(2) . . ? 
C5 C9 C8 110.44(19) . . ? 
C11 C9 C8 119.0(2) . . ? 
C11 C10 C15 129.6(2) . . ? 
C11 C10 S2 110.22(17) . . ? 
C15 C10 S2 120.13(18) . . ? 
C10 C11 C12 113.1(2) . . ? 
C10 C11 C9 124.0(2) . . ? 
C12 C11 C9 122.8(2) . . ? 
C13 C12 C11 113.3(2) . . ? 
C12 C13 C28 129.2(2) . . ? 
C12 C13 S2 110.21(16) . . ? 
C28 C13 S2 120.57(17) . . ? 
C10 S2 C13 93.08(12) . . ? 
C21 C16 C17 117.5(2) . . ? 
C21 C16 C4 122.9(2) . . ? 
C17 C16 C4 119.6(2) . . ? 
C18 C17 C16 121.2(2) . . ? 
C17 C18 C19 121.9(2) . . ? 
C20 C19 C18 116.6(2) . . ? 
C20 C19 C22 120.8(2) . . ? 
C18 C19 C22 122.6(2) . . ? 
C19 C20 C21 121.9(2) . . ? 
C16 C21 C20 120.9(2) . . ? 
C23 C22 C19 125.1(2) . . ? 
C22 C23 C24 129.4(2) . . ? 
C23 C24 C27 113.2(2) . . ? 
C23 C24 C25 108.6(2) . . ? 
C27 C24 C25 113.4(2) . . ? 
C26 C25 C24 114.6(3) . . ? 
C33 C28 C29 119.1(2) . . ? 
C33 C28 C13 121.3(2) . . ? 
C29 C28 C13 119.5(2) . . ? 
C30 C29 C28 119.9(2) . . ? 
C31 C30 C29 120.8(3) . . ? 
C30 C31 C32 119.3(2) . . ? 
C31 C32 C33 120.8(3) . . ? 
C32 C33 C28 120.1(2) . . ? 
  
loop_ 
 _geom_torsion_atom_site_label_1 
 _geom_torsion_atom_site_label_2 
 _geom_torsion_atom_site_label_3 
 _geom_torsion_atom_site_label_4 
 _geom_torsion 
 _geom_torsion_site_symmetry_1 
 _geom_torsion_site_symmetry_2 
 _geom_torsion_site_symmetry_3 
 _geom_torsion_site_symmetry_4 
 _geom_torsion_publ_flag 
C14 C1 C2 C3 179.3(2) . . . . ? 
S1 C1 C2 C3 -0.3(2) . . . . ? 
C14 C1 C2 C5 -1.2(4) . . . . ? 
S1 C1 C2 C5 179.16(18) . . . . ? 
C1 C2 C3 C4 -0.5(3) . . . . ? 
C5 C2 C3 C4 -180.0(2) . . . . ? 
C2 C3 C4 C16 -178.7(2) . . . . ? 
C2 C3 C4 S1 1.0(3) . . . . ? 
C2 C1 S1 C4 0.73(18) . . . . ? 
C14 C1 S1 C4 -178.92(18) . . . . ? 
C3 C4 S1 C1 -1.00(19) . . . . ? 
C16 C4 S1 C1 178.79(19) . . . . ? 
C1 C2 C5 C9 38.5(4) . . . . ? 
C3 C2 C5 C9 -142.1(2) . . . . ? 
C1 C2 C5 C6 -138.0(2) . . . . ? 
C3 C2 C5 C6 41.4(3) . . . . ? 
C9 C5 C6 F1 129.1(2) . . . . ? 
C2 C5 C6 F1 -53.7(3) . . . . ? 
C9 C5 C6 F2 -111.3(2) . . . . ? 
C2 C5 C6 F2 65.9(3) . . . . ? 
C9 C5 C6 C7 8.4(2) . . . . ? 
C2 C5 C6 C7 -174.44(19) . . . . ? 
F1 C6 C7 F3 -25.8(2) . . . . ? 
F2 C6 C7 F3 -141.31(18) . . . . ? 
C5 C6 C7 F3 97.5(2) . . . . ? 
F1 C6 C7 F4 94.6(2) . . . . ? 
F2 C6 C7 F4 -20.9(3) . . . . ? 
C5 C6 C7 F4 -142.08(18) . . . . ? 
F1 C6 C7 C8 -142.66(19) . . . . ? 
F2 C6 C7 C8 101.9(2) . . . . ? 
C5 C6 C7 C8 -19.3(2) . . . . ? 
F3 C7 C8 F5 30.0(3) . . . . ? 
F4 C7 C8 F5 -90.0(2) . . . . ? 
C6 C7 C8 F5 147.16(19) . . . . ? 
F3 C7 C8 F6 146.52(17) . . . . ? 
F4 C7 C8 F6 26.6(3) . . . . ? 
C6 C7 C8 F6 -96.3(2) . . . . ? 
F3 C7 C8 C9 -94.1(2) . . . . ? 
F4 C7 C8 C9 145.89(19) . . . . ? 
C6 C7 C8 C9 23.0(2) . . . . ? 
C2 C5 C9 C11 10.7(4) . . . . ? 
C6 C5 C9 C11 -172.5(2) . . . . ? 
C2 C5 C9 C8 -169.9(2) . . . . ? 
C6 C5 C9 C8 6.9(2) . . . . ? 
F5 C8 C9 C5 -141.58(19) . . . . ? 
F6 C8 C9 C5 98.5(2) . . . . ? 
C7 C8 C9 C5 -19.3(2) . . . . ? 
F5 C8 C9 C11 37.9(3) . . . . ? 
F6 C8 C9 C11 -82.1(2) . . . . ? 
C7 C8 C9 C11 160.20(19) . . . . ? 
C15 C10 C11 C12 -176.6(2) . . . . ? 
S2 C10 C11 C12 1.7(2) . . . . ? 
C15 C10 C11 C9 1.5(4) . . . . ? 
S2 C10 C11 C9 179.88(17) . . . . ? 
C5 C9 C11 C10 40.4(4) . . . . ? 
C8 C9 C11 C10 -138.9(2) . . . . ? 
C5 C9 C11 C12 -141.5(2) . . . . ? 
C8 C9 C11 C12 39.1(3) . . . . ? 
C10 C11 C12 C13 -1.9(3) . . . . ? 
C9 C11 C12 C13 179.9(2) . . . . ? 
C11 C12 C13 C28 -179.0(2) . . . . ? 
C11 C12 C13 S2 1.1(3) . . . . ? 
C11 C10 S2 C13 -0.90(18) . . . . ? 
C15 C10 S2 C13 177.6(2) . . . . ? 
C12 C13 S2 C10 -0.15(19) . . . . ? 
C28 C13 S2 C10 179.94(19) . . . . ? 
C3 C4 C16 C21 -176.2(2) . . . . ? 
S1 C4 C16 C21 4.0(3) . . . . ? 
C3 C4 C16 C17 3.0(4) . . . . ? 
S1 C4 C16 C17 -176.7(2) . . . . ? 
C21 C16 C17 C18 1.5(4) . . . . ? 
C4 C16 C17 C18 -177.7(2) . . . . ? 
C16 C17 C18 C19 0.1(4) . . . . ? 
C17 C18 C19 C20 -1.8(4) . . . . ? 
C17 C18 C19 C22 176.3(3) . . . . ? 
C18 C19 C20 C21 2.0(4) . . . . ? 
C22 C19 C20 C21 -176.1(2) . . . . ? 
C17 C16 C21 C20 -1.4(4) . . . . ? 
C4 C16 C21 C20 177.9(2) . . . . ? 
C19 C20 C21 C16 -0.4(4) . . . . ? 
C20 C19 C22 C23 172.4(3) . . . . ? 
C18 C19 C22 C23 -5.6(4) . . . . ? 
C19 C22 C23 C24 -176.3(2) . . . . ? 
C22 C23 C24 C27 4.2(4) . . . . ? 
C22 C23 C24 C25 131.1(3) . . . . ? 
C23 C24 C25 C26 169.9(2) . . . . ? 
C27 C24 C25 C26 -63.3(3) . . . . ? 
C12 C13 C28 C33 154.0(3) . . . . ? 
S2 C13 C28 C33 -26.1(3) . . . . ? 
C12 C13 C28 C29 -26.3(4) . . . . ? 
S2 C13 C28 C29 153.6(2) . . . . ? 
C33 C28 C29 C30 -1.0(4) . . . . ? 
C13 C28 C29 C30 179.3(2) . . . . ? 
C28 C29 C30 C31 0.8(4) . . . . ? 
C29 C30 C31 C32 -0.2(4) . . . . ? 
C30 C31 C32 C33 -0.2(4) . . . . ? 
C31 C32 C33 C28 0.0(4) . . . . ? 
C29 C28 C33 C32 0.6(4) . . . . ? 
C13 C28 C33 C32 -179.7(2) . . . . ? 
  
_diffrn_measured_fraction_theta_max    0.936 
_diffrn_reflns_theta_full              27.52 
_diffrn_measured_fraction_theta_full   0.936 
_refine_diff_density_max    0.299 
_refine_diff_density_min   -0.210 
_refine_diff_density_rms    0.055 
  
#===END  
  
data_(S,R,R)-1b 
  
_audit_creation_method            SHELXL-97 
_chemical_name_systematic 
; 
(S,R,R)-1b
; 
_publ_requested_journal
'Organic Letters '
_publ_section_title 
' '
_publ_section_abstract
' '

_publ_contact_author
;Prof. Masahiro. Irie
Department of Chemistry and Biochemistry
Graduate School of Engineering, Kyushu University
Hakozaki 6-10-1, Higashi-ku, Fukuoka, Japan
;
_publ_contact_author_phone            ' 81(92)6423556 '
_publ_contact_author_fax              ' 81(92)6423568 '
_publ_contact_author_email            ' irie@cstf.kyushu-u.ac.jp'

loop_
_publ_author_name
_publ_author_address
'Mr. Satoshi Yamamoto'
;Department of Chemistry and Biochemistry
Graduate School of Engineering, Kyushu University
Hakozaki 6-10-1, Higashi-ku, Fukuoka, Japan
;
'Dr. Kenji Matsuda'
;Department of Chemistry and Biochemistry
Graduate School of Engineering, Kyushu University
Hakozaki 6-10-1, Higashi-ku, Fukuoka, Japan
;
'Prof. Masahiro. Irie'
;Department of Chemistry and Biochemistry
Graduate School of Engineering, Kyushu University
Hakozaki 6-10-1, Higashi-ku, Fukuoka, Japan
;
_chemical_name_common             ? 
_chemical_melting_point           ? 
_chemical_formula_moiety          ? 
_chemical_formula_sum 
 'C33 H28 F6 S2' 
_chemical_formula_weight          602.67 
  
loop_ 
 _atom_type_symbol 
 _atom_type_description 
 _atom_type_scat_dispersion_real 
 _atom_type_scat_dispersion_imag 
 _atom_type_scat_source 
 'C'  'C'   0.0033   0.0016 
 'International Tables Vol C Tables 4.2.6.8 and 6.1.1.4' 
 'H'  'H'   0.0000   0.0000 
 'International Tables Vol C Tables 4.2.6.8 and 6.1.1.4' 
 'F'  'F'   0.0171   0.0103 
 'International Tables Vol C Tables 4.2.6.8 and 6.1.1.4' 
 'S'  'S'   0.1246   0.1234 
 'International Tables Vol C Tables 4.2.6.8 and 6.1.1.4' 
  
_symmetry_cell_setting            Monoclinic 
_symmetry_space_group_name_H-M    P2(1) 
  
loop_ 
 _symmetry_equiv_pos_as_xyz 
 'x, y, z' 
 '-x, y+1/2, -z' 
  
_cell_length_a                    10.555(6) 
_cell_length_b                    25.402(13) 
_cell_length_c                    10.647(6) 
_cell_angle_alpha                 90.00 
_cell_angle_beta                  91.697(6) 
_cell_angle_gamma                 90.00 
_cell_volume                      2853(3) 
_cell_formula_units_Z             4 
_cell_measurement_temperature     173(2) 
_cell_measurement_reflns_used     ? 
_cell_measurement_theta_min       1.60 
_cell_measurement_theta_max       27.63 
  
_exptl_crystal_description        plate 
_exptl_crystal_colour             black 
_exptl_crystal_size_max           0.2 
_exptl_crystal_size_mid           0.15 
_exptl_crystal_size_min           0.05 
_exptl_crystal_density_meas       ? 
_exptl_crystal_density_diffrn     1.403 
_exptl_crystal_density_method     'not measured' 
_exptl_crystal_F_000              1248 
_exptl_absorpt_coefficient_mu     0.248 
_exptl_absorpt_correction_type    none 
_exptl_absorpt_correction_T_min   ? 
_exptl_absorpt_correction_T_max   ?
_exptl_absorpt_process_details    ? 
  
_exptl_special_details 
; 
 ? 
; 
  
_diffrn_ambient_temperature       173(2) 
_diffrn_radiation_wavelength      0.71073 
_diffrn_radiation_type            MoK\a 
_diffrn_radiation_source          'sealed tube'
_diffrn_radiation_monochromator   graphite 
_diffrn_measurement_device_type   'CCD area detector' 
_diffrn_measurement_method        'omega scans'
_diffrn_detector_area_resol_mean  ? 
_diffrn_standards_number          ? 
_diffrn_standards_interval_count  ? 
_diffrn_standards_interval_time   ? 
_diffrn_standards_decay_%         -1.36 
_diffrn_reflns_number             16375 
_diffrn_reflns_av_R_equivalents   0.1028 
_diffrn_reflns_av_sigmaI/netI     0.2045 
_diffrn_reflns_limit_h_min        -13 
_diffrn_reflns_limit_h_max        7 
_diffrn_reflns_limit_k_min        -32 
_diffrn_reflns_limit_k_max        32 
_diffrn_reflns_limit_l_min        -13 
_diffrn_reflns_limit_l_max        13 
_diffrn_reflns_theta_min          1.60 
_diffrn_reflns_theta_max          27.63 
_reflns_number_total              11163 
_reflns_number_gt                 5422 
_reflns_threshold_expression      >2sigma(I) 
  
_computing_data_collection        'Bruker SMART' 
_computing_cell_refinement        'Bruker SMART' 
_computing_data_reduction         'Bruker SHELXTL' 
_computing_structure_solution     'SHELXS-97 (Sheldrick, 1990)' 
_computing_structure_refinement   'SHELXL-97 (Sheldrick, 1997)' 
_computing_molecular_graphics     'Bruker SHELXTL' 
_computing_publication_material   'Bruker SHELXTL' 
  
_refine_special_details 
; 
 Refinement of F^2^ against ALL reflections.  The weighted R-factor wR and 
 goodness of fit S are based on F^2^, conventional R-factors R are based 
 on F, with F set to zero for negative F^2^. The threshold expression of 
 F^2^ > 2sigma(F^2^) is used only for calculating R-factors(gt) etc. and is 
 not relevant to the choice of reflections for refinement.  R-factors based 
 on F^2^ are statistically about twice as large as those based on F, and R- 
 factors based on ALL data will be even larger. 
; 
  
_refine_ls_structure_factor_coef  Fsqd 
_refine_ls_matrix_type            full 
_refine_ls_weighting_scheme       calc 
_refine_ls_weighting_details 
 'calc w=1/[\s^2^(Fo^2^)+(0.1600P)^2^+0.0000P] where P=(Fo^2^+2Fc^2^)/3' 
_atom_sites_solution_primary      direct 
_atom_sites_solution_secondary    difmap 
_atom_sites_solution_hydrogens    geom 
_refine_ls_hydrogen_treatment     mixed 
_refine_ls_extinction_method      none 
_refine_ls_extinction_coef        ? 
_refine_ls_abs_structure_details 
 'Flack H D (1983), Acta Cryst. A39, 876-881' 
_refine_ls_abs_structure_Flack    0.09(16) 
_refine_ls_number_reflns          11163 
_refine_ls_number_parameters      742 
_refine_ls_number_restraints      1 
_refine_ls_R_factor_all           0.2019 
_refine_ls_R_factor_gt            0.0931 
_refine_ls_wR_factor_ref          0.2971 
_refine_ls_wR_factor_gt           0.2286 
_refine_ls_goodness_of_fit_ref    1.015 
_refine_ls_restrained_S_all       1.015 
_refine_ls_shift/su_max           1.553 
_refine_ls_shift/su_mean          0.016 
  
loop_ 
 _atom_site_label 
 _atom_site_type_symbol 
 _atom_site_fract_x 
 _atom_site_fract_y 
 _atom_site_fract_z 
 _atom_site_U_iso_or_equiv 
 _atom_site_adp_type 
 _atom_site_occupancy 
 _atom_site_symmetry_multiplicity 
 _atom_site_calc_flag 
 _atom_site_refinement_flags 
 _atom_site_disorder_assembly 
 _atom_site_disorder_group 
F7A F 0.5244(10) 0.4271(4) 0.0820(11) 0.046(3) Uiso 0.590(11) 1 d P A 1 
F8A F 0.5267(10) 0.3863(4) -0.0968(9) 0.044(3) Uiso 0.590(11) 1 d P A 1 
F9A F 0.4092(12) 0.4943(5) -0.0497(13) 0.055(4) Uiso 0.590(11) 1 d P A 1 
F10A F 0.3217(10) 0.4341(4) -0.1808(9) 0.051(3) Uiso 0.590(11) 1 d P A 1 
F11A F 0.1322(11) 0.4511(5) -0.0382(14) 0.058(3) Uiso 0.590(11) 1 d P A 1 
F12A F 0.2515(11) 0.4778(4) 0.1132(10) 0.047(3) Uiso 0.590(11) 1 d P A 1 
F7B F 0.5509(19) 0.4088(7) 0.0315(19) 0.063(5) Uiso 0.410(11) 1 d P A 2 
F8B F 0.4526(19) 0.3929(8) -0.1452(19) 0.074(6) Uiso 0.410(11) 1 d P A 2 
F9B F 0.377(2) 0.4893(9) -0.100(2) 0.076(7) Uiso 0.410(11) 1 d P A 2 
F10B F 0.386(2) 0.4733(9) 0.098(2) 0.097(8) Uiso 0.410(11) 1 d P A 2 
F11B F 0.1632(19) 0.4742(7) 0.0781(18) 0.072(6) Uiso 0.410(11) 1 d P A 2 
F12B F 0.1489(17) 0.4403(8) -0.103(2) 0.067(5) Uiso 0.410(11) 1 d P A 2 
C1 C 0.2556(9) 0.6418(4) 0.4057(8) 0.032(2) Uani 1 1 d . . . 
C2 C 0.3673(10) 0.6070(4) 0.4432(9) 0.036(2) Uani 1 1 d . . . 
C3 C 0.4826(9) 0.6353(4) 0.4495(9) 0.033(2) Uani 1 1 d . . . 
H3 H 0.5578 0.6211 0.4872 0.039 Uiso 1 1 calc R . . 
C4 C 0.4785(9) 0.6835(4) 0.3988(9) 0.032(2) Uani 1 1 d . . . 
C5 C 0.3383(10) 0.5547(4) 0.4664(10) 0.038(2) Uani 1 1 d . . . 
C6 C 0.4233(10) 0.5147(4) 0.5162(9) 0.037(2) Uani 1 1 d . . . 
C7 C 0.3480(10) 0.4629(5) 0.4878(11) 0.048(3) Uani 1 1 d . . . 
C8 C 0.2125(11) 0.4780(4) 0.4857(10) 0.044(3) Uani 1 1 d . . . 
C9 C 0.2149(10) 0.5331(4) 0.4378(9) 0.038(2) Uani 1 1 d . . . 
C10 C 0.1694(10) 0.6110(3) 0.3149(9) 0.034(2) Uani 1 1 d . . . 
C11 C 0.1243(9) 0.5610(4) 0.3749(8) 0.030(2) Uani 1 1 d . . . 
C12 C -0.0037(9) 0.5499(4) 0.3403(9) 0.035(2) Uani 1 1 d . . . 
H12 H -0.0412 0.5166 0.3563 0.043 Uiso 1 1 calc R . . 
C13 C -0.0682(9) 0.5889(4) 0.2840(9) 0.037(2) Uani 1 1 d . . . 
C14 C 0.1904(10) 0.6593(4) 0.5241(9) 0.038(2) Uani 1 1 d . . . 
H14A H 0.1530 0.6286 0.5649 0.057 Uiso 1 1 calc R . . 
H14B H 0.1234 0.6847 0.5020 0.057 Uiso 1 1 calc R . . 
H14C H 0.2525 0.6758 0.5818 0.057 Uiso 1 1 calc R . . 
C15 C 0.2339(10) 0.5975(3) 0.1888(8) 0.033(2) Uani 1 1 d . . . 
H15A H 0.3069 0.5744 0.2057 0.050 Uiso 1 1 calc R . . 
H15B H 0.2624 0.6300 0.1491 0.050 Uiso 1 1 calc R . . 
H15C H 0.1729 0.5795 0.1324 0.050 Uiso 1 1 calc R . . 
C16 C 0.5825(10) 0.7215(5) 0.3873(9) 0.043(3) Uani 1 1 d . . . 
C17 C 0.7016(12) 0.7091(4) 0.4266(11) 0.055(3) Uani 1 1 d . . . 
H17 H 0.7184 0.6765 0.4672 0.067 Uiso 1 1 calc R . . 
C18 C 0.8053(12) 0.7466(5) 0.4063(12) 0.061(4) Uani 1 1 d . . . 
H18 H 0.8898 0.7377 0.4313 0.074 Uiso 1 1 calc R . . 
C19 C 0.7794(15) 0.7941(5) 0.3513(11) 0.060(4) Uani 1 1 d . . . 
C20 C 0.6621(14) 0.8037(6) 0.3181(12) 0.065(4) Uani 1 1 d . . . 
H20 H 0.6434 0.8366 0.2794 0.078 Uiso 1 1 calc R . . 
C21 C 0.5643(12) 0.7696(4) 0.3352(10) 0.048(3) Uani 1 1 d . . . 
H21 H 0.4809 0.7799 0.3098 0.058 Uiso 1 1 calc R . . 
C22 C -0.1993(9) 0.5885(4) 0.2385(9) 0.034(2) Uani 1 1 d . . . 
C23 C -0.2772(10) 0.5447(4) 0.2528(11) 0.048(3) Uani 1 1 d . . . 
H23 H -0.2487 0.5157 0.3021 0.058 Uiso 1 1 calc R . . 
C24 C -0.3950(10) 0.5438(5) 0.1954(10) 0.048(3) Uani 1 1 d . . . 
H24 H -0.4467 0.5136 0.2056 0.058 Uiso 1 1 calc R . . 
C25 C -0.4412(10) 0.5848(5) 0.1241(10) 0.050(3) Uani 1 1 d . . . 
H25 H -0.5231 0.5834 0.0847 0.059 Uiso 1 1 calc R . . 
C26 C -0.3641(11) 0.6284(4) 0.1116(12) 0.054(3) Uani 1 1 d . . . 
H26 H -0.3929 0.6571 0.0613 0.065 Uiso 1 1 calc R . . 
C27 C -0.2483(11) 0.6310(4) 0.1694(11) 0.048(3) Uani 1 1 d . . . 
H27 H -0.1995 0.6622 0.1629 0.058 Uiso 1 1 calc R . . 
C28 C 0.8811(16) 0.8289(8) 0.3256(16) 0.122(9) Uani 1 1 d . . . 
H28 H 0.8518 0.8598 0.2840 0.146 Uiso 1 1 calc R . . 
C29 C 0.9923(15) 0.8296(8) 0.3424(15) 0.101(6) Uani 1 1 d . . . 
H29 H 1.0289 0.7982 0.3758 0.121 Uiso 1 1 calc R . . 
C30 C 1.0945(14) 0.8790(8) 0.3148(15) 0.093(6) Uani 1 1 d . . . 
H30 H 1.0523 0.9046 0.2557 0.112 Uiso 1 1 calc R . . 
C31 C 1.1403(18) 0.9067(6) 0.4211(19) 0.106(6) Uani 1 1 d . . . 
H31A H 1.1601 0.8818 0.4891 0.159 Uiso 1 1 calc R . . 
H31B H 1.0756 0.9315 0.4482 0.159 Uiso 1 1 calc R . . 
H31C H 1.2171 0.9260 0.4000 0.159 Uiso 1 1 calc R . . 
C34 C 0.2755(10) 0.2768(4) 0.1054(8) 0.037(2) Uani 1 1 d . . . 
C35 C 0.3876(11) 0.3114(4) 0.0688(8) 0.039(3) Uani 1 1 d . . . 
C36 C 0.5002(11) 0.2833(3) 0.0619(10) 0.041(3) Uani 1 1 d . . . 
H36 H 0.5735 0.2974 0.0245 0.049 Uiso 1 1 calc R . . 
C37 C 0.4982(11) 0.2339(4) 0.1125(10) 0.047(3) Uani 1 1 d . . . 
C38 C 0.3596(11) 0.3617(4) 0.0418(9) 0.040(3) Uani 1 1 d . A . 
C39 C 0.4453(12) 0.4041(4) -0.0105(11) 0.050(3) Uani 1 1 d . . . 
C40 C 0.3540(13) 0.4473(4) -0.0410(15) 0.074(4) Uani 1 1 d . A . 
C41 C 0.2341(12) 0.4390(4) 0.0138(10) 0.047(3) Uani 1 1 d . . . 
C42 C 0.2384(10) 0.3842(4) 0.0643(9) 0.037(2) Uani 1 1 d . A . 
C43 C 0.1967(11) 0.3076(4) 0.1962(10) 0.044(3) Uani 1 1 d . A . 
C44 C 0.1515(12) 0.3604(4) 0.1351(10) 0.049(3) Uani 1 1 d . . . 
C45 C 0.0267(11) 0.3728(4) 0.1656(9) 0.043(3) Uani 1 1 d . A . 
H45 H -0.0101 0.4062 0.1477 0.051 Uiso 1 1 calc R . . 
C46 C -0.0372(10) 0.3340(4) 0.2220(10) 0.041(3) Uani 1 1 d . . . 
C47 C 0.2005(11) 0.2604(4) -0.0093(10) 0.047(3) Uani 1 1 d . . . 
H47A H 0.1451 0.2309 0.0116 0.070 Uiso 1 1 calc R . . 
H47B H 0.2583 0.2495 -0.0747 0.070 Uiso 1 1 calc R . . 
H47C H 0.1488 0.2901 -0.0398 0.070 Uiso 1 1 calc R . . 
C48 C 0.2644(11) 0.3232(4) 0.3165(9) 0.044(3) Uani 1 1 d . . . 
H48A H 0.2924 0.2915 0.3619 0.066 Uiso 1 1 calc R A . 
H48B H 0.2068 0.3434 0.3686 0.066 Uiso 1 1 calc R . . 
H48C H 0.3382 0.3448 0.2975 0.066 Uiso 1 1 calc R . . 
C49 C 0.5999(9) 0.1962(4) 0.1216(8) 0.033(2) Uani 1 1 d . . . 
C50 C 0.7219(11) 0.2077(4) 0.0859(11) 0.049(3) Uani 1 1 d . . . 
H50 H 0.7381 0.2416 0.0519 0.058 Uiso 1 1 calc R . . 
C51 C 0.8234(11) 0.1717(4) 0.0975(11) 0.046(3) Uani 1 1 d . . . 
H51 H 0.9062 0.1814 0.0739 0.056 Uiso 1 1 calc R . . 
C52 C 0.7996(11) 0.1214(4) 0.1446(10) 0.044(3) Uani 1 1 d . . . 
C53 C 0.6736(9) 0.1106(4) 0.1789(9) 0.036(2) Uani 1 1 d . . . 
H53 H 0.6546 0.0765 0.2101 0.043 Uiso 1 1 calc R . . 
C54 C 0.5807(9) 0.1457(4) 0.1694(9) 0.033(2) Uani 1 1 d . . . 
H54 H 0.4987 0.1363 0.1961 0.040 Uiso 1 1 calc R . . 
C55 C -0.1644(11) 0.3358(4) 0.2731(9) 0.042(3) Uani 1 1 d . A . 
C56 C -0.2350(13) 0.3818(5) 0.2613(14) 0.074(4) Uani 1 1 d . . . 
H56 H -0.2030 0.4106 0.2149 0.089 Uiso 1 1 calc R A . 
C57 C -0.3505(13) 0.3859(6) 0.3161(16) 0.090(6) Uani 1 1 d . A . 
H57 H -0.3984 0.4174 0.3066 0.108 Uiso 1 1 calc R . . 
C58 C -0.3964(12) 0.3460(5) 0.3830(13) 0.064(4) Uani 1 1 d . . . 
H58 H -0.4735 0.3503 0.4257 0.077 Uiso 1 1 calc R A . 
C59 C -0.3341(12) 0.3000(5) 0.3900(13) 0.067(4) Uani 1 1 d . A . 
H59 H -0.3703 0.2709 0.4322 0.081 Uiso 1 1 calc R . . 
C60 C -0.2154(10) 0.2948(4) 0.3348(10) 0.043(3) Uani 1 1 d . . . 
H60 H -0.1709 0.2623 0.3409 0.051 Uiso 1 1 calc R A . 
C61 C 0.8953(11) 0.0815(4) 0.1659(9) 0.038(2) Uani 1 1 d . . . 
H61 H 0.8694 0.0504 0.2073 0.046 Uiso 1 1 calc R . . 
C62 C 1.0109(12) 0.0838(5) 0.1350(11) 0.051(3) Uani 1 1 d . . . 
H62 H 1.0384 0.1146 0.0933 0.062 Uiso 1 1 calc R . . 
C63 C 1.1116(12) 0.0388(6) 0.1612(13) 0.068(4) Uani 1 1 d . . . 
H63 H 1.0681 0.0100 0.2071 0.082 Uiso 1 1 calc R . . 
C64 C 1.2116(16) 0.0593(8) 0.2445(17) 0.094(5) Uani 1 1 d . . . 
H64A H 1.2730 0.0305 0.2615 0.113 Uiso 1 1 calc R . . 
H64B H 1.2568 0.0871 0.1986 0.113 Uiso 1 1 calc R . . 
C65 C 1.178(2) 0.0797(12) 0.357(3) 0.234(19) Uani 1 1 d . . . 
H65A H 1.0857 0.0775 0.3648 0.352 Uiso 1 1 calc R . . 
H65B H 1.2046 0.1166 0.3629 0.352 Uiso 1 1 calc R . . 
H65C H 1.2193 0.0596 0.4257 0.352 Uiso 1 1 calc R . . 
C66 C 1.1610(14) 0.0155(8) 0.0425(14) 0.098(6) Uani 1 1 d . . . 
H66A H 1.1883 0.0438 -0.0130 0.147 Uiso 1 1 calc R . . 
H66B H 1.0938 -0.0050 0.0000 0.147 Uiso 1 1 calc R . . 
H66C H 1.2331 -0.0075 0.0631 0.147 Uiso 1 1 calc R . . 
C33 C 1.160(2) 0.8195(11) 0.142(2) 0.157(11) Uani 1 1 d . . . 
H33A H 1.0936 0.7933 0.1575 0.236 Uiso 1 1 calc R . . 
H33B H 1.2360 0.8016 0.1138 0.236 Uiso 1 1 calc R . . 
H33C H 1.1293 0.8440 0.0764 0.236 Uiso 1 1 calc R . . 
C32 C 1.185(3) 0.8442(10) 0.240(3) 0.156(10) Uani 1 1 d . . . 
H32A H 1.2573 0.8671 0.2201 0.187 Uiso 1 1 calc R . . 
H32B H 1.2180 0.8176 0.3003 0.187 Uiso 1 1 calc R . . 
F1 F 0.5393(6) 0.5116(2) 0.4707(6) 0.0539(17) Uani 1 1 d . . . 
F2 F 0.4444(6) 0.5171(3) 0.6440(6) 0.0583(18) Uani 1 1 d . . . 
F3 F 0.3755(6) 0.4463(2) 0.3713(6) 0.0563(17) Uani 1 1 d . . . 
F4 F 0.3779(6) 0.4229(2) 0.5653(6) 0.0590(18) Uani 1 1 d . . . 
F5 F 0.1402(6) 0.4465(2) 0.4139(7) 0.0586(18) Uani 1 1 d . . . 
F6 F 0.1679(6) 0.4751(2) 0.6043(6) 0.0568(18) Uani 1 1 d . . . 
S1 S 0.3292(3) 0.69961(9) 0.3365(2) 0.0391(7) Uani 1 1 d . . . 
S2 S 0.0213(2) 0.64720(9) 0.2739(2) 0.0380(6) Uani 1 1 d . . . 
S3 S 0.3519(3) 0.21960(9) 0.1793(3) 0.0422(7) Uani 1 1 d . . . 
S4 S 0.0486(3) 0.27555(9) 0.2378(3) 0.0427(7) Uani 1 1 d . A . 
  
loop_ 
 _atom_site_aniso_label 
 _atom_site_aniso_U_11 
 _atom_site_aniso_U_22 
 _atom_site_aniso_U_33 
 _atom_site_aniso_U_23 
 _atom_site_aniso_U_13 
 _atom_site_aniso_U_12 
C1 0.040(6) 0.025(5) 0.030(5) -0.002(4) -0.004(4) -0.005(4) 
C2 0.048(7) 0.032(5) 0.027(5) -0.006(4) -0.002(4) 0.011(5) 
C3 0.027(5) 0.031(5) 0.040(6) -0.002(4) -0.008(4) 0.002(4) 
C4 0.034(6) 0.027(5) 0.034(5) -0.016(4) 0.002(4) -0.006(4) 
C5 0.044(6) 0.029(5) 0.041(6) 0.002(4) -0.003(5) 0.005(5) 
C6 0.045(7) 0.038(6) 0.028(6) 0.016(4) 0.014(5) 0.005(5) 
C7 0.043(7) 0.052(7) 0.049(7) 0.019(6) 0.006(5) 0.013(5) 
C8 0.058(8) 0.030(5) 0.043(7) -0.002(5) 0.004(6) 0.008(5) 
C9 0.051(7) 0.025(5) 0.037(6) 0.007(4) 0.000(5) -0.005(5) 
C10 0.046(6) 0.017(4) 0.039(6) 0.007(4) 0.000(5) -0.003(4) 
C11 0.041(6) 0.028(5) 0.021(5) -0.005(4) 0.001(4) 0.003(4) 
C12 0.038(6) 0.020(5) 0.048(6) 0.001(4) -0.005(5) -0.019(4) 
C13 0.040(6) 0.033(6) 0.040(6) 0.013(5) 0.009(5) -0.012(5) 
C14 0.051(7) 0.036(6) 0.028(5) 0.000(4) 0.004(5) 0.001(5) 
C15 0.060(7) 0.021(5) 0.019(5) 0.009(4) -0.001(4) 0.001(4) 
C16 0.040(7) 0.054(7) 0.036(6) -0.027(5) 0.003(5) -0.011(6) 
C17 0.070(9) 0.034(7) 0.062(8) -0.016(5) 0.000(7) -0.011(6) 
C18 0.062(8) 0.060(9) 0.062(8) -0.035(7) -0.005(6) -0.002(7) 
C19 0.089(11) 0.053(8) 0.039(7) -0.023(6) 0.023(7) -0.019(7) 
C20 0.072(10) 0.062(9) 0.063(9) -0.025(7) 0.019(7) -0.025(8) 
C21 0.066(8) 0.027(6) 0.053(7) -0.003(5) 0.020(6) -0.010(5) 
C22 0.037(6) 0.022(5) 0.042(6) -0.003(4) 0.002(4) 0.000(4) 
C23 0.042(7) 0.042(6) 0.061(7) 0.006(5) 0.005(5) -0.032(5) 
C24 0.044(7) 0.052(7) 0.048(7) 0.005(6) 0.007(5) -0.024(6) 
C25 0.034(6) 0.069(8) 0.044(7) 0.002(6) -0.007(5) -0.008(6) 
C26 0.058(8) 0.036(6) 0.068(8) 0.021(6) -0.012(6) -0.008(6) 
C27 0.047(7) 0.039(6) 0.059(7) -0.002(5) -0.002(6) -0.010(5) 
C28 0.084(12) 0.183(19) 0.102(13) -0.115(14) 0.066(10) -0.085(13) 
C29 0.067(11) 0.138(15) 0.098(12) 0.059(12) 0.006(9) -0.044(11) 
C30 0.057(9) 0.143(16) 0.081(11) 0.019(11) 0.033(8) 0.037(10) 
C31 0.134(16) 0.039(8) 0.144(17) -0.001(9) -0.032(13) -0.008(9) 
C34 0.062(7) 0.026(5) 0.024(5) 0.001(4) 0.006(5) 0.007(5) 
C35 0.068(8) 0.026(5) 0.022(5) 0.004(4) 0.011(5) 0.008(5) 
C36 0.059(7) 0.015(5) 0.049(6) 0.002(4) 0.014(5) -0.010(5) 
C37 0.056(7) 0.038(6) 0.048(7) 0.003(5) 0.008(6) 0.011(5) 
C38 0.062(7) 0.025(5) 0.033(6) 0.002(4) 0.015(5) -0.005(5) 
C39 0.058(8) 0.037(6) 0.056(7) 0.023(5) 0.020(6) 0.007(5) 
C40 0.082(10) 0.027(6) 0.112(12) 0.036(7) -0.011(9) -0.004(6) 
C41 0.086(9) 0.025(5) 0.030(6) 0.000(4) 0.024(6) -0.004(6) 
C42 0.056(7) 0.021(5) 0.035(6) 0.006(4) 0.015(5) 0.000(5) 
C43 0.059(7) 0.021(5) 0.053(7) -0.005(5) 0.019(6) 0.010(5) 
C44 0.091(9) 0.015(5) 0.042(6) 0.009(4) 0.022(6) 0.022(5) 
C45 0.076(8) 0.015(5) 0.038(6) 0.005(4) 0.019(6) 0.009(5) 
C46 0.054(7) 0.027(5) 0.043(6) 0.009(5) 0.004(5) 0.018(5) 
C47 0.064(8) 0.026(5) 0.050(7) -0.009(5) 0.005(6) 0.009(5) 
C48 0.068(8) 0.026(5) 0.039(6) 0.006(5) 0.014(5) 0.002(5) 
C49 0.038(6) 0.031(5) 0.029(5) 0.007(4) 0.006(4) -0.004(4) 
C50 0.052(7) 0.035(6) 0.060(7) 0.003(5) 0.012(6) -0.010(5) 
C51 0.041(7) 0.048(7) 0.050(7) -0.001(5) 0.000(5) 0.001(6) 
C52 0.049(7) 0.053(7) 0.029(6) -0.008(5) -0.005(5) 0.006(5) 
C53 0.039(6) 0.037(6) 0.031(6) -0.002(4) -0.003(5) 0.006(5) 
C54 0.037(6) 0.024(5) 0.039(5) 0.012(4) 0.010(4) 0.004(5) 
C55 0.063(8) 0.034(6) 0.029(6) 0.006(4) 0.005(5) 0.018(5) 
C56 0.078(10) 0.044(7) 0.102(11) 0.029(7) 0.031(8) 0.027(7) 
C57 0.069(10) 0.065(9) 0.139(14) 0.063(10) 0.048(9) 0.044(8) 
C58 0.040(7) 0.066(9) 0.085(10) 0.002(7) -0.005(6) 0.024(6) 
C59 0.055(8) 0.064(8) 0.084(10) 0.004(7) 0.030(7) -0.018(7) 
C60 0.052(7) 0.029(5) 0.048(7) -0.004(5) 0.015(5) 0.006(5) 
C61 0.048(7) 0.027(5) 0.040(6) 0.000(4) -0.005(5) 0.012(5) 
C62 0.050(8) 0.047(7) 0.057(7) 0.024(6) 0.002(6) 0.009(6) 
C63 0.052(8) 0.073(9) 0.079(10) 0.022(8) 0.008(7) -0.015(7) 
C64 0.082(11) 0.111(14) 0.090(12) -0.016(10) -0.006(9) -0.010(10) 
C65 0.16(2) 0.27(3) 0.27(3) -0.19(3) -0.17(2) 0.08(2) 
C66 0.062(10) 0.178(18) 0.055(9) 0.019(10) 0.014(7) 0.033(10) 
C33 0.136(19) 0.22(3) 0.119(18) -0.089(19) 0.085(15) -0.043(18) 
C32 0.16(2) 0.13(2) 0.18(3) 0.002(18) 0.01(2) 0.056(17) 
F1 0.054(4) 0.049(4) 0.060(4) 0.021(3) 0.015(3) 0.017(3) 
F2 0.066(4) 0.067(4) 0.041(4) 0.005(3) -0.001(3) 0.019(3) 
F3 0.072(4) 0.038(4) 0.059(4) -0.013(3) 0.018(3) 0.015(3) 
F4 0.081(5) 0.020(3) 0.076(5) 0.024(3) -0.003(4) 0.017(3) 
F5 0.077(5) 0.018(3) 0.080(5) 0.010(3) 0.004(4) -0.008(3) 
F6 0.078(5) 0.040(4) 0.054(4) 0.024(3) 0.024(3) 0.007(3) 
S1 0.0473(17) 0.0223(12) 0.0473(16) 0.0053(11) -0.0054(12) -0.0028(11) 
S2 0.0434(16) 0.0233(12) 0.0468(15) 0.0085(11) -0.0059(11) -0.0019(11) 
S3 0.0535(18) 0.0204(12) 0.0536(17) 0.0082(12) 0.0156(13) 0.0055(11) 
S4 0.0582(18) 0.0193(12) 0.0514(17) 0.0066(11) 0.0146(14) 0.0078(12) 
  
_geom_special_details 
; 
 All esds (except the esd in the dihedral angle between two l.s. planes) 
 are estimated using the full covariance matrix.  The cell esds are taken 
 into account individually in the estimation of esds in distances, angles 
 and torsion angles; correlations between esds in cell parameters are only 
 used when they are defined by crystal symmetry.  An approximate (isotropic) 
 treatment of cell esds is used for estimating esds involving l.s. planes. 
; 
  
loop_ 
 _geom_bond_atom_site_label_1 
 _geom_bond_atom_site_label_2 
 _geom_bond_distance 
 _geom_bond_site_symmetry_2 
 _geom_bond_publ_flag 
F7A C39 1.400(17) . ? 
F8A C39 1.353(15) . ? 
F9A C40 1.332(17) . ? 
F10A C40 1.555(18) . ? 
F11A C41 1.234(15) . ? 
F12A C41 1.454(14) . ? 
F7B C39 1.195(19) . ? 
F8B C39 1.47(2) . ? 
F9B C40 1.27(2) . ? 
F10B C40 1.65(3) . ? 
F11B C41 1.36(2) . ? 
F12B C41 1.51(2) . ? 
C1 C2 1.518(13) . ? 
C1 C10 1.525(13) . ? 
C1 C14 1.520(13) . ? 
C1 S1 1.827(10) . ? 
C2 C5 1.386(14) . ? 
C2 C3 1.414(14) . ? 
C3 C4 1.338(14) . ? 
C4 C16 1.469(14) . ? 
C4 S1 1.741(10) . ? 
C5 C9 1.438(14) . ? 
C5 C6 1.446(14) . ? 
C6 F1 1.332(11) . ? 
C6 F2 1.374(11) . ? 
C6 C7 1.561(16) . ? 
C7 F4 1.341(12) . ? 
C7 F3 1.351(13) . ? 
C7 C8 1.480(15) . ? 
C8 F5 1.332(12) . ? 
C8 F6 1.363(12) . ? 
C8 C9 1.490(14) . ? 
C9 C11 1.352(13) . ? 
C10 C11 1.504(13) . ? 
C10 C15 1.561(13) . ? 
C10 S2 1.854(10) . ? 
C11 C12 1.418(13) . ? 
C12 C13 1.335(14) . ? 
C13 C22 1.453(14) . ? 
C13 S2 1.763(9) . ? 
C16 C17 1.351(16) . ? 
C16 C21 1.353(16) . ? 
C17 C18 1.470(17) . ? 
C18 C19 1.365(19) . ? 
C19 C20 1.301(19) . ? 
C19 C28 1.42(2) . ? 
C20 C21 1.365(16) . ? 
C22 C27 1.396(14) . ? 
C22 C23 1.393(13) . ? 
C23 C24 1.369(15) . ? 
C24 C25 1.370(16) . ? 
C25 C26 1.382(15) . ? 
C26 C27 1.354(15) . ? 
C28 C29 1.18(2) . ? 
C29 C30 1.69(2) . ? 
C30 C31 1.41(2) . ? 
C30 C32 1.54(3) . ? 
C34 C47 1.494(14) . ? 
C34 C43 1.512(13) . ? 
C34 C35 1.534(15) . ? 
C34 S3 1.829(10) . ? 
C35 C38 1.341(13) . ? 
C35 C36 1.391(14) . ? 
C36 C37 1.365(14) . ? 
C37 C49 1.441(14) . ? 
C37 S3 1.758(12) . ? 
C38 C42 1.428(15) . ? 
C38 C39 1.521(14) . ? 
C39 C40 1.490(16) . ? 
C40 C41 1.424(18) . ? 
C41 C42 1.492(14) . ? 
C42 C44 1.348(15) . ? 
C43 C48 1.502(15) . ? 
C43 C44 1.559(13) . ? 
C43 S4 1.828(11) . ? 
C44 C45 1.402(16) . ? 
C45 C46 1.345(14) . ? 
C46 C55 1.464(15) . ? 
C46 S4 1.746(9) . ? 
C49 C50 1.385(14) . ? 
C49 C54 1.396(13) . ? 
C50 C51 1.412(15) . ? 
C51 C52 1.396(16) . ? 
C52 C53 1.417(15) . ? 
C52 C61 1.445(15) . ? 
C53 C54 1.328(13) . ? 
C55 C60 1.353(14) . ? 
C55 C56 1.389(15) . ? 
C56 C57 1.371(18) . ? 
C57 C58 1.338(18) . ? 
C58 C59 1.342(17) . ? 
C59 C60 1.405(16) . ? 
C61 C62 1.274(15) . ? 
C62 C63 1.580(18) . ? 
C63 C64 1.45(2) . ? 
C63 C66 1.50(2) . ? 
C64 C65 1.37(3) . ? 
C33 C32 1.24(3) . ? 
  
loop_ 
 _geom_angle_atom_site_label_1 
 _geom_angle_atom_site_label_2 
 _geom_angle_atom_site_label_3 
 _geom_angle 
 _geom_angle_site_symmetry_1 
 _geom_angle_site_symmetry_3 
 _geom_angle_publ_flag 
C2 C1 C10 108.2(8) . . ? 
C2 C1 C14 108.6(7) . . ? 
C10 C1 C14 113.6(8) . . ? 
C2 C1 S1 103.8(7) . . ? 
C10 C1 S1 114.2(6) . . ? 
C14 C1 S1 108.0(6) . . ? 
C5 C2 C3 132.4(9) . . ? 
C5 C2 C1 115.5(9) . . ? 
C3 C2 C1 112.1(8) . . ? 
C4 C3 C2 115.5(8) . . ? 
C3 C4 C16 128.3(10) . . ? 
C3 C4 S1 112.7(7) . . ? 
C16 C4 S1 119.0(8) . . ? 
C2 C5 C9 122.1(9) . . ? 
C2 C5 C6 126.9(10) . . ? 
C9 C5 C6 111.0(9) . . ? 
F1 C6 F2 103.8(8) . . ? 
F1 C6 C5 118.4(8) . . ? 
F2 C6 C5 114.4(9) . . ? 
F1 C6 C7 110.3(9) . . ? 
F2 C6 C7 107.2(8) . . ? 
C5 C6 C7 102.4(8) . . ? 
F4 C7 F3 106.0(9) . . ? 
F4 C7 C8 114.5(9) . . ? 
F3 C7 C8 107.5(9) . . ? 
F4 C7 C6 114.3(9) . . ? 
F3 C7 C6 108.6(9) . . ? 
C8 C7 C6 105.7(9) . . ? 
F5 C8 F6 106.9(9) . . ? 
F5 C8 C7 112.9(9) . . ? 
F6 C8 C7 109.4(9) . . ? 
F5 C8 C9 112.6(9) . . ? 
F6 C8 C9 112.2(8) . . ? 
C7 C8 C9 102.9(9) . . ? 
C11 C9 C5 121.9(9) . . ? 
C11 C9 C8 130.1(10) . . ? 
C5 C9 C8 108.0(9) . . ? 
C11 C10 C1 110.7(7) . . ? 
C11 C10 C15 109.4(7) . . ? 
C1 C10 C15 113.0(8) . . ? 
C11 C10 S2 104.1(7) . . ? 
C1 C10 S2 112.2(6) . . ? 
C15 C10 S2 107.0(6) . . ? 
C9 C11 C12 132.7(9) . . ? 
C9 C11 C10 115.1(9) . . ? 
C12 C11 C10 111.7(8) . . ? 
C13 C12 C11 115.9(8) . . ? 
C12 C13 C22 127.8(9) . . ? 
C12 C13 S2 112.6(7) . . ? 
C22 C13 S2 119.5(7) . . ? 
C17 C16 C21 117.1(10) . . ? 
C17 C16 C4 120.9(11) . . ? 
C21 C16 C4 122.0(10) . . ? 
C16 C17 C18 119.6(11) . . ? 
C19 C18 C17 119.6(13) . . ? 
C20 C19 C18 117.4(13) . . ? 
C20 C19 C28 123.2(16) . . ? 
C18 C19 C28 119.3(17) . . ? 
C19 C20 C21 124.1(14) . . ? 
C20 C21 C16 122.0(13) . . ? 
C27 C22 C23 117.6(9) . . ? 
C27 C22 C13 120.3(9) . . ? 
C23 C22 C13 121.9(9) . . ? 
C24 C23 C22 119.7(10) . . ? 
C23 C24 C25 122.6(10) . . ? 
C26 C25 C24 117.4(10) . . ? 
C27 C26 C25 121.5(10) . . ? 
C26 C27 C22 121.1(10) . . ? 
C29 C28 C19 137(2) . . ? 
C28 C29 C30 128.5(19) . . ? 
C31 C30 C32 120.1(18) . . ? 
C31 C30 C29 116.0(14) . . ? 
C32 C30 C29 94.1(17) . . ? 
C47 C34 C43 112.2(9) . . ? 
C47 C34 C35 110.3(8) . . ? 
C43 C34 C35 108.1(8) . . ? 
C47 C34 S3 110.2(7) . . ? 
C43 C34 S3 112.3(7) . . ? 
C35 C34 S3 103.4(7) . . ? 
C38 C35 C36 131.5(10) . . ? 
C38 C35 C34 115.7(9) . . ? 
C36 C35 C34 112.7(8) . . ? 
C37 C36 C35 115.4(10) . . ? 
C36 C37 C49 128.1(10) . . ? 
C36 C37 S3 112.0(8) . . ? 
C49 C37 S3 119.8(8) . . ? 
C35 C38 C42 122.6(9) . . ? 
C35 C38 C39 128.4(10) . . ? 
C42 C38 C39 108.9(8) . . ? 
F7B C39 F8A 71.6(12) . . ? 
F7B C39 F7A 33.3(10) . . ? 
F8A C39 F7A 103.8(11) . . ? 
F7B C39 F8B 108.1(15) . . ? 
F8A C39 F8B 38.6(8) . . ? 
F7A C39 F8B 136.2(12) . . ? 
F7B C39 C40 126.6(14) . . ? 
F8A C39 C40 121.1(11) . . ? 
F7A C39 C40 102.3(10) . . ? 
F8B C39 C40 89.0(12) . . ? 
F7B C39 C38 119.5(12) . . ? 
F8A C39 C38 114.2(9) . . ? 
F7A C39 C38 112.7(9) . . ? 
F8B C39 C38 105.7(11) . . ? 
C40 C39 C38 102.3(10) . . ? 
F9B C40 F9A 28.4(11) . . ? 
F9B C40 C41 120.9(14) . . ? 
F9A C40 C41 123.8(13) . . ? 
F9B C40 C39 126.7(16) . . ? 
F9A C40 C39 113.2(12) . . ? 
C41 C40 C39 112.2(10) . . ? 
F9B C40 F10A 75.1(14) . . ? 
F9A C40 F10A 102.1(11) . . ? 
C41 C40 F10A 100.8(10) . . ? 
C39 C40 F10A 99.8(11) . . ? 
F9B C40 F10B 94.3(16) . . ? 
F9A C40 F10B 68.1(12) . . ? 
C41 C40 F10B 81.4(13) . . ? 
C39 C40 F10B 89.3(11) . . ? 
F10A C40 F10B 168.9(11) . . ? 
F11A C41 F11B 65.0(12) . . ? 
F11A C41 C40 123.6(11) . . ? 
F11B C41 C40 128.0(12) . . ? 
F11A C41 F12A 104.3(11) . . ? 
F11B C41 F12A 41.3(8) . . ? 
C40 C41 F12A 95.9(10) . . ? 
F11A C41 F12B 30.3(9) . . ? 
F11B C41 F12B 94.3(14) . . ? 
C40 C41 F12B 100.2(12) . . ? 
F12A C41 F12B 129.9(12) . . ? 
F11A C41 C42 114.2(11) . . ? 
F11B C41 C42 116.2(11) . . ? 
C40 C41 C42 105.5(10) . . ? 
F12A C41 C42 111.6(9) . . ? 
F12B C41 C42 109.1(11) . . ? 
C44 C42 C38 122.8(9) . . ? 
C44 C42 C41 127.4(10) . . ? 
C38 C42 C41 109.3(9) . . ? 
C34 C43 C48 115.1(9) . . ? 
C34 C43 C44 110.2(8) . . ? 
C48 C43 C44 105.2(8) . . ? 
C34 C43 S4 114.6(7) . . ? 
C48 C43 S4 107.4(7) . . ? 
C44 C43 S4 103.3(8) . . ? 
C42 C44 C45 133.4(9) . . ? 
C42 C44 C43 114.5(10) . . ? 
C45 C44 C43 112.0(9) . . ? 
C46 C45 C44 115.2(9) . . ? 
C45 C46 C55 128.4(9) . . ? 
C45 C46 S4 113.6(8) . . ? 
C55 C46 S4 118.0(8) . . ? 
C50 C49 C54 116.2(9) . . ? 
C50 C49 C37 122.5(9) . . ? 
C54 C49 C37 121.3(9) . . ? 
C49 C50 C51 123.2(10) . . ? 
C52 C51 C50 118.7(10) . . ? 
C51 C52 C53 116.8(10) . . ? 
C51 C52 C61 124.4(11) . . ? 
C53 C52 C61 118.7(10) . . ? 
C54 C53 C52 123.1(10) . . ? 
C53 C54 C49 122.0(9) . . ? 
C60 C55 C56 118.2(11) . . ? 
C60 C55 C46 122.7(9) . . ? 
C56 C55 C46 119.2(10) . . ? 
C57 C56 C55 120.5(12) . . ? 
C58 C57 C56 120.6(11) . . ? 
C57 C58 C59 120.4(12) . . ? 
C58 C59 C60 120.0(12) . . ? 
C55 C60 C59 120.2(10) . . ? 
C62 C61 C52 126.7(11) . . ? 
C61 C62 C63 124.5(11) . . ? 
C64 C63 C66 113.0(13) . . ? 
C64 C63 C62 108.7(13) . . ? 
C66 C63 C62 112.6(11) . . ? 
C65 C64 C63 118.0(16) . . ? 
C33 C32 C30 127(3) . . ? 
C4 S1 C1 92.8(4) . . ? 
C13 S2 C10 91.0(4) . . ? 
C37 S3 C34 92.4(5) . . ? 
C46 S4 C43 92.4(5) . . ? 
  
loop_ 
 _geom_torsion_atom_site_label_1 
 _geom_torsion_atom_site_label_2 
 _geom_torsion_atom_site_label_3 
 _geom_torsion_atom_site_label_4 
 _geom_torsion 
 _geom_torsion_site_symmetry_1 
 _geom_torsion_site_symmetry_2 
 _geom_torsion_site_symmetry_3 
 _geom_torsion_site_symmetry_4 
 _geom_torsion_publ_flag 
C10 C1 C2 C5 -41.3(11) . . . . ? 
C14 C1 C2 C5 82.4(10) . . . . ? 
S1 C1 C2 C5 -162.9(7) . . . . ? 
C10 C1 C2 C3 139.6(8) . . . . ? 
C14 C1 C2 C3 -96.7(9) . . . . ? 
S1 C1 C2 C3 18.0(9) . . . . ? 
C5 C2 C3 C4 168.5(10) . . . . ? 
C1 C2 C3 C4 -12.7(12) . . . . ? 
C2 C3 C4 C16 -177.9(9) . . . . ? 
C2 C3 C4 S1 0.0(11) . . . . ? 
C3 C2 C5 C9 -171.7(10) . . . . ? 
C1 C2 C5 C9 9.4(14) . . . . ? 
C3 C2 C5 C6 6.0(18) . . . . ? 
C1 C2 C5 C6 -172.8(9) . . . . ? 
C2 C5 C6 F1 -44.4(15) . . . . ? 
C9 C5 C6 F1 133.6(10) . . . . ? 
C2 C5 C6 F2 78.6(13) . . . . ? 
C9 C5 C6 F2 -103.4(10) . . . . ? 
C2 C5 C6 C7 -165.9(11) . . . . ? 
C9 C5 C6 C7 12.1(11) . . . . ? 
F1 C6 C7 F4 78.8(11) . . . . ? 
F2 C6 C7 F4 -33.6(12) . . . . ? 
C5 C6 C7 F4 -154.3(9) . . . . ? 
F1 C6 C7 F3 -39.2(10) . . . . ? 
F2 C6 C7 F3 -151.6(8) . . . . ? 
C5 C6 C7 F3 87.7(9) . . . . ? 
F1 C6 C7 C8 -154.3(8) . . . . ? 
F2 C6 C7 C8 93.3(9) . . . . ? 
C5 C6 C7 C8 -27.4(10) . . . . ? 
F4 C7 C8 F5 -80.0(12) . . . . ? 
F3 C7 C8 F5 37.4(12) . . . . ? 
C6 C7 C8 F5 153.3(8) . . . . ? 
F4 C7 C8 F6 38.9(13) . . . . ? 
F3 C7 C8 F6 156.4(8) . . . . ? 
C6 C7 C8 F6 -87.8(10) . . . . ? 
F4 C7 C8 C9 158.4(9) . . . . ? 
F3 C7 C8 C9 -84.2(10) . . . . ? 
C6 C7 C8 C9 31.7(10) . . . . ? 
C2 C5 C9 C11 7.0(16) . . . . ? 
C6 C5 C9 C11 -171.1(9) . . . . ? 
C2 C5 C9 C8 -174.5(10) . . . . ? 
C6 C5 C9 C8 7.4(12) . . . . ? 
F5 C8 C9 C11 31.8(15) . . . . ? 
F6 C8 C9 C11 -88.8(13) . . . . ? 
C7 C8 C9 C11 153.7(11) . . . . ? 
F5 C8 C9 C5 -146.5(9) . . . . ? 
F6 C8 C9 C5 92.8(11) . . . . ? 
C7 C8 C9 C5 -24.6(11) . . . . ? 
C2 C1 C10 C11 58.8(10) . . . . ? 
C14 C1 C10 C11 -61.9(10) . . . . ? 
S1 C1 C10 C11 173.8(7) . . . . ? 
C2 C1 C10 C15 -64.3(10) . . . . ? 
C14 C1 C10 C15 175.0(8) . . . . ? 
S1 C1 C10 C15 50.7(9) . . . . ? 
C2 C1 C10 S2 174.6(7) . . . . ? 
C14 C1 C10 S2 53.9(9) . . . . ? 
S1 C1 C10 S2 -70.4(8) . . . . ? 
C5 C9 C11 C12 -177.0(10) . . . . ? 
C8 C9 C11 C12 4.8(19) . . . . ? 
C5 C9 C11 C10 12.0(14) . . . . ? 
C8 C9 C11 C10 -166.2(10) . . . . ? 
C1 C10 C11 C9 -45.3(11) . . . . ? 
C15 C10 C11 C9 79.9(10) . . . . ? 
S2 C10 C11 C9 -166.0(7) . . . . ? 
C1 C10 C11 C12 141.7(8) . . . . ? 
C15 C10 C11 C12 -93.0(10) . . . . ? 
S2 C10 C11 C12 21.0(9) . . . . ? 
C9 C11 C12 C13 176.0(11) . . . . ? 
C10 C11 C12 C13 -12.7(12) . . . . ? 
C11 C12 C13 C22 179.8(9) . . . . ? 
C11 C12 C13 S2 -3.3(12) . . . . ? 
C3 C4 C16 C17 2.3(16) . . . . ? 
S1 C4 C16 C17 -175.5(8) . . . . ? 
C3 C4 C16 C21 -178.9(10) . . . . ? 
S1 C4 C16 C21 3.3(13) . . . . ? 
C21 C16 C17 C18 -2.9(15) . . . . ? 
C4 C16 C17 C18 175.9(9) . . . . ? 
C16 C17 C18 C19 2.0(17) . . . . ? 
C17 C18 C19 C20 -0.6(17) . . . . ? 
C17 C18 C19 C28 -176.6(10) . . . . ? 
C18 C19 C20 C21 0.2(18) . . . . ? 
C28 C19 C20 C21 176.1(11) . . . . ? 
C19 C20 C21 C16 -1.2(18) . . . . ? 
C17 C16 C21 C20 2.5(16) . . . . ? 
C4 C16 C21 C20 -176.2(10) . . . . ? 
C12 C13 C22 C27 -173.1(11) . . . . ? 
S2 C13 C22 C27 10.2(13) . . . . ? 
C12 C13 C22 C23 1.7(16) . . . . ? 
S2 C13 C22 C23 -175.0(8) . . . . ? 
C27 C22 C23 C24 2.7(16) . . . . ? 
C13 C22 C23 C24 -172.3(10) . . . . ? 
C22 C23 C24 C25 -0.5(17) . . . . ? 
C23 C24 C25 C26 -0.3(18) . . . . ? 
C24 C25 C26 C27 -1.2(19) . . . . ? 
C25 C26 C27 C22 3.6(19) . . . . ? 
C23 C22 C27 C26 -4.2(17) . . . . ? 
C13 C22 C27 C26 170.8(11) . . . . ? 
C20 C19 C28 C29 -178.5(18) . . . . ? 
C18 C19 C28 C29 -3(2) . . . . ? 
C19 C28 C29 C30 -173.7(14) . . . . ? 
C28 C29 C30 C31 104(2) . . . . ? 
C28 C29 C30 C32 -129(2) . . . . ? 
C47 C34 C35 C38 78.6(11) . . . . ? 
C43 C34 C35 C38 -44.4(11) . . . . ? 
S3 C34 C35 C38 -163.6(7) . . . . ? 
C47 C34 C35 C36 -97.5(10) . . . . ? 
C43 C34 C35 C36 139.5(9) . . . . ? 
S3 C34 C35 C36 20.3(9) . . . . ? 
C38 C35 C36 C37 171.9(11) . . . . ? 
C34 C35 C36 C37 -12.8(13) . . . . ? 
C35 C36 C37 C49 -178.7(10) . . . . ? 
C35 C36 C37 S3 -2.1(13) . . . . ? 
C36 C35 C38 C42 -175.3(11) . . . . ? 
C34 C35 C38 C42 9.5(14) . . . . ? 
C36 C35 C38 C39 2.4(19) . . . . ? 
C34 C35 C38 C39 -172.8(10) . . . . ? 
C35 C38 C39 F7B -44(2) . . . . ? 
C42 C38 C39 F7B 133.6(16) . . . . ? 
C35 C38 C39 F8A 37.4(17) . . . . ? 
C42 C38 C39 F8A -144.7(10) . . . . ? 
C35 C38 C39 F7A -80.8(14) . . . . ? 
C42 C38 C39 F7A 97.2(12) . . . . ? 
C35 C38 C39 F8B 77.7(15) . . . . ? 
C42 C38 C39 F8B -104.4(12) . . . . ? 
C35 C38 C39 C40 170.1(11) . . . . ? 
C42 C38 C39 C40 -12.0(13) . . . . ? 
F7B C39 C40 F9B 46(3) . . . . ? 
F8A C39 C40 F9B -43(3) . . . . ? 
F7A C39 C40 F9B 72(2) . . . . ? 
F8B C39 C40 F9B -66(2) . . . . ? 
C38 C39 C40 F9B -171(2) . . . . ? 
F7B C39 C40 F9A 17(2) . . . . ? 
F8A C39 C40 F9A -72.2(18) . . . . ? 
F7A C39 C40 F9A 42.5(16) . . . . ? 
F8B C39 C40 F9A -94.7(15) . . . . ? 
C38 C39 C40 F9A 159.4(13) . . . . ? 
F7B C39 C40 C41 -128.9(17) . . . . ? 
F8A C39 C40 C41 141.8(12) . . . . ? 
F7A C39 C40 C41 -103.5(13) . . . . ? 
F8B C39 C40 C41 119.2(13) . . . . ? 
C38 C39 C40 C41 13.3(15) . . . . ? 
F7B C39 C40 F10A 125.1(17) . . . . ? 
F8A C39 C40 F10A 35.7(14) . . . . ? 
F7A C39 C40 F10A 150.4(9) . . . . ? 
F8B C39 C40 F10A 13.1(11) . . . . ? 
C38 C39 C40 F10A -92.7(10) . . . . ? 
F7B C39 C40 F10B -48(2) . . . . ? 
F8A C39 C40 F10B -137.9(13) . . . . ? 
F7A C39 C40 F10B -23.2(12) . . . . ? 
F8B C39 C40 F10B -160.4(13) . . . . ? 
C38 C39 C40 F10B 93.7(12) . . . . ? 
F9B C40 C41 F11A 41(2) . . . . ? 
F9A C40 C41 F11A 74(2) . . . . ? 
C39 C40 C41 F11A -143.6(13) . . . . ? 
F10A C40 C41 F11A -38.2(15) . . . . ? 
F10B C40 C41 F11A 130.7(14) . . . . ? 
F9B C40 C41 F11B -42(3) . . . . ? 
F9A C40 C41 F11B -8(2) . . . . ? 
C39 C40 C41 F11B 133.5(16) . . . . ? 
F10A C40 C41 F11B -121.0(16) . . . . ? 
F10B C40 C41 F11B 47.9(17) . . . . ? 
F9B C40 C41 F12A -71(2) . . . . ? 
F9A C40 C41 F12A -37.0(17) . . . . ? 
C39 C40 C41 F12A 104.8(12) . . . . ? 
F10A C40 C41 F12A -149.7(8) . . . . ? 
F10B C40 C41 F12A 19.2(10) . . . . ? 
F9B C40 C41 F12B 62(2) . . . . ? 
F9A C40 C41 F12B 95.4(17) . . . . ? 
C39 C40 C41 F12B -122.8(13) . . . . ? 
F10A C40 C41 F12B -17.3(12) . . . . ? 
F10B C40 C41 F12B 151.6(12) . . . . ? 
F9B C40 C41 C42 174.9(18) . . . . ? 
F9A C40 C41 C42 -151.4(14) . . . . ? 
C39 C40 C41 C42 -9.6(15) . . . . ? 
F10A C40 C41 C42 95.9(9) . . . . ? 
F10B C40 C41 C42 -95.2(11) . . . . ? 
C35 C38 C42 C44 12.9(16) . . . . ? 
C39 C38 C42 C44 -165.2(11) . . . . ? 
C35 C38 C42 C41 -174.9(10) . . . . ? 
C39 C38 C42 C41 7.0(12) . . . . ? 
F11A C41 C42 C44 -48.0(17) . . . . ? 
F11B C41 C42 C44 24.9(19) . . . . ? 
C40 C41 C42 C44 173.1(12) . . . . ? 
F12A C41 C42 C44 70.0(16) . . . . ? 
F12B C41 C42 C44 -80.1(16) . . . . ? 
F11A C41 C42 C38 140.3(12) . . . . ? 
F11B C41 C42 C38 -146.8(13) . . . . ? 
C40 C41 C42 C38 1.3(12) . . . . ? 
F12A C41 C42 C38 -101.7(11) . . . . ? 
F12B C41 C42 C38 108.2(13) . . . . ? 
C47 C34 C43 C48 177.2(9) . . . . ? 
C35 C34 C43 C48 -61.0(11) . . . . ? 
S3 C34 C43 C48 52.4(10) . . . . ? 
C47 C34 C43 C44 -64.1(11) . . . . ? 
C35 C34 C43 C44 57.7(11) . . . . ? 
S3 C34 C43 C44 171.1(8) . . . . ? 
C47 C34 C43 S4 51.9(10) . . . . ? 
C35 C34 C43 S4 173.7(7) . . . . ? 
S3 C34 C43 S4 -72.9(9) . . . . ? 
C38 C42 C44 C45 -176.5(12) . . . . ? 
C41 C42 C44 C45 13(2) . . . . ? 
C38 C42 C44 C43 3.1(15) . . . . ? 
C41 C42 C44 C43 -167.6(10) . . . . ? 
C34 C43 C44 C42 -38.9(13) . . . . ? 
C48 C43 C44 C42 85.7(11) . . . . ? 
S4 C43 C44 C42 -161.7(9) . . . . ? 
C34 C43 C44 C45 140.8(10) . . . . ? 
C48 C43 C44 C45 -94.6(11) . . . . ? 
S4 C43 C44 C45 18.0(11) . . . . ? 
C42 C44 C45 C46 168.9(12) . . . . ? 
C43 C44 C45 C46 -10.7(14) . . . . ? 
C44 C45 C46 C55 175.2(11) . . . . ? 
C44 C45 C46 S4 -2.8(13) . . . . ? 
C36 C37 C49 C50 5.1(18) . . . . ? 
S3 C37 C49 C50 -171.3(9) . . . . ? 
C36 C37 C49 C54 -176.0(11) . . . . ? 
S3 C37 C49 C54 7.6(14) . . . . ? 
C54 C49 C50 C51 -0.8(15) . . . . ? 
C37 C49 C50 C51 178.1(10) . . . . ? 
C49 C50 C51 C52 1.5(17) . . . . ? 
C50 C51 C52 C53 -0.7(15) . . . . ? 
C50 C51 C52 C61 -177.5(10) . . . . ? 
C51 C52 C53 C54 -0.8(15) . . . . ? 
C61 C52 C53 C54 176.1(9) . . . . ? 
C52 C53 C54 C49 1.6(15) . . . . ? 
C50 C49 C54 C53 -0.8(14) . . . . ? 
C37 C49 C54 C53 -179.7(10) . . . . ? 
C45 C46 C55 C60 -175.9(12) . . . . ? 
S4 C46 C55 C60 2.1(15) . . . . ? 
C45 C46 C55 C56 2.4(18) . . . . ? 
S4 C46 C55 C56 -179.7(10) . . . . ? 
C60 C55 C56 C57 3(2) . . . . ? 
C46 C55 C56 C57 -175.3(14) . . . . ? 
C55 C56 C57 C58 1(3) . . . . ? 
C56 C57 C58 C59 -5(3) . . . . ? 
C57 C58 C59 C60 5(2) . . . . ? 
C56 C55 C60 C59 -2.9(17) . . . . ? 
C46 C55 C60 C59 175.3(11) . . . . ? 
C58 C59 C60 C55 -0.9(19) . . . . ? 
C51 C52 C61 C62 -7.1(18) . . . . ? 
C53 C52 C61 C62 176.2(11) . . . . ? 
C52 C61 C62 C63 179.8(11) . . . . ? 
C61 C62 C63 C64 -117.4(14) . . . . ? 
C61 C62 C63 C66 116.6(15) . . . . ? 
C66 C63 C64 C65 -178(2) . . . . ? 
C62 C63 C64 C65 57(2) . . . . ? 
C31 C30 C32 C33 -177(3) . . . . ? 
C29 C30 C32 C33 60(3) . . . . ? 
C3 C4 S1 C1 9.7(8) . . . . ? 
C16 C4 S1 C1 -172.2(7) . . . . ? 
C2 C1 S1 C4 -15.2(6) . . . . ? 
C10 C1 S1 C4 -132.7(7) . . . . ? 
C14 C1 S1 C4 100.0(7) . . . . ? 
C12 C13 S2 C10 13.8(8) . . . . ? 
C22 C13 S2 C10 -168.9(8) . . . . ? 
C11 C10 S2 C13 -19.1(7) . . . . ? 
C1 C10 S2 C13 -138.8(7) . . . . ? 
C15 C10 S2 C13 96.7(7) . . . . ? 
C36 C37 S3 C34 12.7(9) . . . . ? 
C49 C37 S3 C34 -170.4(9) . . . . ? 
C47 C34 S3 C37 100.0(8) . . . . ? 
C43 C34 S3 C37 -134.1(8) . . . . ? 
C35 C34 S3 C37 -17.8(7) . . . . ? 
C45 C46 S4 C43 12.2(9) . . . . ? 
C55 C46 S4 C43 -166.0(9) . . . . ? 
C34 C43 S4 C46 -136.0(8) . . . . ? 
C48 C43 S4 C46 94.7(7) . . . . ? 
C44 C43 S4 C46 -16.2(7) . . . . ? 
  
_diffrn_measured_fraction_theta_max    0.908 
_diffrn_reflns_theta_full              27.63 
_diffrn_measured_fraction_theta_full   0.908 
_refine_diff_density_max    0.571 
_refine_diff_density_min   -0.460 
_refine_diff_density_rms    0.098 
  
#===END

data_(S,S,S)-1b 
  
_audit_creation_method            SHELXL-97 
_chemical_name_systematic 
; 
(S,S,S)-1b 
; 
_publ_requested_journal
'Organic Letters '
_publ_section_title 
' '
_publ_section_abstract
' '

_publ_contact_author
;Prof. Masahiro. Irie
Department of Chemistry and Biochemistry
Graduate School of Engineering, Kyushu University
Hakozaki 6-10-1, Higashi-ku, Fukuoka, Japan
;
_publ_contact_author_phone            ' 81(92)6423556 '
_publ_contact_author_fax              ' 81(92)6423568 '
_publ_contact_author_email            ' irie@cstf.kyushu-u.ac.jp'

loop_
_publ_author_name
_publ_author_address
'Mr. Satoshi Yamamoto'
;Department of Chemistry and Biochemistry
Graduate School of Engineering, Kyushu University
Hakozaki 6-10-1, Higashi-ku, Fukuoka, Japan
;
'Dr. Kenji Matsuda'
;Department of Chemistry and Biochemistry
Graduate School of Engineering, Kyushu University
Hakozaki 6-10-1, Higashi-ku, Fukuoka, Japan
;
'Prof. Masahiro. Irie'
;Department of Chemistry and Biochemistry
Graduate School of Engineering, Kyushu University
Hakozaki 6-10-1, Higashi-ku, Fukuoka, Japan
;
_chemical_name_common             ? 
_chemical_melting_point           ? 
_chemical_formula_moiety          ? 
_chemical_formula_sum 
 'C33 H28 F6 S2' 
_chemical_formula_weight          602.67 
  
loop_ 
 _atom_type_symbol 
 _atom_type_description 
 _atom_type_scat_dispersion_real 
 _atom_type_scat_dispersion_imag 
 _atom_type_scat_source 
 'C'  'C'   0.0033   0.0016 
 'International Tables Vol C Tables 4.2.6.8 and 6.1.1.4' 
 'H'  'H'   0.0000   0.0000 
 'International Tables Vol C Tables 4.2.6.8 and 6.1.1.4' 
 'F'  'F'   0.0171   0.0103 
 'International Tables Vol C Tables 4.2.6.8 and 6.1.1.4' 
 'S'  'S'   0.1246   0.1234 
 'International Tables Vol C Tables 4.2.6.8 and 6.1.1.4' 
  
_symmetry_cell_setting            Orthorhombic 
_symmetry_space_group_name_H-M    P2(1)2(1)2(1) 
  
loop_ 
 _symmetry_equiv_pos_as_xyz 
 'x, y, z' 
 '-x+1/2, -y, z+1/2' 
 '-x, y+1/2, -z+1/2' 
 'x+1/2, -y+1/2, -z' 
  
_cell_length_a                    10.4026(18) 
_cell_length_b                    21.482(4) 
_cell_length_c                    25.657(5) 
_cell_angle_alpha                 90.00 
_cell_angle_beta                  90.00 
_cell_angle_gamma                 90.00 
_cell_volume                      5733.6(17) 
_cell_formula_units_Z             8 
_cell_measurement_temperature     173(2) 
_cell_measurement_reflns_used     ? 
_cell_measurement_theta_min       1.24  
_cell_measurement_theta_max       27.62  
  
_exptl_crystal_description        plate 
_exptl_crystal_colour             black 
_exptl_crystal_size_max           0.2 
_exptl_crystal_size_mid           0.15 
_exptl_crystal_size_min           0.02 
_exptl_crystal_density_meas       ? 
_exptl_crystal_density_diffrn     1.396 
_exptl_crystal_density_method     'not measured' 
_exptl_crystal_F_000              2496 
_exptl_absorpt_coefficient_mu     0.247 
_exptl_absorpt_correction_type    none 
_exptl_absorpt_correction_T_min   ? 
_exptl_absorpt_correction_T_max   ? 
_exptl_absorpt_process_details    ? 
  
_exptl_special_details 
; 
 ? 
; 
  
_diffrn_ambient_temperature       173(2) 
_diffrn_radiation_wavelength      0.71073 
_diffrn_radiation_type            MoK\a 
_diffrn_radiation_source          'sealed tube' 
_diffrn_radiation_monochromator   graphite 
_diffrn_measurement_device_type   'CCD area detector' 
_diffrn_measurement_method        'omega scans'
_diffrn_detector_area_resol_mean  ? 
_diffrn_standards_number          ? 
_diffrn_standards_interval_count  ? 
_diffrn_standards_interval_time   ? 
_diffrn_standards_decay_%         0.48
_diffrn_reflns_number             34862 
_diffrn_reflns_av_R_equivalents   0.2512 
_diffrn_reflns_av_sigmaI/netI     0.4792 
_diffrn_reflns_limit_h_min        -12 
_diffrn_reflns_limit_h_max        11 
_diffrn_reflns_limit_k_min        -27 
_diffrn_reflns_limit_k_max        22 
_diffrn_reflns_limit_l_min        -31 
_diffrn_reflns_limit_l_max        32 
_diffrn_reflns_theta_min          1.24 
_diffrn_reflns_theta_max          27.62 
_reflns_number_total              12421 
_reflns_number_gt                 3336 
_reflns_threshold_expression      >2sigma(I) 
  
_computing_data_collection        'Bruker SMART' 
_computing_cell_refinement        'Bruker SMART' 
_computing_data_reduction         'Bruker SHELXTL' 
_computing_structure_solution     'SHELXS-97 (Sheldrick, 1990)' 
_computing_structure_refinement   'SHELXL-97 (Sheldrick, 1997)' 
_computing_molecular_graphics     'Bruker SHELXTL' 
_computing_publication_material   'Bruker SHELXTL' 
  
_refine_special_details 
; 
 Refinement of F^2^ against ALL reflections.  The weighted R-factor wR and 
 goodness of fit S are based on F^2^, conventional R-factors R are based 
 on F, with F set to zero for negative F^2^. The threshold expression of 
 F^2^ > 2sigma(F^2^) is used only for calculating R-factors(gt) etc. and is 
 not relevant to the choice of reflections for refinement.  R-factors based 
 on F^2^ are statistically about twice as large as those based on F, and R- 
 factors based on ALL data will be even larger. 
; 
  
_refine_ls_structure_factor_coef  Fsqd 
_refine_ls_matrix_type            full 
_refine_ls_weighting_scheme       calc 
_refine_ls_weighting_details 
 'calc w=1/[\s^2^(Fo^2^)+(0.1154P)^2^+0.0000P] where P=(Fo^2^+2Fc^2^)/3' 
_atom_sites_solution_primary      direct 
_atom_sites_solution_secondary    difmap 
_atom_sites_solution_hydrogens    geom 
_refine_ls_hydrogen_treatment     mixed 
_refine_ls_extinction_method      none 
_refine_ls_extinction_coef        ? 
_refine_ls_abs_structure_details 
 'Flack H D (1983), Acta Cryst. A39, 876-881' 
_refine_ls_abs_structure_Flack    -0.12(17) 
_refine_ls_number_reflns          12421 
_refine_ls_number_parameters      747 
_refine_ls_number_restraints      0 
_refine_ls_R_factor_all           0.3307 
_refine_ls_R_factor_gt            0.0802 
_refine_ls_wR_factor_ref          0.2835 
_refine_ls_wR_factor_gt           0.1793 
_refine_ls_goodness_of_fit_ref    0.825 
_refine_ls_restrained_S_all       0.825 
_refine_ls_shift/su_max           0.000 
_refine_ls_shift/su_mean          0.000 
  
loop_ 
 _atom_site_label 
 _atom_site_type_symbol 
 _atom_site_fract_x 
 _atom_site_fract_y 
 _atom_site_fract_z 
 _atom_site_U_iso_or_equiv 
 _atom_site_adp_type 
 _atom_site_occupancy 
 _atom_site_symmetry_multiplicity 
 _atom_site_calc_flag 
 _atom_site_refinement_flags 
 _atom_site_disorder_assembly 
 _atom_site_disorder_group 
S2 S 0.4102(3) 0.58036(13) 0.00963(11) 0.0383(8) Uani 1 1 d . . . 
S3 S 1.0041(3) 0.27948(13) 0.93702(10) 0.0373(8) Uani 1 1 d . . . 
S1 S 0.4799(3) 0.72861(13) 0.06769(10) 0.0362(7) Uani 1 1 d . . . 
S4 S 0.9386(3) 0.43319(13) 0.98796(11) 0.0358(7) Uani 1 1 d . . . 
F8 F 0.6555(6) 0.3446(3) 0.7690(3) 0.058(2) Uani 1 1 d . . . 
F1 F 0.3010(7) 0.6683(3) 0.2630(2) 0.0519(18) Uani 1 1 d . . . 
F3 F 0.3354(7) 0.5482(3) 0.2619(3) 0.056(2) Uani 1 1 d . . . 
F12 F 0.6240(6) 0.4838(3) 0.8082(3) 0.057(2) Uani 1 1 d . . . 
F10 F 0.6887(7) 0.4467(4) 0.7149(2) 0.068(2) Uani 1 1 d . . . 
F7 F 0.8477(6) 0.3318(3) 0.7375(2) 0.0517(19) Uani 1 1 d . . . 
F4 F 0.1328(7) 0.5548(3) 0.2781(3) 0.065(2) Uani 1 1 d . . . 
F11 F 0.8063(7) 0.5296(3) 0.8001(2) 0.056(2) Uani 1 1 d . . . 
F2 F 0.1119(6) 0.6616(3) 0.2270(3) 0.061(2) Uani 1 1 d . . . 
F6 F 0.0739(6) 0.5229(3) 0.1820(2) 0.060(2) Uani 1 1 d . . . 
F5 F 0.2545(7) 0.4745(3) 0.1924(2) 0.0503(19) Uani 1 1 d . . . 
C46 C 0.8610(10) 0.5006(5) 0.9720(4) 0.032(3) Uani 1 1 d . . . 
C6 C 0.2369(10) 0.6345(5) 0.2278(4) 0.034(3) Uani 1 1 d . . . 
C10 C 0.3355(10) 0.6169(5) 0.0665(4) 0.030(3) Uani 1 1 d . . . 
C5 C 0.2906(10) 0.6333(5) 0.1728(4) 0.027(3) Uani 1 1 d . . . 
C8 C 0.2037(12) 0.5326(6) 0.1897(4) 0.041(3) Uani 1 1 d . . . 
F9 F 0.8886(7) 0.4511(3) 0.7337(3) 0.063(2) Uani 1 1 d . . . 
C3 C 0.4054(10) 0.7376(5) 0.1652(4) 0.030(3) Uani 1 1 d . . . 
H3 H 0.3905 0.7541 0.1990 0.036 Uiso 1 1 calc R . . 
C11 C 0.2867(10) 0.5616(5) 0.0994(4) 0.035(3) Uani 1 1 d . . . 
C25 C 0.4144(10) 0.3564(5) -0.0801(5) 0.041(3) Uani 1 1 d . . . 
C40 C 0.7697(11) 0.4355(6) 0.7531(4) 0.042(3) Uani 1 1 d . . . 
C59 C 0.9110(11) 0.5975(6) 1.0932(5) 0.048(3) Uani 1 1 d . . . 
H59 H 0.9422 0.5913 1.1277 0.058 Uiso 1 1 calc R . . 
C43 C 0.8675(9) 0.3948(5) 0.9329(4) 0.026(2) Uani 1 1 d . . . 
C9 C 0.2605(9) 0.5737(5) 0.1495(4) 0.032(3) Uani 1 1 d . . . 
C13 C 0.3439(10) 0.5070(5) 0.0236(4) 0.032(3) Uani 1 1 d . . . 
C22 C 0.3625(10) 0.4556(5) -0.0129(4) 0.031(3) Uani 1 1 d . . . 
C24 C 0.3630(10) 0.3449(6) -0.0316(4) 0.040(3) Uani 1 1 d . . . 
H24 H 0.3450 0.3034 -0.0210 0.048 Uiso 1 1 calc R . . 
C53 C 1.1464(10) 0.0853(6) 0.9204(5) 0.049(3) Uani 1 1 d . . . 
H53 H 1.1980 0.0708 0.9484 0.058 Uiso 1 1 calc R . . 
C23 C 0.3380(9) 0.3935(5) 0.0010(4) 0.034(3) Uani 1 1 d . . . 
H23 H 0.3027 0.3851 0.0345 0.041 Uiso 1 1 calc R . . 
C35 C 0.8984(10) 0.3278(5) 0.8526(4) 0.031(3) Uani 1 1 d . . . 
C58 C 0.8683(11) 0.6561(6) 1.0789(5) 0.048(4) Uani 1 1 d . . . 
C44 C 0.8270(9) 0.4456(5) 0.8969(4) 0.031(3) Uani 1 1 d . . . 
C14 C 0.5527(10) 0.6199(5) 0.1138(4) 0.039(3) Uani 1 1 d . . . 
H14A H 0.5292 0.5785 0.1268 0.059 Uiso 1 1 calc R . . 
H14B H 0.5979 0.6429 0.1411 0.059 Uiso 1 1 calc R . . 
H14C H 0.6089 0.6155 0.0833 0.059 Uiso 1 1 calc R . . 
C36 C 0.9283(10) 0.2649(5) 0.8413(4) 0.036(3) Uani 1 1 d . . . 
H36 H 0.9119 0.2464 0.8083 0.043 Uiso 1 1 calc R . . 
C60 C 0.9097(11) 0.5478(5) 1.0591(4) 0.042(3) Uani 1 1 d . . . 
H60 H 0.9415 0.5085 1.0702 0.051 Uiso 1 1 calc R . . 
C42 C 0.8044(10) 0.4315(5) 0.8455(4) 0.035(3) Uani 1 1 d . . . 
C2 C 0.3656(10) 0.6773(5) 0.1490(4) 0.032(3) Uani 1 1 d . . . 
C29 C 0.4582(11) 0.2465(5) -0.1070(4) 0.044(3) Uani 1 1 d . . . 
H29 H 0.4258 0.2322 -0.0745 0.052 Uiso 1 1 calc R . . 
C27 C 0.4102(10) 0.4659(5) -0.0615(4) 0.034(3) Uani 1 1 d . . . 
H27 H 0.4253 0.5076 -0.0724 0.041 Uiso 1 1 calc R . . 
C39 C 0.7748(11) 0.3678(6) 0.7703(4) 0.039(3) Uani 1 1 d . . . 
C1 C 0.4289(10) 0.6559(5) 0.0979(4) 0.030(3) Uani 1 1 d . . . 
C12 C 0.2857(10) 0.5048(5) 0.0707(4) 0.032(3) Uani 1 1 d . . . 
H12 H 0.2467 0.4680 0.0838 0.038 Uiso 1 1 calc R . . 
C57 C 0.8226(13) 0.6645(6) 1.0297(6) 0.063(4) Uani 1 1 d . . . 
H57 H 0.7940 0.7043 1.0185 0.076 Uiso 1 1 calc R . . 
C38 C 0.8274(10) 0.3710(5) 0.8260(4) 0.031(3) Uani 1 1 d . . . 
C47 C 1.0879(9) 0.3838(5) 0.8868(4) 0.036(3) Uani 1 1 d . . . 
H47A H 1.1427 0.3547 0.8675 0.054 Uiso 1 1 calc R . . 
H47B H 1.1335 0.3984 0.9179 0.054 Uiso 1 1 calc R . . 
H47C H 1.0670 0.4195 0.8645 0.054 Uiso 1 1 calc R . . 
C21 C 0.5716(10) 0.8639(5) 0.0881(4) 0.039(3) Uani 1 1 d . . . 
H21 H 0.5632 0.8456 0.0546 0.047 Uiso 1 1 calc R . . 
C34 C 0.9631(10) 0.3507(5) 0.9032(4) 0.031(3) Uani 1 1 d . . . 
C4 C 0.4677(10) 0.7690(5) 0.1264(4) 0.029(3) Uani 1 1 d . . . 
C26 C 0.4370(10) 0.4183(5) -0.0953(4) 0.039(3) Uani 1 1 d . . . 
H26 H 0.4709 0.4270 -0.1289 0.047 Uiso 1 1 calc R . . 
C45 C 0.8100(10) 0.5030(5) 0.9239(4) 0.033(3) Uani 1 1 d . . . 
H45 H 0.7680 0.5384 0.9097 0.040 Uiso 1 1 calc R . . 
C49 C 1.0231(10) 0.1690(5) 0.8807(4) 0.031(3) Uani 1 1 d . . . 
C48 C 0.7481(9) 0.3573(5) 0.9494(4) 0.041(3) Uani 1 1 d . . . 
H48A H 0.6808 0.3859 0.9612 0.062 Uiso 1 1 calc R . . 
H48B H 0.7711 0.3289 0.9778 0.062 Uiso 1 1 calc R . . 
H48C H 0.7164 0.3332 0.9196 0.062 Uiso 1 1 calc R . . 
C16 C 0.5254(9) 0.8312(5) 0.1309(4) 0.035(3) Uani 1 1 d . . . 
C55 C 0.8638(11) 0.5543(5) 1.0099(5) 0.038(3) Uani 1 1 d . . . 
C17 C 0.5357(12) 0.8606(5) 0.1795(4) 0.050(3) Uani 1 1 d . . . 
H17 H 0.5015 0.8410 0.2097 0.060 Uiso 1 1 calc R . . 
C37 C 0.9813(10) 0.2336(5) 0.8808(4) 0.034(3) Uani 1 1 d . . . 
C41 C 0.7524(11) 0.4709(6) 0.8049(5) 0.044(3) Uani 1 1 d . . . 
C7 C 0.2198(12) 0.5675(6) 0.2419(4) 0.043(3) Uani 1 1 d . . . 
C30 C 0.5122(13) 0.1993(5) -0.1440(5) 0.051(3) Uani 1 1 d . . . 
H30 H 0.5497 0.2207 -0.1751 0.061 Uiso 1 1 calc R . . 
C50 C 0.9858(12) 0.1289(5) 0.8411(5) 0.050(3) Uani 1 1 d . . . 
H50 H 0.9278 0.1419 0.8146 0.060 Uiso 1 1 calc R . . 
C54 C 1.0984(11) 0.1450(5) 0.9208(5) 0.048(3) Uani 1 1 d . . . 
H54 H 1.1175 0.1710 0.9497 0.058 Uiso 1 1 calc R . . 
C19 C 0.6428(11) 0.9477(6) 0.1398(5) 0.047(3) Uani 1 1 d . . . 
H19 H 0.6851 0.9867 0.1431 0.057 Uiso 1 1 calc R . . 
C18 C 0.5946(12) 0.9171(6) 0.1839(5) 0.055(4) Uani 1 1 d . . . 
H18 H 0.6030 0.9359 0.2173 0.066 Uiso 1 1 calc R . . 
C52 C 1.1192(11) 0.0475(6) 0.8796(5) 0.059(4) Uani 1 1 d . . . 
H52 H 1.1563 0.0072 0.8773 0.071 Uiso 1 1 calc R . . 
C66 C 0.8704(15) 0.8017(6) 1.2051(5) 0.078(5) Uani 1 1 d . . . 
H66A H 0.7877 0.7803 1.2088 0.117 Uiso 1 1 calc R . . 
H66B H 0.8683 0.8409 1.2246 0.117 Uiso 1 1 calc R . . 
H66C H 0.9392 0.7752 1.2188 0.117 Uiso 1 1 calc R . . 
C62 C 0.8859(17) 0.7625(9) 1.1062(8) 0.104(7) Uani 1 1 d . . . 
H62 H 0.8826 0.7726 1.0702 0.125 Uiso 1 1 calc R . . 
C28 C 0.4528(10) 0.3060(5) -0.1167(4) 0.034(3) Uani 1 1 d . . . 
H28 H 0.4760 0.3186 -0.1510 0.041 Uiso 1 1 calc R . . 
C56 C 0.8183(12) 0.6123(7) 0.9953(5) 0.062(4) Uani 1 1 d . . . 
H56 H 0.7833 0.6175 0.9613 0.074 Uiso 1 1 calc R . . 
C15 C 0.2183(9) 0.6540(5) 0.0487(4) 0.038(3) Uani 1 1 d . . . 
H15A H 0.1821 0.6766 0.0785 0.057 Uiso 1 1 calc R . . 
H15B H 0.1535 0.6255 0.0346 0.057 Uiso 1 1 calc R . . 
H15C H 0.2440 0.6837 0.0217 0.057 Uiso 1 1 calc R . . 
C32 C 0.3107(15) 0.1850(7) -0.1953(6) 0.082(5) Uani 1 1 d . . . 
H32A H 0.3530 0.2023 -0.2262 0.123 Uiso 1 1 calc R . . 
H32B H 0.2682 0.2185 -0.1759 0.123 Uiso 1 1 calc R . . 
H32C H 0.2467 0.1541 -0.2061 0.123 Uiso 1 1 calc R . . 
C31 C 0.4095(15) 0.1543(6) -0.1609(7) 0.087(5) Uani 1 1 d . . . 
H31A H 0.3665 0.1370 -0.1297 0.104 Uiso 1 1 calc R . . 
H31B H 0.4498 0.1194 -0.1801 0.104 Uiso 1 1 calc R . . 
C61 C 0.8824(14) 0.7100(8) 1.1187(7) 0.087(6) Uani 1 1 d . . . 
H61 H 0.8884 0.7001 1.1547 0.104 Uiso 1 1 calc R . . 
C20 C 0.6280(11) 0.9205(6) 0.0918(5) 0.048(3) Uani 1 1 d . . . 
H20 H 0.6571 0.9413 0.0613 0.057 Uiso 1 1 calc R . . 
C65 C 1.1260(17) 0.8322(9) 1.1323(8) 0.136(9) Uani 1 1 d . . . 
H65A H 1.1416 0.8022 1.1604 0.204 Uiso 1 1 calc R . . 
H65B H 1.1910 0.8651 1.1337 0.204 Uiso 1 1 calc R . . 
H65C H 1.1310 0.8108 1.0986 0.204 Uiso 1 1 calc R . . 
C63 C 0.8959(13) 0.8155(7) 1.1464(6) 0.069(4) Uani 1 1 d . . . 
H63 H 0.8244 0.8443 1.1365 0.082 Uiso 1 1 calc R . . 
C51 C 1.0368(12) 0.0687(6) 0.8416(5) 0.060(4) Uani 1 1 d . . . 
H51 H 1.0133 0.0410 0.8143 0.071 Uiso 1 1 calc R . . 
C33 C 0.6220(15) 0.1631(7) -0.1130(6) 0.094(6) Uani 1 1 d . . . 
H33A H 0.6858 0.1930 -0.1002 0.141 Uiso 1 1 calc R . . 
H33B H 0.6638 0.1332 -0.1364 0.141 Uiso 1 1 calc R . . 
H33C H 0.5838 0.1409 -0.0835 0.141 Uiso 1 1 calc R . . 
C64 C 1.0190(19) 0.8550(11) 1.1375(8) 0.153(11) Uani 1 1 d . . . 
H64A H 1.0030 0.8806 1.1061 0.183 Uiso 1 1 calc R . . 
H64B H 1.0247 0.8843 1.1672 0.183 Uiso 1 1 calc R . . 
  
loop_ 
 _atom_site_aniso_label 
 _atom_site_aniso_U_11 
 _atom_site_aniso_U_22 
 _atom_site_aniso_U_33 
 _atom_site_aniso_U_23 
 _atom_site_aniso_U_13 
 _atom_site_aniso_U_12 
S2 0.0534(19) 0.0388(18) 0.0227(16) -0.0033(13) 0.0032(14) -0.0128(16) 
S3 0.0520(19) 0.0314(17) 0.0286(16) 0.0028(13) -0.0056(15) 0.0063(15) 
S1 0.0471(18) 0.0346(17) 0.0268(16) 0.0035(13) 0.0037(14) -0.0080(15) 
S4 0.0465(18) 0.0360(17) 0.0250(16) -0.0030(13) -0.0064(13) 0.0076(15) 
F8 0.044(4) 0.075(6) 0.056(5) -0.004(4) -0.015(3) -0.017(4) 
F1 0.082(5) 0.043(4) 0.031(4) -0.012(3) 0.002(4) -0.007(4) 
F3 0.069(5) 0.051(5) 0.048(4) 0.010(4) -0.012(4) 0.007(4) 
F12 0.035(4) 0.072(5) 0.064(5) 0.017(4) -0.009(4) 0.012(4) 
F10 0.088(6) 0.084(6) 0.032(4) 0.013(4) -0.033(4) 0.011(5) 
F7 0.054(4) 0.076(5) 0.025(4) -0.001(4) -0.004(3) 0.003(4) 
F4 0.090(6) 0.065(5) 0.041(4) 0.008(4) 0.031(4) -0.027(5) 
F11 0.064(5) 0.053(5) 0.052(4) 0.023(4) -0.012(4) -0.001(4) 
F2 0.055(5) 0.060(5) 0.066(5) 0.008(4) 0.018(4) 0.027(4) 
F6 0.048(5) 0.086(5) 0.046(4) 0.013(4) 0.000(3) -0.026(4) 
F5 0.081(5) 0.030(4) 0.039(4) 0.008(3) 0.019(4) -0.002(4) 
C46 0.028(6) 0.034(7) 0.033(7) -0.001(5) 0.007(5) 0.005(5) 
C6 0.024(6) 0.041(8) 0.037(7) -0.001(6) 0.007(5) -0.002(6) 
C10 0.035(6) 0.032(7) 0.022(6) 0.002(5) 0.001(5) -0.008(5) 
C5 0.034(6) 0.028(7) 0.019(6) 0.004(5) 0.006(5) -0.002(5) 
C8 0.044(8) 0.048(9) 0.031(7) 0.000(6) 0.008(6) -0.006(7) 
F9 0.071(5) 0.068(5) 0.051(5) 0.014(4) 0.021(4) 0.004(4) 
C3 0.042(7) 0.031(7) 0.015(6) 0.002(5) 0.009(5) 0.007(6) 
C11 0.049(7) 0.036(7) 0.021(6) 0.006(5) 0.000(5) -0.015(6) 
C25 0.039(7) 0.026(7) 0.059(9) 0.003(6) -0.014(6) -0.006(6) 
C40 0.039(8) 0.059(9) 0.029(7) 0.013(6) -0.021(6) 0.008(7) 
C59 0.051(8) 0.042(8) 0.051(8) -0.019(7) -0.004(7) 0.002(7) 
C43 0.023(6) 0.026(6) 0.030(6) -0.004(5) 0.005(5) -0.002(5) 
C9 0.035(7) 0.038(7) 0.021(6) 0.003(5) 0.009(5) -0.002(6) 
C13 0.038(7) 0.032(7) 0.027(7) 0.004(5) -0.011(5) -0.004(5) 
C22 0.039(7) 0.038(7) 0.018(6) 0.000(5) 0.002(5) 0.002(5) 
C24 0.034(7) 0.062(9) 0.026(7) 0.006(6) 0.006(5) 0.001(6) 
C53 0.030(7) 0.037(8) 0.079(10) -0.001(7) -0.012(7) 0.007(6) 
C23 0.034(7) 0.035(7) 0.034(7) 0.008(6) -0.002(5) -0.011(6) 
C35 0.035(7) 0.038(7) 0.020(6) -0.003(5) -0.005(5) 0.007(6) 
C58 0.029(7) 0.059(10) 0.055(10) -0.022(8) 0.027(6) -0.017(7) 
C44 0.023(6) 0.041(8) 0.031(7) 0.002(6) 0.000(5) -0.004(6) 
C14 0.044(7) 0.037(7) 0.037(7) -0.004(6) 0.000(6) -0.002(6) 
C36 0.040(7) 0.032(7) 0.036(7) -0.006(6) 0.004(5) -0.002(6) 
C60 0.051(8) 0.045(8) 0.031(7) -0.013(6) 0.001(6) -0.007(6) 
C42 0.038(7) 0.036(7) 0.032(7) 0.007(6) -0.004(5) 0.001(6) 
C2 0.032(6) 0.037(7) 0.028(6) 0.012(6) -0.002(5) -0.007(6) 
C29 0.051(8) 0.037(8) 0.043(8) 0.004(6) 0.012(6) 0.001(7) 
C27 0.042(7) 0.030(7) 0.030(7) 0.005(5) 0.003(6) 0.003(6) 
C39 0.042(8) 0.056(9) 0.020(6) 0.005(6) 0.003(5) 0.013(7) 
C1 0.031(6) 0.026(6) 0.032(7) 0.006(5) -0.001(5) -0.001(6) 
C12 0.039(7) 0.030(7) 0.028(6) 0.000(5) 0.002(6) -0.011(5) 
C57 0.088(11) 0.034(9) 0.067(11) 0.003(8) 0.049(9) 0.001(8) 
C38 0.030(7) 0.051(8) 0.013(6) 0.004(5) 0.002(5) -0.008(6) 
C47 0.031(7) 0.030(7) 0.047(7) 0.003(6) 0.004(5) 0.000(6) 
C21 0.045(7) 0.040(7) 0.033(7) 0.002(6) 0.008(6) -0.016(6) 
C34 0.036(7) 0.024(6) 0.032(6) -0.002(5) -0.006(5) -0.002(6) 
C4 0.034(6) 0.035(7) 0.020(6) 0.006(5) -0.005(5) -0.011(6) 
C26 0.054(8) 0.037(7) 0.026(6) 0.012(6) 0.015(6) 0.009(7) 
C45 0.042(7) 0.022(7) 0.036(7) 0.009(5) 0.000(6) 0.007(6) 
C49 0.037(7) 0.026(6) 0.030(6) -0.004(5) -0.012(5) -0.004(6) 
C48 0.030(7) 0.051(8) 0.042(8) -0.006(6) -0.005(5) -0.012(6) 
C16 0.024(6) 0.041(7) 0.038(7) -0.015(6) 0.000(5) -0.006(6) 
C55 0.041(7) 0.023(7) 0.050(8) 0.000(6) 0.014(6) -0.009(6) 
C17 0.078(9) 0.032(7) 0.040(8) -0.004(6) 0.010(7) -0.021(7) 
C37 0.040(7) 0.035(7) 0.027(6) -0.009(5) -0.008(5) 0.000(6) 
C41 0.029(7) 0.057(9) 0.046(8) 0.006(7) 0.007(6) 0.000(7) 
C7 0.064(9) 0.048(9) 0.019(6) 0.003(6) 0.022(6) -0.006(7) 
C30 0.065(9) 0.033(7) 0.056(8) 0.003(6) 0.015(7) 0.005(7) 
C50 0.069(9) 0.023(7) 0.058(9) -0.009(6) -0.020(7) 0.014(7) 
C54 0.063(9) 0.035(7) 0.047(8) 0.009(6) 0.000(7) 0.009(7) 
C19 0.053(8) 0.031(8) 0.057(9) -0.009(7) 0.005(7) 0.002(6) 
C18 0.065(9) 0.047(8) 0.053(9) -0.015(7) 0.012(7) -0.009(8) 
C52 0.036(8) 0.048(9) 0.094(12) 0.000(8) -0.022(8) 0.003(7) 
C66 0.120(14) 0.036(8) 0.079(11) -0.009(8) -0.033(10) 0.002(9) 
C62 0.101(15) 0.088(15) 0.123(17) 0.040(13) 0.061(12) 0.024(13) 
C28 0.041(8) 0.035(7) 0.025(6) 0.003(5) 0.009(5) -0.006(6) 
C56 0.072(10) 0.070(11) 0.044(9) -0.003(8) 0.032(7) -0.001(8) 
C15 0.033(7) 0.054(8) 0.026(7) 0.003(6) -0.002(5) 0.000(6) 
C32 0.088(12) 0.082(12) 0.076(11) -0.029(10) 0.031(10) -0.033(10) 
C31 0.087(12) 0.027(9) 0.147(17) 0.003(9) 0.012(12) -0.002(9) 
C61 0.055(10) 0.077(13) 0.128(16) 0.026(12) 0.046(10) 0.015(10) 
C20 0.050(8) 0.040(8) 0.053(8) 0.000(7) 0.006(6) -0.007(7) 
C65 0.082(14) 0.094(15) 0.23(3) -0.058(15) 0.066(16) -0.037(12) 
C63 0.057(10) 0.062(10) 0.087(12) -0.026(9) -0.002(8) 0.008(8) 
C51 0.061(9) 0.042(8) 0.076(10) -0.031(7) -0.022(8) 0.001(7) 
C33 0.109(13) 0.076(12) 0.097(13) -0.005(10) 0.027(10) 0.054(11) 
C64 0.087(14) 0.20(3) 0.17(2) -0.128(19) 0.044(14) -0.055(17) 
  
_geom_special_details 
; 
 All esds (except the esd in the dihedral angle between two l.s. planes) 
 are estimated using the full covariance matrix.  The cell esds are taken 
 into account individually in the estimation of esds in distances, angles 
 and torsion angles; correlations between esds in cell parameters are only 
 used when they are defined by crystal symmetry.  An approximate (isotropic) 
 treatment of cell esds is used for estimating esds involving l.s. planes. 
; 
  
loop_ 
 _geom_bond_atom_site_label_1 
 _geom_bond_atom_site_label_2 
 _geom_bond_distance 
 _geom_bond_site_symmetry_2 
 _geom_bond_publ_flag 
S2 C13 1.757(11) . ? 
S2 C10 1.829(10) . ? 
S3 C37 1.763(10) . ? 
S3 C34 1.809(10) . ? 
S1 C4 1.742(10) . ? 
S1 C1 1.823(10) . ? 
S4 C46 1.707(11) . ? 
S4 C43 1.796(10) . ? 
F8 C39 1.338(12) . ? 
F1 C6 1.336(12) . ? 
F3 C7 1.372(13) . ? 
F12 C41 1.366(12) . ? 
F10 C40 1.315(11) . ? 
F7 C39 1.372(12) . ? 
F4 C7 1.325(11) . ? 
F11 C41 1.386(14) . ? 
F2 C6 1.425(11) . ? 
F6 C8 1.380(12) . ? 
F5 C8 1.356(13) . ? 
C46 C45 1.345(14) . ? 
C46 C55 1.510(14) . ? 
C6 C7 1.494(15) . ? 
C6 C5 1.518(14) . ? 
C10 C1 1.515(14) . ? 
C10 C15 1.526(14) . ? 
C10 C11 1.545(14) . ? 
C5 C2 1.369(13) . ? 
C5 C9 1.448(14) . ? 
C8 C9 1.481(14) . ? 
C8 C7 1.545(15) . ? 
F9 C40 1.375(13) . ? 
C3 C4 1.366(13) . ? 
C3 C2 1.423(14) . ? 
C11 C9 1.339(13) . ? 
C11 C12 1.424(14) . ? 
C25 C24 1.376(15) . ? 
C25 C26 1.405(14) . ? 
C25 C28 1.489(15) . ? 
C40 C39 1.521(16) . ? 
C40 C41 1.541(16) . ? 
C59 C60 1.382(14) . ? 
C59 C58 1.384(17) . ? 
C43 C44 1.491(14) . ? 
C43 C48 1.540(13) . ? 
C43 C34 1.569(13) . ? 
C13 C12 1.354(13) . ? 
C13 C22 1.460(14) . ? 
C22 C27 1.359(13) . ? 
C22 C23 1.405(14) . ? 
C24 C23 1.364(14) . ? 
C53 C52 1.354(16) . ? 
C53 C54 1.377(15) . ? 
C35 C38 1.369(14) . ? 
C35 C36 1.417(14) . ? 
C35 C34 1.543(13) . ? 
C58 C57 1.361(17) . ? 
C58 C61 1.55(2) . ? 
C44 C42 1.374(14) . ? 
C44 C45 1.426(14) . ? 
C14 C1 1.557(13) . ? 
C36 C37 1.335(14) . ? 
C60 C55 1.357(14) . ? 
C42 C38 1.412(15) . ? 
C42 C41 1.447(15) . ? 
C2 C1 1.536(14) . ? 
C29 C28 1.302(14) . ? 
C29 C30 1.498(15) . ? 
C27 C26 1.370(13) . ? 
C39 C38 1.532(14) . ? 
C57 C56 1.429(17) . ? 
C47 C34 1.540(13) . ? 
C21 C20 1.354(15) . ? 
C21 C16 1.390(14) . ? 
C4 C16 1.470(14) . ? 
C49 C50 1.387(14) . ? 
C49 C54 1.392(14) . ? 
C49 C37 1.454(14) . ? 
C16 C17 1.402(14) . ? 
C55 C56 1.384(16) . ? 
C17 C18 1.363(15) . ? 
C30 C31 1.504(17) . ? 
C30 C33 1.594(18) . ? 
C50 C51 1.399(15) . ? 
C19 C20 1.372(15) . ? 
C19 C18 1.403(15) . ? 
C52 C51 1.376(16) . ? 
C66 C63 1.557(18) . ? 
C62 C61 1.171(19) . ? 
C62 C63 1.54(2) . ? 
C32 C31 1.506(19) . ? 
C65 C64 1.22(2) . ? 
C63 C64 1.55(2) . ? 
  
loop_ 
 _geom_angle_atom_site_label_1 
 _geom_angle_atom_site_label_2 
 _geom_angle_atom_site_label_3 
 _geom_angle 
 _geom_angle_site_symmetry_1 
 _geom_angle_site_symmetry_3 
 _geom_angle_publ_flag 
C13 S2 C10 93.2(5) . . ? 
C37 S3 C34 92.8(5) . . ? 
C4 S1 C1 92.2(5) . . ? 
C46 S4 C43 90.4(5) . . ? 
C45 C46 C55 124.7(10) . . ? 
C45 C46 S4 116.1(8) . . ? 
C55 C46 S4 119.0(8) . . ? 
F1 C6 F2 104.1(9) . . ? 
F1 C6 C7 114.8(10) . . ? 
F2 C6 C7 106.7(9) . . ? 
F1 C6 C5 117.0(9) . . ? 
F2 C6 C5 109.2(9) . . ? 
C7 C6 C5 104.7(9) . . ? 
C1 C10 C15 112.5(9) . . ? 
C1 C10 C11 110.1(8) . . ? 
C15 C10 C11 107.6(8) . . ? 
C1 C10 S2 112.9(7) . . ? 
C15 C10 S2 109.0(7) . . ? 
C11 C10 S2 104.3(7) . . ? 
C2 C5 C9 123.3(9) . . ? 
C2 C5 C6 127.9(10) . . ? 
C9 C5 C6 108.6(9) . . ? 
F5 C8 F6 104.5(9) . . ? 
F5 C8 C9 115.4(9) . . ? 
F6 C8 C9 112.4(9) . . ? 
F5 C8 C7 111.1(10) . . ? 
F6 C8 C7 107.7(9) . . ? 
C9 C8 C7 105.7(10) . . ? 
C4 C3 C2 112.0(9) . . ? 
C9 C11 C12 131.4(10) . . ? 
C9 C11 C10 116.3(10) . . ? 
C12 C11 C10 112.1(9) . . ? 
C24 C25 C26 119.0(11) . . ? 
C24 C25 C28 123.0(10) . . ? 
C26 C25 C28 117.9(10) . . ? 
F10 C40 F9 105.1(9) . . ? 
F10 C40 C39 114.4(10) . . ? 
F9 C40 C39 107.8(9) . . ? 
F10 C40 C41 118.6(10) . . ? 
F9 C40 C41 107.3(9) . . ? 
C39 C40 C41 103.1(9) . . ? 
C60 C59 C58 122.1(12) . . ? 
C44 C43 C48 109.0(8) . . ? 
C44 C43 C34 108.7(8) . . ? 
C48 C43 C34 109.2(8) . . ? 
C44 C43 S4 105.5(7) . . ? 
C48 C43 S4 110.9(7) . . ? 
C34 C43 S4 113.5(7) . . ? 
C11 C9 C5 121.6(10) . . ? 
C11 C9 C8 129.3(11) . . ? 
C5 C9 C8 109.1(9) . . ? 
C12 C13 C22 127.4(10) . . ? 
C12 C13 S2 112.8(8) . . ? 
C22 C13 S2 119.7(8) . . ? 
C27 C22 C23 117.1(10) . . ? 
C27 C22 C13 120.9(10) . . ? 
C23 C22 C13 122.0(9) . . ? 
C23 C24 C25 119.5(11) . . ? 
C52 C53 C54 119.2(12) . . ? 
C24 C23 C22 122.4(10) . . ? 
C38 C35 C36 131.6(10) . . ? 
C38 C35 C34 116.0(10) . . ? 
C36 C35 C34 112.4(9) . . ? 
C57 C58 C59 118.6(12) . . ? 
C57 C58 C61 122.9(14) . . ? 
C59 C58 C61 118.3(13) . . ? 
C42 C44 C45 129.5(10) . . ? 
C42 C44 C43 118.8(10) . . ? 
C45 C44 C43 111.6(9) . . ? 
C37 C36 C35 114.5(10) . . ? 
C55 C60 C59 120.9(12) . . ? 
C44 C42 C38 120.9(10) . . ? 
C44 C42 C41 128.7(11) . . ? 
C38 C42 C41 110.3(10) . . ? 
C5 C2 C3 131.6(10) . . ? 
C5 C2 C1 114.8(10) . . ? 
C3 C2 C1 113.4(9) . . ? 
C28 C29 C30 124.0(11) . . ? 
C22 C27 C26 122.1(10) . . ? 
F8 C39 F7 106.8(10) . . ? 
F8 C39 C40 108.4(9) . . ? 
F7 C39 C40 112.5(9) . . ? 
F8 C39 C38 111.7(9) . . ? 
F7 C39 C38 113.6(9) . . ? 
C40 C39 C38 103.8(10) . . ? 
C10 C1 C2 110.2(8) . . ? 
C10 C1 C14 113.2(8) . . ? 
C2 C1 C14 106.3(8) . . ? 
C10 C1 S1 115.7(7) . . ? 
C2 C1 S1 103.4(7) . . ? 
C14 C1 S1 107.2(7) . . ? 
C13 C12 C11 115.5(10) . . ? 
C58 C57 C56 118.7(13) . . ? 
C35 C38 C42 122.6(10) . . ? 
C35 C38 C39 128.8(10) . . ? 
C42 C38 C39 108.2(10) . . ? 
C20 C21 C16 123.3(11) . . ? 
C47 C34 C35 106.6(8) . . ? 
C47 C34 C43 112.8(8) . . ? 
C35 C34 C43 108.9(8) . . ? 
C47 C34 S3 108.8(7) . . ? 
C35 C34 S3 103.7(7) . . ? 
C43 C34 S3 115.3(7) . . ? 
C3 C4 C16 125.8(10) . . ? 
C3 C4 S1 114.7(8) . . ? 
C16 C4 S1 119.5(7) . . ? 
C27 C26 C25 119.9(10) . . ? 
C46 C45 C44 111.3(10) . . ? 
C50 C49 C54 117.9(10) . . ? 
C50 C49 C37 120.7(9) . . ? 
C54 C49 C37 121.3(10) . . ? 
C21 C16 C17 116.7(10) . . ? 
C21 C16 C4 122.5(10) . . ? 
C17 C16 C4 120.8(10) . . ? 
C60 C55 C56 117.7(12) . . ? 
C60 C55 C46 121.8(11) . . ? 
C56 C55 C46 120.4(11) . . ? 
C18 C17 C16 120.6(11) . . ? 
C36 C37 C49 126.9(10) . . ? 
C36 C37 S3 113.3(9) . . ? 
C49 C37 S3 119.7(8) . . ? 
F12 C41 F11 102.5(10) . . ? 
F12 C41 C42 116.1(10) . . ? 
F11 C41 C42 116.5(10) . . ? 
F12 C41 C40 105.5(9) . . ? 
F11 C41 C40 108.9(10) . . ? 
C42 C41 C40 106.7(10) . . ? 
F4 C7 F3 105.9(9) . . ? 
F4 C7 C6 116.7(10) . . ? 
F3 C7 C6 106.1(10) . . ? 
F4 C7 C8 115.7(10) . . ? 
F3 C7 C8 105.8(9) . . ? 
C6 C7 C8 105.7(9) . . ? 
C29 C30 C31 110.6(11) . . ? 
C29 C30 C33 106.5(10) . . ? 
C31 C30 C33 109.8(11) . . ? 
C49 C50 C51 117.5(11) . . ? 
C53 C54 C49 123.0(12) . . ? 
C20 C19 C18 119.0(12) . . ? 
C17 C18 C19 120.8(12) . . ? 
C53 C52 C51 118.7(13) . . ? 
C61 C62 C63 122(2) . . ? 
C29 C28 C25 127.2(11) . . ? 
C55 C56 C57 121.9(13) . . ? 
C30 C31 C32 111.9(11) . . ? 
C62 C61 C58 123(2) . . ? 
C21 C20 C19 119.6(12) . . ? 
C62 C63 C64 111.2(13) . . ? 
C62 C63 C66 119.7(13) . . ? 
C64 C63 C66 112.7(13) . . ? 
C52 C51 C50 123.2(12) . . ? 
C65 C64 C63 123(2) . . ? 
  
loop_ 
 _geom_torsion_atom_site_label_1 
 _geom_torsion_atom_site_label_2 
 _geom_torsion_atom_site_label_3 
 _geom_torsion_atom_site_label_4 
 _geom_torsion 
 _geom_torsion_site_symmetry_1 
 _geom_torsion_site_symmetry_2 
 _geom_torsion_site_symmetry_3 
 _geom_torsion_site_symmetry_4 
 _geom_torsion_publ_flag 
C43 S4 C46 C45 -14.4(9) . . . . ? 
C43 S4 C46 C55 170.7(8) . . . . ? 
C13 S2 C10 C1 132.2(8) . . . . ? 
C13 S2 C10 C15 -102.1(8) . . . . ? 
C13 S2 C10 C11 12.6(7) . . . . ? 
F1 C6 C5 C2 -25.4(16) . . . . ? 
F2 C6 C5 C2 92.4(13) . . . . ? 
C7 C6 C5 C2 -153.7(11) . . . . ? 
F1 C6 C5 C9 148.8(9) . . . . ? 
F2 C6 C5 C9 -93.4(10) . . . . ? 
C7 C6 C5 C9 20.5(12) . . . . ? 
C1 C10 C11 C9 40.4(13) . . . . ? 
C15 C10 C11 C9 -82.5(12) . . . . ? 
S2 C10 C11 C9 161.8(9) . . . . ? 
C1 C10 C11 C12 -135.8(9) . . . . ? 
C15 C10 C11 C12 101.3(11) . . . . ? 
S2 C10 C11 C12 -14.4(11) . . . . ? 
C46 S4 C43 C44 20.1(7) . . . . ? 
C46 S4 C43 C48 -97.8(8) . . . . ? 
C46 S4 C43 C34 139.0(8) . . . . ? 
C12 C11 C9 C5 168.4(11) . . . . ? 
C10 C11 C9 C5 -7.0(16) . . . . ? 
C12 C11 C9 C8 -10(2) . . . . ? 
C10 C11 C9 C8 174.9(10) . . . . ? 
C2 C5 C9 C11 -11.2(17) . . . . ? 
C6 C5 C9 C11 174.2(10) . . . . ? 
C2 C5 C9 C8 167.3(10) . . . . ? 
C6 C5 C9 C8 -7.3(12) . . . . ? 
F5 C8 C9 C11 46.7(17) . . . . ? 
F6 C8 C9 C11 -73.0(15) . . . . ? 
C7 C8 C9 C11 169.8(12) . . . . ? 
F5 C8 C9 C5 -131.7(10) . . . . ? 
F6 C8 C9 C5 108.7(11) . . . . ? 
C7 C8 C9 C5 -8.5(12) . . . . ? 
C10 S2 C13 C12 -8.7(9) . . . . ? 
C10 S2 C13 C22 175.0(9) . . . . ? 
C12 C13 C22 C27 172.6(11) . . . . ? 
S2 C13 C22 C27 -11.7(14) . . . . ? 
C12 C13 C22 C23 -10.3(17) . . . . ? 
S2 C13 C22 C23 165.3(8) . . . . ? 
C26 C25 C24 C23 -1.6(17) . . . . ? 
C28 C25 C24 C23 175.7(10) . . . . ? 
C25 C24 C23 C22 0.2(17) . . . . ? 
C27 C22 C23 C24 1.5(16) . . . . ? 
C13 C22 C23 C24 -175.6(10) . . . . ? 
C60 C59 C58 C57 0.7(19) . . . . ? 
C60 C59 C58 C61 -175.7(11) . . . . ? 
C48 C43 C44 C42 -79.8(11) . . . . ? 
C34 C43 C44 C42 39.1(12) . . . . ? 
S4 C43 C44 C42 161.1(8) . . . . ? 
C48 C43 C44 C45 96.5(10) . . . . ? 
C34 C43 C44 C45 -144.6(9) . . . . ? 
S4 C43 C44 C45 -22.6(10) . . . . ? 
C38 C35 C36 C37 -168.6(11) . . . . ? 
C34 C35 C36 C37 13.8(14) . . . . ? 
C58 C59 C60 C55 -1.3(19) . . . . ? 
C45 C44 C42 C38 -179.8(11) . . . . ? 
C43 C44 C42 C38 -4.3(15) . . . . ? 
C45 C44 C42 C41 -2.5(19) . . . . ? 
C43 C44 C42 C41 173.1(10) . . . . ? 
C9 C5 C2 C3 180.0(10) . . . . ? 
C6 C5 C2 C3 -6.6(19) . . . . ? 
C9 C5 C2 C1 -6.6(15) . . . . ? 
C6 C5 C2 C1 166.9(10) . . . . ? 
C4 C3 C2 C5 -172.5(11) . . . . ? 
C4 C3 C2 C1 13.9(13) . . . . ? 
C23 C22 C27 C26 -1.8(16) . . . . ? 
C13 C22 C27 C26 175.4(10) . . . . ? 
F10 C40 C39 F8 -38.6(13) . . . . ? 
F9 C40 C39 F8 -155.2(9) . . . . ? 
C41 C40 C39 F8 91.5(10) . . . . ? 
F10 C40 C39 F7 79.2(13) . . . . ? 
F9 C40 C39 F7 -37.4(12) . . . . ? 
C41 C40 C39 F7 -150.7(9) . . . . ? 
F10 C40 C39 C38 -157.6(10) . . . . ? 
F9 C40 C39 C38 85.8(10) . . . . ? 
C41 C40 C39 C38 -27.5(11) . . . . ? 
C15 C10 C1 C2 64.3(11) . . . . ? 
C11 C10 C1 C2 -55.7(11) . . . . ? 
S2 C10 C1 C2 -171.8(7) . . . . ? 
C15 C10 C1 C14 -176.8(8) . . . . ? 
C11 C10 C1 C14 63.2(11) . . . . ? 
S2 C10 C1 C14 -52.9(10) . . . . ? 
C15 C10 C1 S1 -52.4(10) . . . . ? 
C11 C10 C1 S1 -172.4(7) . . . . ? 
S2 C10 C1 S1 71.4(9) . . . . ? 
C5 C2 C1 C10 40.0(12) . . . . ? 
C3 C2 C1 C10 -145.4(9) . . . . ? 
C5 C2 C1 C14 -83.1(10) . . . . ? 
C3 C2 C1 C14 91.6(10) . . . . ? 
C5 C2 C1 S1 164.2(8) . . . . ? 
C3 C2 C1 S1 -21.1(10) . . . . ? 
C4 S1 C1 C10 138.3(8) . . . . ? 
C4 S1 C1 C2 17.8(7) . . . . ? 
C4 S1 C1 C14 -94.2(7) . . . . ? 
C22 C13 C12 C11 176.9(10) . . . . ? 
S2 C13 C12 C11 1.0(13) . . . . ? 
C9 C11 C12 C13 -166.1(12) . . . . ? 
C10 C11 C12 C13 9.4(14) . . . . ? 
C59 C58 C57 C56 1.1(18) . . . . ? 
C61 C58 C57 C56 177.4(11) . . . . ? 
C36 C35 C38 C42 177.1(11) . . . . ? 
C34 C35 C38 C42 -5.4(15) . . . . ? 
C36 C35 C38 C39 -11.1(19) . . . . ? 
C34 C35 C38 C39 166.4(10) . . . . ? 
C44 C42 C38 C35 -14.9(16) . . . . ? 
C41 C42 C38 C35 167.3(10) . . . . ? 
C44 C42 C38 C39 171.8(10) . . . . ? 
C41 C42 C38 C39 -6.0(13) . . . . ? 
F8 C39 C38 C35 92.2(13) . . . . ? 
F7 C39 C38 C35 -28.6(16) . . . . ? 
C40 C39 C38 C35 -151.1(11) . . . . ? 
F8 C39 C38 C42 -95.1(11) . . . . ? 
F7 C39 C38 C42 144.0(10) . . . . ? 
C40 C39 C38 C42 21.6(12) . . . . ? 
C38 C35 C34 C47 -82.0(11) . . . . ? 
C36 C35 C34 C47 96.0(10) . . . . ? 
C38 C35 C34 C43 39.9(12) . . . . ? 
C36 C35 C34 C43 -142.1(9) . . . . ? 
C38 C35 C34 S3 163.2(8) . . . . ? 
C36 C35 C34 S3 -18.8(10) . . . . ? 
C44 C43 C34 C47 63.2(11) . . . . ? 
C48 C43 C34 C47 -178.0(8) . . . . ? 
S4 C43 C34 C47 -53.9(10) . . . . ? 
C44 C43 C34 C35 -54.9(11) . . . . ? 
C48 C43 C34 C35 63.9(11) . . . . ? 
S4 C43 C34 C35 -171.9(7) . . . . ? 
C44 C43 C34 S3 -171.0(7) . . . . ? 
C48 C43 C34 S3 -52.2(10) . . . . ? 
S4 C43 C34 S3 72.0(8) . . . . ? 
C37 S3 C34 C47 -98.1(8) . . . . ? 
C37 S3 C34 C35 15.1(7) . . . . ? 
C37 S3 C34 C43 134.1(8) . . . . ? 
C2 C3 C4 C16 -177.4(10) . . . . ? 
C2 C3 C4 S1 1.1(12) . . . . ? 
C1 S1 C4 C3 -12.2(9) . . . . ? 
C1 S1 C4 C16 166.4(9) . . . . ? 
C22 C27 C26 C25 0.5(17) . . . . ? 
C24 C25 C26 C27 1.3(17) . . . . ? 
C28 C25 C26 C27 -176.2(10) . . . . ? 
C55 C46 C45 C44 177.6(9) . . . . ? 
S4 C46 C45 C44 3.0(13) . . . . ? 
C42 C44 C45 C46 -170.7(11) . . . . ? 
C43 C44 C45 C46 13.6(13) . . . . ? 
C20 C21 C16 C17 2.0(18) . . . . ? 
C20 C21 C16 C4 -178.2(11) . . . . ? 
C3 C4 C16 C21 -170.9(11) . . . . ? 
S1 C4 C16 C21 10.7(15) . . . . ? 
C3 C4 C16 C17 8.9(17) . . . . ? 
S1 C4 C16 C17 -169.5(9) . . . . ? 
C59 C60 C55 C56 0.0(18) . . . . ? 
C59 C60 C55 C46 -179.8(10) . . . . ? 
C45 C46 C55 C60 175.9(11) . . . . ? 
S4 C46 C55 C60 -9.6(15) . . . . ? 
C45 C46 C55 C56 -3.8(17) . . . . ? 
S4 C46 C55 C56 170.6(9) . . . . ? 
C21 C16 C17 C18 -3.2(18) . . . . ? 
C4 C16 C17 C18 177.0(11) . . . . ? 
C35 C36 C37 C49 -179.3(10) . . . . ? 
C35 C36 C37 S3 -1.3(13) . . . . ? 
C50 C49 C37 C36 -14.0(18) . . . . ? 
C54 C49 C37 C36 167.9(11) . . . . ? 
C50 C49 C37 S3 168.1(9) . . . . ? 
C54 C49 C37 S3 -10.1(15) . . . . ? 
C34 S3 C37 C36 -9.1(9) . . . . ? 
C34 S3 C37 C49 169.1(9) . . . . ? 
C44 C42 C41 F12 -72.4(16) . . . . ? 
C38 C42 C41 F12 105.2(12) . . . . ? 
C44 C42 C41 F11 48.5(16) . . . . ? 
C38 C42 C41 F11 -133.9(10) . . . . ? 
C44 C42 C41 C40 170.3(11) . . . . ? 
C38 C42 C41 C40 -12.1(13) . . . . ? 
F10 C40 C41 F12 28.4(15) . . . . ? 
F9 C40 C41 F12 147.1(9) . . . . ? 
C39 C40 C41 F12 -99.2(11) . . . . ? 
F10 C40 C41 F11 -81.1(13) . . . . ? 
F9 C40 C41 F11 37.7(12) . . . . ? 
C39 C40 C41 F11 151.4(9) . . . . ? 
F10 C40 C41 C42 152.4(11) . . . . ? 
F9 C40 C41 C42 -88.8(11) . . . . ? 
C39 C40 C41 C42 24.9(12) . . . . ? 
F1 C6 C7 F4 75.0(13) . . . . ? 
F2 C6 C7 F4 -39.7(14) . . . . ? 
C5 C6 C7 F4 -155.4(10) . . . . ? 
F1 C6 C7 F3 -42.7(12) . . . . ? 
F2 C6 C7 F3 -157.4(8) . . . . ? 
C5 C6 C7 F3 86.9(10) . . . . ? 
F1 C6 C7 C8 -154.7(9) . . . . ? 
F2 C6 C7 C8 90.5(10) . . . . ? 
C5 C6 C7 C8 -25.1(12) . . . . ? 
F5 C8 C7 F4 -82.1(13) . . . . ? 
F6 C8 C7 F4 31.7(14) . . . . ? 
C9 C8 C7 F4 152.1(10) . . . . ? 
F5 C8 C7 F3 34.8(12) . . . . ? 
F6 C8 C7 F3 148.6(9) . . . . ? 
C9 C8 C7 F3 -91.0(10) . . . . ? 
F5 C8 C7 C6 147.1(9) . . . . ? 
F6 C8 C7 C6 -99.1(11) . . . . ? 
C9 C8 C7 C6 21.2(13) . . . . ? 
C28 C29 C30 C31 -116.6(14) . . . . ? 
C28 C29 C30 C33 124.1(13) . . . . ? 
C54 C49 C50 C51 -6.0(18) . . . . ? 
C37 C49 C50 C51 175.7(11) . . . . ? 
C52 C53 C54 C49 -0.5(19) . . . . ? 
C50 C49 C54 C53 5.9(18) . . . . ? 
C37 C49 C54 C53 -175.8(11) . . . . ? 
C16 C17 C18 C19 2(2) . . . . ? 
C20 C19 C18 C17 1.1(19) . . . . ? 
C54 C53 C52 C51 -5(2) . . . . ? 
C30 C29 C28 C25 -172.6(11) . . . . ? 
C24 C25 C28 C29 -8.5(19) . . . . ? 
C26 C25 C28 C29 168.8(12) . . . . ? 
C60 C55 C56 C57 1.9(18) . . . . ? 
C46 C55 C56 C57 -178.3(10) . . . . ? 
C58 C57 C56 C55 -2.5(19) . . . . ? 
C29 C30 C31 C32 68.9(16) . . . . ? 
C33 C30 C31 C32 -173.9(12) . . . . ? 
C63 C62 C61 C58 178.1(12) . . . . ? 
C57 C58 C61 C62 -20(2) . . . . ? 
C59 C58 C61 C62 156.7(17) . . . . ? 
C16 C21 C20 C19 0.8(18) . . . . ? 
C18 C19 C20 C21 -2.4(18) . . . . ? 
C61 C62 C63 C64 120(2) . . . . ? 
C61 C62 C63 C66 -14(3) . . . . ? 
C53 C52 C51 C50 4(2) . . . . ? 
C49 C50 C51 C52 1(2) . . . . ? 
C62 C63 C64 C65 -49(3) . . . . ? 
C66 C63 C64 C65 88(2) . . . . ? 
  
_diffrn_measured_fraction_theta_max    0.957 
_diffrn_reflns_theta_full              27.62 
_diffrn_measured_fraction_theta_full   0.957 
_refine_diff_density_max    0.435 
_refine_diff_density_min   -0.538 
_refine_diff_density_rms    0.096 
  
#===END   
